# Supplementary material for: Comprehensive Transcriptome Profiling of Dairy Goat Mammary Gland Identifies Genes and Networks Crucial for Lactation and Fatty Acid Metabolism
Source: Front Genet. 2020 Sep 25;11:878. doi: 10.3389/fgene.2020.00878 (PMC7545057; doi:10.3389/fgene.2020.00878)
Supplement: FILE S3 — Dynamic Impact Approach (DIA) analysis of differentially expressed genes during different stages of the lactation cycle. (A) General information during the process of DIA analysis using DEGs. (B) DEG data of the three comparison groups used in the DIA analysis. (C) Flux and impact generated by the DIA analysis. (D) Summary graph generated from the DIA analysis. (E) Overall pathway rank generated by the DIA analysis. (F) Pathway rank in each comparison generated by the DIA analysis. [file Table_3.xlsx]

## Sheet: Sheet(A)
Species (Please select species from the drop down menu!)	Bovine (bta)				280674	Entrez Gene ID of the array (please add in ascending order from the second raw)
p-value between comparisons cut-off	0.001	3			280675			Bovine (bta)	Bar	0	0	200
Total unique Entrez gene ID in array	30824				280677			Human (hsa)	Shade	-200	0	200
Tot unique Entrez gene ID in array associated with term	#REF!	#REF!	% array genes		280678			Mouse (mmu)
Total number of Terms covered by the Genome	#VALUE!				280682				10 most overall impacted Terms	Impact	Flux	Rank
Total number of Terms covered by the Array	#VALUE!		#VALUE!	% genome terms	280685				Butirosin and neomycin biosynthesis	554.963	212.437	1
Terms in array with at the least coverage of (%)	20	#VALUE!	#VALUE!	% array terms	280686				Glyoxylate and dicarboxylate metabolism	502.358	502.358	2
Terms in array with at the least coverage of (%)	50	#VALUE!	#VALUE!	% array terms	280687				Caffeine metabolism	457.674	30.6699	3
Terms underrepresented with a min of coverage (%)	20	#VALUE!	#VALUE!	% Term	280688				Galactose metabolism	415.068	171.082	4
Terms underrepresented with a min of coverage (%)	50	#VALUE!	#VALUE!	% Term	280691				Glycosaminoglycan biosynthesis - keratan sulfate	414.155	-350.822	5
Average coverage of terms by array (%)	#REF!	%			280692				Prion diseases	349.219	114.515	6
% mean coverage of terms by array (min %)	20	#VALUE!	#VALUE!	% array terms	280695				Glycosphingolipid biosynthesis - globo series	332.796	-332.796	7
% mean coverage of terms by array (min %)	50	#VALUE!	#VALUE!	% array terms	280699				Glycosphingolipid biosynthesis - ganglio series	332.796	-332.796	8
Max coverage	#REF!	%			280701				Staphylococcus aureus infection	316.509	-223.943	9
Number of terms with coverage min of (%)	100	#VALUE!	#VALUE!	% array terms	280705				Complement and coagulation cascades	295.881	-62.7144	10
Min coverage	#REF!	%			280706
Number of terms with coverage of (%)	0	#VALUE!	#VALUE!	% array terms	280707
					280710
Cut-off % coverage of terms selected	30	minimum acceptable % of genes in pathway covered by array			280711
					280712				Yes
Is your dataset in "DATA-DEG" with FDR for overall effect?	Yes	If Yes add in column C of "DATA-DEG" the FDR values			280713				No
Minimum number of genes in a pathway	4	this is considering the whole genome			280714
If you have a FDR column please add the FDR cut-off	0.06	X			280715
Value for maximum bar of impact	200				280716
Number of overal DEG (oligo) (FDR£X)	#VALUE!				280717
					280718
					280719
					280720
					280722
					280726
					280728
					280729
					280730
					280733
					280734
					280737
					280740
					280741
					280742
					280745
					280746
					280748
					280749
					280750
					280752
					280753
					280755
					280756
					280758
					280759
					280760
					280761
					280762
					280763
					280765
					280781
					280784
					280785
					280787
					280789
					280792
					280794
					280795
					280796
					280798
					280799
					280800
					280801
					280802
					280804
					280805
					280808
					280812
					280813
					280814
					280815
					280816
					280817
					280820
					280821
					280822
					280823
					280824
					280825
					280826
					280827
					280828
					280829
					280830
					280831
					280832
					280833
					280834
					280836
					280838
					280839
					280840
					280841
					280843
					280844
					280845
					280846
					280847
					280849
					280851
					280852
					280855
					280857
					280858
					280859
					280860
					280863
					280867
					280868
					280869
					280871
					280872
					280873
					280875
					280877
					280878
					280880
					280881
					280884
					280885
					280887
					280888
					280890
					280891
					280894
					280897
					280900
					280901
					280903
					280904
					280905
					280907
					280909
					280910
					280911
					280916
					280922
					280924
					280930
					280932
					280933
					280934
					280936
					280937
					280939
					280941
					280943
					280946
					280948
					280950
					280951
					280952
					280955
					280956
					280957
					280958
					280960
					280961
					280963
					280964
					280965
					280968
					280969
					280976
					280977
					280979
					280981
					280985
					280986
					280987
					280988
					280989
					280991
					280993
					280994
					280995
					280996
					280997
					281002
					281004
					281006
					281008
					281010
					281011
					281013
					281017
					281019
					281020
					281022
					281023
					281031
					281032
					281033
					281035
					281036
					281037
					281038
					281039
					281040
					281041
					281043
					281044
					281047
					281048
					281050
					281051
					281052
					281053
					281054
					281055
					281056
					281057
					281058
					281060
					281061
					281062
					281063
					281066
					281067
					281068
					281069
					281070
					281071
					281072
					281073
					281078
					281080
					281088
					281090
					281091
					281092
					281093
					281094
					281095
					281096
					281097
					281099
					281102
					281103
					281105
					281108
					281110
					281111
					281112
					281115
					281117
					281118
					281119
					281120
					281122
					281123
					281124
					281125
					281126
					281127
					281128
					281129
					281131
					281133
					281134
					281135
					281136
					281137
					281138
					281139
					281141
					281142
					281144
					281146
					281148
					281151
					281152
					281153
					281154
					281156
					281157
					281158
					281160
					281161
					281165
					281167
					281168
					281169
					281170
					281171
					281172
					281173
					281174
					281175
					281177
					281179
					281181
					281183
					281184
					281187
					281188
					281189
					281190
					281191
					281192
					281193
					281194
					281195
					281196
					281198
					281199
					281201
					281202
					281203
					281204
					281206
					281207
					281208
					281209
					281210
					281212
					281214
					281216
					281217
					281220
					281222
					281225
					281226
					281227
					281229
					281230
					281231
					281233
					281235
					281236
					281237
					281239
					281240
					281246
					281247
					281248
					281249
					281250
					281251
					281254
					281258
					281259
					281268
					281269
					281270
					281274
					281275
					281276
					281278
					281281
					281282
					281283
					281285
					281287
					281289
					281291
					281293
					281294
					281295
					281296
					281297
					281298
					281299
					281300
					281301
					281302
					281306
					281308
					281309
					281311
					281312
					281333
					281335
					281336
					281337
					281338
					281339
					281341
					281342
					281343
					281345
					281346
					281347
					281348
					281349
					281350
					281351
					281354
					281355
					281356
					281357
					281358
					281360
					281361
					281363
					281365
					281366
					281368
					281370
					281371
					281373
					281374
					281375
					281376
					281377
					281385
					281386
					281387
					281400
					281401
					281402
					281405
					281406
					281407
					281408
					281409
					281410
					281413
					281414
					281416
					281417
					281418
					281419
					281420
					281421
					281422
					281423
					281424
					281426
					281427
					281428
					281429
					281430
					281433
					281437
					281439
					281440
					281443
					281444
					281445
					281447
					281448
					281449
					281450
					281451
					281452
					281453
					281454
					281456
					281457
					281465
					281474
					281476
					281477
					281478
					281480
					281481
					281482
					281483
					281484
					281485
					281486
					281487
					281489
					281490
					281492
					281494
					281495
					281496
					281499
					281500
					281504
					281507
					281509
					281510
					281511
					281512
					281513
					281515
					281518
					281528
					281529
					281530
					281534
					281535
					281536
					281537
					281538
					281542
					281543
					281544
					281545
					281546
					281549
					281551
					281552
					281553
					281554
					281555
					281556
					281557
					281559
					281561
					281562
					281563
					281564
					281565
					281566
					281567
					281568
					281569
					281570
					281572
					281573
					281574
					281576
					281577
					281581
					281583
					281584
					281585
					281586
					281588
					281589
					281590
					281592
					281594
					281595
					281597
					281598
					281599
					281600
					281601
					281603
					281604
					281605
					281606
					281607
					281609
					281610
					281611
					281612
					281613
					281614
					281615
					281617
					281618
					281620
					281625
					281626
					281627
					281630
					281631
					281637
					281638
					281640
					281641
					281642
					281643
					281644
					281645
					281646
					281647
					281649
					281650
					281651
					281652
					281653
					281654
					281656
					281658
					281660
					281661
					281662
					281663
					281664
					281665
					281666
					281667
					281668
					281671
					281672
					281674
					281677
					281678
					281681
					281682
					281683
					281684
					281685
					281686
					281687
					281688
					281689
					281690
					281691
					281692
					281694
					281696
					281698
					281700
					281701
					281702
					281705
					281706
					281707
					281710
					281711
					281712
					281713
					281715
					281716
					281717
					281718
					281719
					281720
					281722
					281723
					281724
					281725
					281728
					281729
					281730
					281731
					281732
					281733
					281735
					281736
					281737
					281738
					281739
					281740
					281741
					281742
					281743
					281747
					281748
					281749
					281750
					281751
					281752
					281753
					281754
					281758
					281759
					281760
					281762
					281766
					281767
					281768
					281769
					281770
					281773
					281777
					281778
					281779
					281780
					281781
					281782
					281783
					281785
					281786
					281787
					281788
					281789
					281790
					281791
					281792
					281793
					281794
					281795
					281796
					281797
					281798
					281799
					281800
					281801
					281802
					281803
					281805
					281806
					281809
					281810
					281811
					281812
					281813
					281814
					281816
					281817
					281820
					281824
					281827
					281831
					281832
					281833
					281834
					281838
					281839
					281840
					281845
					281847
					281848
					281849
					281850
					281854
					281855
					281856
					281857
					281860
					281861
					281862
					281863
					281865
					281866
					281867
					281869
					281870
					281871
					281872
					281873
					281874
					281875
					281876
					281877
					281878
					281879
					281880
					281881
					281883
					281884
					281885
					281886
					281888
					281889
					281894
					281897
					281898
					281899
					281900
					281903
					281904
					281905
					281908
					281909
					281912
					281913
					281914
					281915
					281916
					281917
					281918
					281923
					281935
					281936
					281937
					281938
					281939
					281940
					281941
					281942
					281943
					281944
					281945
					281946
					281948
					281949
					281950
					281951
					281952
					281956
					281957
					281958
					281960
					281961
					281962
					281963
					281964
					281967
					281968
					281969
					281970
					281971
					281972
					281973
					281974
					281975
					281976
					281977
					281978
					281983
					281985
					281986
					281987
					281989
					281990
					281991
					281992
					281993
					281994
					281995
					281996
					281997
					281998
					281999
					282000
					282001
					282002
					282004
					282005
					282006
					282007
					282009
					282010
					282011
					282013
					282015
					282016
					282018
					282019
					282020
					282021
					282022
					282023
					282024
					282028
					282029
					282030
					282031
					282032
					282034
					282035
					282038
					282040
					282041
					282043
					282044
					282048
					282049
					282050
					282052
					282053
					282060
					282061
					282066
					282068
					282069
					282071
					282072
					282073
					282076
					282077
					282078
					282081
					282082
					282083
					282087
					282088
					282089
					282090
					282091
					282092
					282093
					282094
					282095
					282096
					282097
					282099
					282100
					282101
					282102
					282104
					282105
					282107
					282110
					282112
					282113
					282115
					282116
					282118
					282119
					282120
					282121
					282122
					282123
					282124
					282125
					282126
					282127
					282130
					282131
					282132
					282133
					282134
					282135
					282136
					282137
					282138
					282139
					282140
					282141
					282142
					282143
					282144
					282146
					282147
					282148
					282149
					282150
					282151
					282152
					282157
					282160
					282161
					282162
					282164
					282165
					282166
					282167
					282170
					282173
					282176
					282177
					282178
					282179
					282181
					282182
					282183
					282184
					282187
					282188
					282191
					282194
					282195
					282196
					282199
					282200
					282201
					282202
					282203
					282204
					282205
					282206
					282208
					282209
					282211
					282213
					282214
					282215
					282216
					282217
					282218
					282220
					282223
					282224
					282226
					282227
					282229
					282233
					282236
					282237
					282238
					282239
					282240
					282241
					282243
					282244
					282245
					282246
					282248
					282254
					282255
					282257
					282258
					282259
					282260
					282261
					282262
					282264
					282270
					282271
					282272
					282275
					282276
					282277
					282289
					282290
					282291
					282293
					282294
					282295
					282296
					282298
					282299
					282301
					282303
					282304
					282305
					282306
					282307
					282308
					282309
					282311
					282312
					282315
					282316
					282318
					282319
					282320
					282321
					282322
					282323
					282324
					282325
					282326
					282328
					282329
					282330
					282331
					282333
					282335
					282337
					282338
					282340
					282341
					282342
					282343
					282344
					282346
					282348
					282351
					282352
					282353
					282354
					282355
					282356
					282357
					282358
					282359
					282360
					282361
					282362
					282363
					282365
					282366
					282367
					282368
					282369
					282370
					282373
					282375
					282376
					282377
					282378
					282379
					282380
					282382
					282384
					282385
					282386
					282387
					282388
					282389
					282390
					282392
					282393
					282394
					282401
					282405
					282407
					282410
					282411
					282412
					282413
					282415
					282416
					282419
					282420
					282421
					282422
					282430
					282431
					282433
					282434
					282438
					282446
					282447
					282452
					282454
					282455
					282457
					282459
					282462
					282463
					282466
					282467
					282468
					282469
					282470
					282471
					282472
					282474
					282476
					282477
					282478
					282479
					282480
					282483
					282484
					282485
					282488
					282490
					282491
					282493
					282494
					282495
					282497
					282498
					282513
					282514
					282515
					282516
					282517
					282518
					282521
					282522
					282523
					282524
					282527
					282530
					282531
					282532
					282534
					282535
					282562
					282563
					282564
					282572
					282573
					282574
					282576
					282577
					282578
					282588
					282589
					282590
					282591
					282598
					282599
					282601
					282602
					282603
					282604
					282605
					282608
					282609
					282612
					282614
					282637
					282638
					282639
					282640
					282641
					282642
					282643
					282644
					282645
					282646
					282647
					282648
					282651
					282652
					282653
					282654
					282656
					282657
					282658
					282659
					282660
					282661
					282662
					282682
					282684
					282685
					282687
					282688
					282689
					282690
					282691
					282701
					282702
					282703
					282704
					282705
					282707
					282709
					282710
					282711
					282713
					282714
					282715
					282716
					282820
					282846
					282847
					282848
					282851
					282852
					282853
					282854
					282855
					282856
					282857
					282858
					282859
					282860
					282861
					282862
					282863
					282865
					282866
					282867
					282868
					282869
					282870
					282871
					282872
					282873
					282874
					282875
					282876
					282877
					282879
					282880
					282881
					282882
					282883
					282884
					282885
					282886
					282887
					286762
					286764
					286765
					286766
					286767
					286768
					286770
					286771
					286772
					286773
					286790
					286791
					286792
					286793
					286794
					286796
					286797
					286798
					286799
					286800
					286802
					286803
					286804
					286805
					286806
					286808
					286809
					286810
					286811
					286812
					286813
					286814
					286815
					286816
					286817
					286818
					286819
					286820
					286821
					286822
					286823
					286824
					286825
					286836
					286837
					286838
					286839
					286840
					286842
					286843
					286844
					286845
					286846
					286849
					286850
					286851
					286852
					286853
					286854
					286855
					286856
					286857
					286858
					286859
					286861
					286862
					286863
					286864
					286865
					286866
					286867
					286868
					286869
					286870
					286871
					286872
					286873
					286876
					286877
					286879
					286880
					286881
					286882
					286883
					286884
					286885
					286886
					286969
					287007
					287011
					287012
					287013
					287014
					287016
					287017
					287018
					287019
					287020
					287022
					287023
					287024
					287025
					287026
					287027
					287327
					288380
					317650
					317651
					317654
					317655
					317656
					317657
					317658
					317659
					317660
					317663
					317692
					317693
					317694
					317695
					317696
					317697
					317698
					317699
					317704
					317706
					317707
					317708
					317710
					317711
					317721
					317723
					317724
					317725
					317748
					317756
					317776
					317777
					317779
					319086
					319094
					319095
					319096
					319097
					319141
					326284
					326285
					326334
					326346
					326576
					326577
					326578
					326579
					326580
					326581
					326582
					326583
					326584
					326588
					326597
					326598
					326599
					326600
					326601
					326602
					327660
					327662
					327663
					327664
					327665
					327666
					327667
					327668
					327669
					327670
					327671
					327672
					327673
					327675
					327676
					327677
					327678
					327679
					327680
					327681
					327682
					327683
					327684
					327685
					327686
					327687
					327688
					327689
					327690
					327691
					327692
					327693
					327694
					327696
					327697
					327698
					327699
					327700
					327701
					327702
					327703
					327704
					327705
					327706
					327707
					327708
					327709
					327710
					327711
					327712
					327713
					327714
					327715
					327716
					327717
					327718
					327953
					337870
					337871
					337885
					337886
					337887
					337888
					337889
					337890
					337896
					337897
					337898
					337899
					337900
					337901
					337902
					337903
					337904
					337906
					337907
					337908
					337909
					337910
					337911
					337912
					337913
					337914
					337915
					337916
					337918
					337919
					337925
					337926
					337927
					338031
					338033
					338034
					338035
					338036
					338037
					338038
					338039
					338040
					338042
					338044
					338045
					338046
					338047
					338048
					338049
					338050
					338051
					338052
					338053
					338054
					338055
					338056
					338057
					338058
					338059
					338060
					338061
					338062
					338063
					338064
					338065
					338066
					338067
					338068
					338070
					338071
					338072
					338073
					338074
					338075
					338077
					338078
					338079
					338081
					338082
					338084
					338085
					338086
					338087
					338089
					338092
					338100
					338325
					338381
					338419
					338437
					338445
					338446
					338471
					338472
					347699
					347700
					352958
					352959
					352960
					353105
					353106
					353107
					353108
					353110
					353111
					353112
					353113
					353114
					353115
					353120
					353121
					353160
					353217
					353245
					353254
					353300
					353301
					353348
					353350
					353351
					353352
					353353
					353354
					353510
					359712
					359713
					359714
					359715
					359716
					359718
					359720
					359721
					359722
					360006
					360007
					360190
					360191
					360192
					360193
					360194
					360195
					360196
					360197
					369019
					369020
					369021
					369023
					369024
					369025
					373543
					378474
					378475
					379035
					379045
					386587
					386664
					387602
					399559
					399560
					399680
					399681
					399683
					403090
					404034
					404053
					404057
					404058
					404059
					404061
					404066
					404069
					404070
					404071
					404072
					404073
					404074
					404075
					404076
					404081
					404082
					404083
					404084
					404089
					404098
					404100
					404101
					404103
					404104
					404105
					404107
					404108
					404109
					404110
					404111
					404114
					404115
					404118
					404121
					404122
					404123
					404124
					404125
					404126
					404128
					404129
					404130
					404131
					404132
					404133
					404134
					404135
					404136
					404137
					404138
					404140
					404141
					404142
					404143
					404144
					404146
					404148
					404149
					404150
					404151
					404152
					404153
					404154
					404155
					404156
					404159
					404160
					404161
					404162
					404163
					404164
					404165
					404166
					404167
					404168
					404169
					404170
					404171
					404177
					404179
					404180
					404181
					404182
					404183
					404185
					404186
					404187
					404188
					404189
					404190
					404191
					404192
					404193
					404546
					404547
					404548
					406200
					406231
					407098
					407100
					407101
					407102
					407103
					407104
					407106
					407107
					407109
					407110
					407111
					407112
					407114
					407118
					407121
					407122
					407124
					407125
					407126
					407127
					407128
					407129
					407130
					407131
					407132
					407133
					407135
					407136
					407137
					407139
					407140
					407142
					407143
					407144
					407145
					407146
					407147
					407148
					407149
					407151
					407152
					407154
					407155
					407157
					407159
					407161
					407163
					407168
					407169
					407170
					407171
					407172
					407173
					407174
					407175
					407176
					407177
					407178
					407179
					407180
					407181
					407183
					407186
					407187
					407188
					407189
					407190
					407194
					407196
					407201
					407203
					407204
					407205
					407209
					407210
					407211
					407213
					407215
					407216
					407217
					407218
					407219
					407220
					407221
					407222
					407223
					407224
					407225
					407226
					407227
					407228
					407229
					407230
					407231
					407234
					407235
					407236
					407237
					407238
					407239
					407240
					407241
					407767
					407768
					407769
					407770
					407771
					407772
					407995
					407996
					407997
					407998
					408000
					408001
					408002
					408003
					408005
					408006
					408007
					408008
					408009
					408010
					408013
					408015
					408016
					408017
					408018
					408019
					408020
					408021
					414274
					414345
					414346
					414347
					414348
					414349
					414350
					414732
					414735
					414920
					414921
					414922
					414925
					415110
					415111
					415112
					415113
					415114
					431784
					431786
					444858
					444859
					444860
					444861
					444863
					444865
					444866
					444867
					444868
					444869
					444870
					444872
					444874
					444875
					444877
					444878
					444879
					444880
					444881
					444987
					444988
					444990
					445364
					445416
					445417
					445418
					445419
					445420
					445421
					445422
					445423
					445424
					445425
					445463
					445543
					450206
					450212
					450214
					493637
					493638
					493639
					493640
					493642
					493643
					493644
					493645
					493686
					493708
					493709
					493710
					493711
					493713
					493714
					493716
					493717
					493719
					493720
					493722
					493724
					493725
					493726
					493728
					493729
					493731
					493733
					493736
					493737
					493738
					493777
					493779
					493988
					493989
					493992
					493993
					493998
					493999
					494004
					494116
					494318
					494548
					494549
					497011
					497012
					497013
					497014
					497015
					497016
					497017
					497018
					497019
					497020
					497021
					497022
					497023
					497024
					497025
					497026
					497029
					497030
					497031
					497032
					497199
					497200
					497202
					497203
					497204
					497205
					497206
					497207
					497208
					497226
					497620
					497621
					497622
					503551
					503552
					503553
					503554
					503555
					503575
					503577
[truncated: 28,825 more rows]

## Sheet: Sheet(B)
Oligo ID	EntrezGeneID	FDR	Foldchange(310 day vs 100 day)	p-value	Foldchange(Non-lactation vs 100day)	p-value	Foldchange(Non-lactation vs 310day)	p-value
	280686	0.05	0.222612	0.000273923	1	1	1	1
	280705	0.05	0.117143	2.08e-08	0.22797	0.00095096	1	1
	280714	0.05	0.246761	9.62e-05	0.325572	0.00073247	1	1
	280733	0.05	1	1	1	1	0.407504	9.16e-09
	280741	0.05	11.3546	0.000118847	1	1	1	1
	280763	0.05	30.744	2.14e-05	1	1	1	1
	280792	0.05	22.0952	0.000882016	1	1	1	1
	280794	0.05	0.288847	1.9e-05	0.256458	7.05e-07	1	1
	280798	0.05	1	1	0.00600679	2.64e-05	1	1
	280831	0.05	1	1	0.375338	0.000209282	1	1
	280832	0.05	0.116517	0.00049023	1	1	1	1
	280838	0.05	1	1	1	1	0.0936418	9.85e-11
	280838	0.05	35.9312	4.6e-19	1	1	0.0432117	2.55e-08
	280841	0.05	0.236518	0.000311558	1	1	1	1
	280843	0.05	33.6509	2.88e-13	3.67989	0.000262208	0.11227	3.05e-07
	280844	0.05	35.1175	1.7e-24	1	1	0.0533348	2.67e-08
	280846	0.05	1	1	0.414794	3.86e-05	1	1
	280847	0.05	1	1	0.426007	0.000399424	1	1
	280871	0.05	153.39	0.000229194	1	1	1	1
	280871	0.05	0.00177442	1.23e-15	0.00210743	5.32e-13	1	1
	280871	0.05	685.627	3.64e-17	614.013	1.6e-16	1	1
	280872	0.05	0.249107	0.000147631	1	1	1	1
	280878	0.05	1	1	1	1	102.977	0.000697482
	280924	0.05	11.5096	3.2e-05	1	1	0.0754157	5e-05
	280948	0.05	0.129201	0.00070861	1	1	1	1
	280958	0.05	1	1	0.396232	0.000992224	1	1
	280960	0.05	4.21439	4.77e-06	1	1	1	1
	280960	0.05	7.12004	4.36e-06	1	1	0.259468	0.000928701
	280960	0.05	27.9867	2.4e-08	1	1	0.0635349	8.83e-09
	280981	0.05	4.80769	9.73e-07	1	1	1	1
	280981	0.05	4.70479	1.24e-05	1	1	1	1
	280981	0.05	6.84576	1.24e-05	1	1	1	1
	281002	0.05	1	1	0.394243	0.000585171	1	1
	281035	0.05	1	1	0.415075	0.000171436	1	1
	281043	0.05	0.171793	0.000352321	1	1	1	1
	281052	0.05	19.7566	4.01e-15	1	1	1	1
	281052	0.05	7.46195	2.16e-05	1	1	0.177412	5.6e-06
	281052	0.05	5.65514	1.36e-06	1	1	0.414721	0.00085793
	281052	0.05	6.72205	0.000901034	1	1	0.341569	1.14e-10
	281054	0.05	0.275452	0.000133394	1	1	1	1
	281057	0.05	0.348921	0.000560944	1	1	1	1
	281058	0.05	0.122092	0.000712675	1	1	1	1
	281072	0.05	0.256167	0.000814373	1	1	1	1
	281092	0.05	0.120759	1.15e-05	1	1	1	1
	281099	0.05	63.1007	8.87e-15	1	1	0.0495474	7.71e-06
	281099	0.05	31.1826	7.2e-08	1	1	0.0784956	8.11e-06
	281138	0.05	2.83928	0.00070188	1	1	1	1
	281152	0.05	5.93162	1.96e-06	1	1	1	1
	281154	0.05	1	1	0.301962	4.49e-07	1	1
	281168	0.05	1	1	0.224505	0.000945838	1	1
	281187	0.05	1	1	1	1	0.331571	0.000415175
	281190	0.05	3.80592	6.84e-05	1	1	1	1
	281220	0.05	15.5938	2.49e-08	12.8873	2.14e-07	1	1
	281220	0.05	356.922	1.23e-08	1	1	1	1
	281235	0.05	1	1	1	1	0.443765	0.000491058
	281259	0.05	28.8919	4.23e-14	1	1	1	1
	281278	0.05	115.981	0.000802641	1	1	0.00432766	2.22e-08
	281285	0.05	1	1	1	1	0.168588	0.000118096
	281294	0.05	0.00447485	3.72e-07	1	1	1	1
	281311	0.05	0.0592844	0.000187694	1	1	1	1
	281333	0.05	27.5168	7.05e-15	1	1	0.0731073	4.77e-07
	281333	0.05	27.5168	7.05e-15	1	1	0.0731073	4.77e-07
	281360	0.05	3.27152	0.000348867	1	1	1	1
	281368	0.05	18.664	0.000116623	1	1	1	1
	281401	0.05	8.60806	3.13e-06	1	1	1	1
	281407	0.05	0.193551	1.84e-06	0.283995	7.9e-05	1	1
	281418	0.05	6.60217	0.000842994	11.7624	0.000432153	1	1
	281478	0.05	0.125071	1.26e-05	1	1	1	1
	281486	0.05	0.238052	0.000631253	1	1	1	1
	281490	0.05	1	1	0.220478	0.000682781	1	1
	281490	0.05	1	1	681.878	3.19e-05	1	1
	281499	0.05	1	1	1	1	0.29249	2.63e-07
	281504	0.05	3.5926	4.61e-05	2.48516	3.25e-07	1	1
	281528	0.05	0.32034	0.000702203	1	1	1	1
	281544	0.05	3.67244	0.000100955	2.27837	0.000606458	1	1
	281565	0.05	1321.4	3.16e-16	1	1	0.00231585	6.46e-15
	281565	0.05	1	1	1	1	0.0765352	0.000926355
	281585	0.05	0.165643	0.00044031	1	1	1	1
	281590	0.05	4.90323	1.45e-05	1	1	1	1
	281595	0.05	3.45057	0.000753052	1	1	1	1
	281603	0.05	1	1	1	1	315.946	0.000307733
	281603	0.05	0.00305117	8.05e-05	1	1	1	1
	281613	0.05	1	1	2.39211	0.000478872	1	1
	281630	0.05	0.00657375	1.04e-05	1	1	222.547	1.31e-07
	281688	0.05	5.22997	0.000423774	1	1	1	1
	281728	0.05	42.5199	2.33e-28	3.22743	2.83e-06	0.077826	1.69e-06
	281735	0.05	8.15437	1.06e-08	2.71583	4.34e-05	1	1
	281758	0.05	21.873	8.02e-13	1	1	0.11794	5.74e-05
	281758	0.05	93.1831	9.76e-18	1	1	0.0304081	7.23e-08
	281766	0.05	0.00660476	1.01e-05	1	1	1	1
	281767	0.05	3.23795	0.000295116	1	1	1	1
	281768	0.05	1	1	0.4635	0.000230275	1	1
	281781	0.05	4.90144	6.11e-07	1	1	1	1
	281793	0.05	3.28049	0.000879039	1	1	1	1
	281799	0.05	49.5429	0.000990357	1	1	1	1
	281799	0.05	90.5269	1.42e-06	1	1	1	1
	281839	0.05	0.252212	2.33e-05	1	1	1	1
	281862	0.05	0.266532	0.000290076	1	1	1	1
	281894	0.05	44.32	1.19e-30	2.99183	9.32e-05	1	1
	281898	0.05	4.93844	4.07e-07	1	1	1	1
	281913	0.05	6.95715	1.37e-09	2.26315	4.88e-05	0.33367	2.08e-05
	281917	0.05	13.6701	8.27e-07	1	1	0.198541	0.000755791
	281917	0.05	11.8179	9e-10	3.19097	0.000131576	1	1
	281972	0.05	0.0960089	0.00028946	1	1	1	1
	281985	0.05	0.0497171	0.000535025	1	1	1	1
	282000	0.05	1	1	0.328703	0.000132935	1	1
	282052	0.05	1	1	1	1	0.0332305	0.000154659
	282053	0.05	2.98737	0.000426789	1	1	1	1
	282068	0.05	0.298556	0.000431786	0.251055	1.8e-06	1	1
	282072	0.05	72.0333	1.64e-08	1	1	0.0512138	7.88e-05
	282118	0.05	0.125568	5.76e-07	1	1	1	1
	282124	0.05	0.135871	3.04e-05	1	1	1	1
	282135	0.05	0.128033	0.000164777	1	1	1	1
	282137	0.05	17.5568	0.000545087	1	1	0.139554	4e-09
	282141	0.05	0.176222	0.00083781	1	1	1	1
	282187	0.05	1	1	0.301711	3.3e-05	0.401387	6.46e-06
	282188	0.05	1	1	0.281722	7.41e-05	0.459278	0.000931995
	282191	0.05	1	1	1	1	0.465788	0.00068586
	282194	0.05	1	1	0.452363	1.09e-05	1	1
	282201	0.05	1	1	0.149147	7.94e-06	1	1
	282208	0.05	45.5961	7.11e-11	1	1	0.0762946	4.86e-05
	282208	0.05	925.523	4.82e-05	1	1	0.000884777	2.9e-13
	282208	0.05	40.4564	1.59e-30	2.854	1.22e-06	0.0721775	0.000162362
	282209	0.05	0.00145075	1.67e-13	1	1	11.361	9.04e-06
	282209	0.05	71.2068	3.71e-30	3.39975	3.23e-07	0.0488519	4.25e-05
	282209	0.05	544.739	1.07e-35	4.14932	4.24e-05	0.00778219	8.16e-06
	282209	0.05	40.7512	0.000905516	1	1	1	1
	282209	0.05	69.696	1.54e-12	1	1	0.0528304	1.46e-07
	282209	0.05	1	1	1	1	0.000860852	0.000128688
	282220	0.05	2.81429	0.000576253	1	1	1	1
	282220	0.05	4.20983	4.02e-05	1	1	1	1
	282223	0.05	0.00395623	1.84e-08	1	1	1	1
	282229	0.05	6.33245	0.000257927	1	1	0.197809	0.000609388
	282229	0.05	3.94147	0.000329826	1	1	1	1
	282301	0.05	0.175353	5.2e-07	0.242595	7.55e-07	1	1
	282303	0.05	1	1	0.317966	0.00086801	1	1
	282305	0.05	1	1	1	1	0.371218	9.05e-05
	282323	0.05	0.00642946	7.22e-06	1	1	1	1
	282325	0.05	0.190817	0.000319352	1	1	1	1
	282348	0.05	0.0572419	1.23e-05	1	1	6.3826	0.000317075
	282351	0.05	0.00263621	9.5e-12	0.00307758	4.89e-10	1	1
	282353	0.05	10.8296	1.5e-09	1	1	0.116738	0.000375255
	282355	0.05	3.33974	0.000558067	1	1	1	1
	282356	0.05	3.62497	0.000461377	2.33928	0.000872776	1	1
	282360	0.05	0.0052628	7.81e-07	1	1	1	1
	282361	0.05	10.1943	6.24e-07	1	1	1	1
	282367	0.05	4.40256	0.000367973	1	1	0.379247	0.000171318
	282369	0.05	1	1	1	1	0.117534	0.000121042
	282384	0.05	4.81216	0.000200717	1	1	1	1
	282401	0.05	1	1	0.286507	0.000590266	1	1
	282430	0.05	27.3528	8.53e-14	3.03403	0.000603501	1	1
	282480	0.05	2.86201	0.000737849	1	1	1	1
	282484	0.05	43.7209	7.24e-21	6.57821	1.77e-09	0.154609	5.73e-07
	282484	0.05	220.289	0.0003351	196.072	0.00039199	1	1
	282521	0.05	0.241414	0.000383796	1	1	1	1
	282644	0.05	0.228036	0.000876623	1	1	1	1
	282644	0.05	0.0063676	7.17e-06	1	1	1	1
	282662	0.05	0.174393	1.54e-07	0.205176	2.95e-08	1	1
	282856	0.05	1	1	1	1	0.317429	0.000336371
	282858	0.05	0.230564	1.39e-05	1	1	1	1
	282871	0.05	0.0189221	3.74e-05	1	1	1	1
	282872	0.05	0.308085	3.95e-05	1	1	1	1
	282873	0.05	3.94102	1.67e-05	2.32912	0.00017523	1	1
	282877	0.05	3.37407	9.05e-05	2.14469	3.24e-05	1	1
	282882	0.05	0.0698743	6.24e-06	1	1	1	1
	282884	0.05	3.17683	0.000734238	1	1	1	1
	286767	0.05	362.135	1.63e-14	1	1	0.00581493	2.12e-06
	286767	0.05	65.3686	0.000724179	1	1	1	1
	286767	0.05	51.3511	3.36e-05	1	1	1	1
	286790	0.05	3.51224	8.71e-05	1	1	1	1
	286809	0.05	3.43791	0.000744732	1	1	1	1
	286839	0.05	3.56785	9.6e-05	2.00495	0.000507547	1	1
	286839	0.05	9.25079	0.000502827	1	1	1	1
	286849	0.05	0.00855774	0.000138343	1	1	1	1
	286867	0.05	3.25174	0.000190107	1	1	1	1
	286868	0.05	2.80504	0.000956496	1	1	1	1
	286869	0.05	0.152617	0.000201159	1	1	1	1
	286884	0.05	3.26441	0.000848596	1	1	1	1
	317697	0.05	1	1	0.00304225	0.00054562	1	1
	317697	0.05	0.330691	0.00076218	1	1	1	1
	317704	0.05	0.0576802	0.000462673	1	1	1	1
	317777	0.05	1	1	0.00456951	4.41e-07	1	1
	326576	0.05	13.4673	4.07e-09	1	1	0.150087	2.27e-07
	326579	0.05	3.75561	3.99e-05	2.63512	2.66e-05	1	1
	326599	0.05	4.18254	0.000503924	1	1	1	1
	326599	0.05	3.49286	1.56e-05	2.17375	6.62e-05	1	1
	326602	0.05	2.9538	0.000786166	1	1	1	1
	327666	0.05	0.221121	0.000754374	1	1	1	1
	327681	0.05	4.46175	0.000798427	1	1	1	1
	327711	0.05	0.00589458	2.79e-06	1	1	1	1
	337918	0.05	1	1	0.253556	0.000427516	1	1
	337919	0.05	15.301	1.28e-07	1	1	0.0785586	4.59e-07
	338050	0.05	0.183419	5.97e-05	1	1	1	1
	338068	0.05	270.067	0.000787793	1	1	1	1
	338071	0.05	0.210424	0.000540872	1	1	1	1
	338074	0.05	0.263495	5.58e-05	1	1	2.05702	4.01e-06
	338100	0.05	0.0103141	0.000575434	1	1	141.641	4.48e-05
	338419	0.05	10.074	5.51e-06	1	1	1	1
	347699	0.05	0.161346	0.000328785	1	1	1	1
	347699	0.05	0.113067	5.74e-06	1	1	1	1
	353115	0.05	4.06565	4.56e-06	1	1	0.438469	8.63e-06
	353160	0.05	281.128	0.000166026	1	1	0.00252019	0.000281361
	360197	0.05	9.46184	1.1e-09	1	1	0.240889	2.21e-05
	404098	0.05	2.85662	0.000907957	1	1	1	1
	404140	0.05	3.30602	0.000231652	1	1	1	1
	404142	0.05	3.04462	0.000561452	1	1	1	1
	404190	0.05	3.28354	0.000588023	1	1	1	1
	404191	0.05	0.270876	0.000988168	1	1	1	1
	404548	0.05	27.5437	5.82e-06	1	1	1	1
	404548	0.05	1	1	1	1	0.00966146	0.000497587
	407121	0.05	25.7556	0.000774417	1	1	1	1
	407121	0.05	5.52366	7.61e-05	1	1	1	1
	407125	0.05	1	1	0.281345	6.03e-06	1	1
	407152	0.05	0.209002	3.18e-06	1	1	1	1
	407229	0.05	1	1	0.0911646	0.000598813	1	1
	407236	0.05	0.0268241	2.68e-06	1	1	1	1
	407236	0.05	0.336613	0.000523785	1	1	1	1
	408001	0.05	1	1	2.23418	0.000959115	1	1
	414345	0.05	1	1	1	1	3.93539	0.000112609
	414347	0.05	0.172389	0.000782637	1	1	1	1
	415112	0.05	11.6542	4.57e-06	1	1	1	1
	444858	0.05	1	1	1	1	0.00104283	0.000296843
	444863	0.05	0.00538227	9.68e-07	1	1	1	1
	444872	0.05	1	1	0.38988	0.000436132	1	1
	445364	0.05	4.60891	0.000264273	1	1	1	1
	445417	0.05	0.127052	9.03e-08	0.148571	8.16e-06	1	1
	445425	0.05	3.56337	6.1e-05	1	1	1	1
	493998	0.05	0.272586	0.000531598	1	1	1	1
	497032	0.05	1	1	1	1	297.856	0.000340136
	497200	0.05	0.0944656	1.35e-06	1	1	1	1
	497200	0.05	0.0615484	2.81e-06	1	1	1	1
	497202	0.05	1	1	1	1	0.037612	1.63e-17
	497202	0.05	1	1	1	1	0.174688	4.32e-08
	497204	0.05	0.0781434	2.2e-05	1	1	1	1
	503579	0.05	0.134712	0.000178456	1	1	1	1
	504288	0.05	1	1	0.421502	0.000815871	1	1
	504294	0.05	12.6133	2.58e-07	1	1	0.139266	0.000996631
	504364	0.05	1	1	0.00819155	0.000316041	1	1
	504393	0.05	4.7843	0.000415668	1	1	1	1
	504413	0.05	3.40056	0.000115235	1	1	1	1
	504438	0.05	4.35418	1.54e-05	1	1	1	1
	504505	0.05	3.70083	0.000195642	2.79546	9.81e-05	1	1
	504531	0.05	0.260672	0.000735061	1	1	1	1
	504565	0.05	18.8408	8.85e-09	1	1	1	1
	504577	0.05	0.00977743	0.00038222	1	1	1	1
	504657	0.05	0.245608	4.42e-05	0.341074	0.00044859	1	1
	504741	0.05	0.323258	0.000895848	1	1	1	1
	504750	0.05	3.60653	7.13e-05	2.04397	0.000970534	1	1
	504760	0.05	0.144892	0.000287272	1	1	1	1
	504842	0.05	4.19988	6.64e-05	1	1	1	1
	504876	0.05	3.19074	0.000527506	2.12058	0.000636093	1	1
	504923	0.05	22.0821	9.06e-07	1	1	0.0959261	4.36e-07
	504954	0.05	0.243082	7.11e-05	1	1	2.207	0.000727817
	504967	0.05	0.273301	0.000319496	1	1	1	1
	504968	0.05	0.153265	1.69e-05	0.145106	2.38e-06	1	1
	504978	0.05	31.6448	6.23e-09	1	1	1	1
	504994	0.05	0.222844	1.82e-05	1	1	1	1
	505016	0.05	74.6492	0.000414068	1	1	1	1
	505016	0.05	0.00877197	0.000906295	1	1	1	1
	505040	0.05	0.273803	0.000240744	1	1	1	1
	505054	0.05	0.26492	7.35e-05	1	1	1	1
	505212	0.05	3.77634	0.000548511	1	1	1	1
	505218	0.05	12.7857	6.57e-05	1	1	1	1
	505228	0.05	176.913	0.00045095	1	1	1	1
	505369	0.05	116.141	0.000433963	1	1	1	1
	505422	0.05	1	1	1	1	0.303819	9.76e-05
	505427	0.05	1	1	0.00751368	0.000153408	1	1
	505507	0.05	3.5192	3.55e-05	1	1	1	1
	505524	0.05	1	1	1	1	0.00298759	1.9e-11
	505645	0.05	8.83215	3.46e-06	4.54892	0.000107221	1	1
	505653	0.05	0.0536908	0.000409457	1	1	1	1
	505671	0.05	0.00672271	1.96e-05	1	1	1	1
	505716	0.05	20.8093	0.000341253	1	1	1	1
	505719	0.05	558.262	5.59e-19	1	1	0.00235715	5.31e-12
	505775	0.05	10.6812	5.81e-11	1	1	0.109354	2.37e-06
	505775	0.05	235.487	2.79e-10	1	1	1	1
	505780	0.05	1	1	1	1	168.555	5.55e-06
	505787	0.05	5.14241	2.42e-07	3.01465	2.93e-05	1	1
	505941	0.05	3.81528	0.00010411	1	1	1	1
	506031	0.05	1	1	0.00481286	1.59e-06	1	1
	506043	0.05	3.63147	0.000783846	1	1	1	1
	506061	0.05	5.45327	0.000474375	1	1	1	1
	506141	0.05	1	1	1	1	150.707	0.000721855
	506229	0.05	3.07103	0.000506873	1	1	1	1
	506267	0.05	1	1	1	1	174.251	0.000482939
	506402	0.05	1	1	0.00394684	5.5e-08	1	1
	506412	0.05	9.51707	5.58e-10	3.5153	8.47e-06	0.379613	2.12e-06
	506448	0.05	0.0096905	0.00035531	1	1	1	1
	506459	0.05	4.86548	5.64e-07	1	1	0.34777	0.000533877
	506482	0.05	5.61008	4.25e-07	2.75603	1.78e-05	1	1
	506501	0.05	1	1	1	1	244.813	0.000886972
	506530	0.05	3.41479	0.000450545	1	1	1	1
	506539	0.05	1	1	1	1	24.6317	0.000920438
	506550	0.05	13.1338	1.14e-10	1	1	0.14843	3.67e-06
	506569	0.05	0.228258	0.000458565	1	1	1	1
	506622	0.05	4.16946	0.000759203	3.16454	0.00059577	1	1
	506636	0.05	0.0985411	1.5e-06	0.133644	0.000198009	1	1
	506753	0.05	3.06448	0.00041723	2.2503	0.000130939	1	1
	506768	0.05	4.94951	3.67e-07	1	1	1	1
	506787	0.05	0.00256655	5.11e-12	0.00430586	2.08e-07	1	1
	506787	0.05	200.15	3.23e-09	1	1	1	1
	506939	0.05	1	1	160.211	0.000434222	1	1
	506973	0.05	3.07267	0.000774574	1	1	1	1
	506988	0.05	3.98596	0.000113069	1	1	1	1
	506990	0.05	3.95831	0.000435065	1	1	1	1
	506995	0.05	0.351599	0.000729035	0.340057	1.22e-05	1	1
	506997	0.05	24.4569	0.000241836	1	1	0.0424693	7.82e-05
	507012	0.05	1	1	0.384837	0.000352535	1	1
	507035	0.05	0.0042283	3.42e-08	0.00334315	2.5e-09	1	1
	507035	0.05	396.784	5.54e-16	354.672	1.56e-13	1	1
	507051	0.05	1	1	1	1	8.28441	0.000636619
	507054	0.05	0.00837884	0.000111043	1	1	1	1
	507082	0.05	0.233915	0.000492581	1	1	1	1
	507138	0.05	0.192307	0.000408711	1	1	1	1
	507210	0.05	4.3389	7.73e-05	1	1	1	1
	507226	0.05	1	1	1	1	156.483	0.000232617
	507297	0.05	0.00550198	1.38e-06	1	1	1	1
	507329	0.05	0.219343	6.07e-05	1	1	1	1
	507339	0.05	0.130452	3.3e-08	1	1	1	1
	507365	0.05	2.93004	0.000312477	1	1	1	1
	507421	0.05	82.6544	1.02e-05	1	1	0.0168878	0.000474418
	507455	0.05	5.26927	7.95e-05	1	1	0.292018	0.000965623
	507462	0.05	0.00532741	8.05e-07	0.00572922	9.89e-06	1	1
	507484	0.05	3.16856	0.000199389	2.10298	9.71e-05	1	1
	507516	0.05	211.83	0.000419421	1	1	1	1
	507575	0.05	1	1	1	1	0.0704117	1.04e-05
	507596	0.05	1	1	60.3767	0.000418689	1	1
	507622	0.05	0.00593255	6.33e-05	1	1	1	1
	507624	0.05	0.139749	7.66e-06	1	1	1	1
	507708	0.05	5.03002	3.67e-05	1	1	0.300098	0.000105729
	507801	0.05	0.190062	0.000954051	1	1	42.0277	2.94e-15
	507801	0.05	201.45	0.000971946	1	1	0.00324553	0.000382667
	507865	0.05	0.0403941	0.000875714	1	1	1	1
	507865	0.05	0.0686423	0.000311668	1	1	1	1
	507865	0.05	157.596	0.000610059	140.245	0.000712534	1	1
	508014	0.05	113.809	4.49e-06	1	1	1	1
	508028	0.05	4.858	3.73e-05	1	1	1	1
	508076	0.05	1	1	0.449471	0.000106857	1	1
	508078	0.05	1	1	0.00347633	5.47e-08	1	1
	508105	0.05	0.142989	3.46e-06	1	1	1	1
	508193	0.05	9.64176	4.98e-12	2.78705	4.83e-08	0.296601	1.16e-06
	508204	0.05	0.147131	0.00071205	1	1	1	1
	508221	0.05	3.44496	0.000150749	1	1	1	1
	508251	0.05	0.267162	0.000652859	0.220108	2.45e-06	1	1
	508378	0.05	0.0103055	0.000595448	1	1	1	1
	508493	0.05	1	1	2.59629	6.56e-05	1	1
	508550	0.05	4.09213	0.00016525	1	1	1	1
	508557	0.05	359.565	0.000879461	1	1	0.00141141	0.000109147
	508582	0.05	0.00197874	1.53e-14	0.00270361	2.42e-11	1	1
	508582	0.05	233.082	4.1e-11	208.454	1.21e-08	1	1
	508607	0.05	0.00822451	8.92e-05	1	1	1	1
	508671	0.05	5.88918	0.00050791	1	1	1	1
	508720	0.05	0.208402	0.000894952	1	1	1	1
	508790	0.05	33.8016	2.39e-12	3.46494	0.000335347	0.105274	8.22e-07
	508790	0.05	31.7456	6.08e-18	1	1	0.0681396	1.32e-05
	508800	0.05	1	1	1	1	0.180337	1.96e-06
	508840	0.05	1	1	1	1	0.00378268	0.000244316
	508852	0.05	1	1	1	1	176	0.000606308
	508881	0.05	4.29872	1.17e-05	2.15072	0.000347664	1	1
	508941	0.05	0.21008	0.000827352	0.124145	3.76e-10	1	1
	508944	0.05	1	1	1	1	298.28	5.39e-10
	508944	0.05	1	1	1	1	0.165136	0.000997545
	509003	0.05	4.54039	0.000152903	1	1	1	1
	509056	0.05	0.157612	0.00037265	1	1	1	1
	509083	0.05	0.172955	0.0005896	1	1	1	1
	509100	0.05	26.1007	1.68e-06	1	1	1	1
	509101	0.05	12.5536	4.94e-10	5.47573	1.19e-07	1	1
	509290	0.05	83.3403	5.76e-15	3.93569	0.000414567	0.0483364	0.000271264
	509290	0.05	25.5335	1.52e-13	3.86472	1.13e-05	1	1
	509418	0.05	0.278607	6.28e-05	1	1	1	1
	509420	0.05	7.12645	0.000321912	1	1	1	1
	509426	0.05	3.43773	0.000133876	1	1	1	1
	509461	0.05	0.114653	1.41e-06	1	1	1	1
	509463	0.05	18.3648	6.79e-09	1	1	0.0916206	3.55e-07
	509566	0.05	1	1	2.38221	0.000183788	1	1
	509578	0.05	0.132734	0.000186909	1	1	1	1
	509596	0.05	188.842	9.02e-09	1	1	1	1
	509596	0.05	124.586	0.000858256	1	1	1	1
	509600	0.05	0.236104	0.000256418	1	1	1	1
	509764	0.05	3.21424	0.000284062	2.18512	2.16e-05	1	1
	509775	0.05	1	1	2.50656	0.000450332	1	1
	509784	0.05	0.00210008	6.4e-14	1	1	4.13437	2.08e-05
	509784	0.05	1	1	1	1	0.0704538	0.000521692
	509855	0.05	0.00825905	9.56e-05	1	1	1	1
	509965	0.05	3.2881	0.000941719	1	1	1	1
	509974	0.05	0.0835633	8.4e-05	1	1	1	1
	510102	0.05	0.157836	0.000118292	1	1	1	1
	510154	0.05	3.84717	1.84e-05	2.72093	3.47e-07	1	1
	510156	0.05	0.205177	9.86e-06	1	1	1	1
	510267	0.05	8.21259	3.07e-05	1	1	1	1
	510316	0.05	1	1	458.643	0.00010477	864.144	1.18e-27
	510316	0.05	1	1	1	1	0.121049	1.27e-10
	510322	0.05	1	1	1	1	158.93	1.03e-05
	510329	0.05	54.828	2.09e-15	3.37799	0.000298034	0.0631303	3.85e-05
	510366	0.05	1	1	1	1	0.00750124	0.000577724
	510377	0.05	0.0186803	9.75e-11	0.0188777	7.01e-11	1	1
	510377	0.05	311.703	3.31e-07	278.305	4.22e-07	1	1
	510395	0.05	1	1	147.543	8.68e-06	1	1
	510395	0.05	1	1	0.0200778	5.59e-09	1	1
	510412	0.05	5.64109	4.91e-06	1	1	1	1
	510417	0.05	1	1	1	1	2.82887	0.000140517
	510487	0.05	0.00299904	9.04e-07	0.00522549	3.47e-06	1	1
	510489	0.05	0.0599389	1.26e-05	1	1	1	1
	510492	0.05	1	1	1	1	0.33339	0.000182324
	510498	0.05	0.00714698	2.57e-05	1	1	1	1
	510532	0.05	0.179014	2.21e-05	1	1	1	1
	510549	0.05	5.07624	6.22e-07	2.15858	6.04e-05	1	1
	510554	0.05	0.0494357	3.11e-05	1	1	1	1
	510559	0.05	0.247014	1.01e-05	0.278811	1.03e-07	1	1
	510615	0.05	2.99751	0.00036368	1	1	1	1
	510749	0.05	3.83021	1.62e-05	1	1	1	1
	510751	0.05	0.207135	0.000458773	1	1	1	1
	510807	0.05	0.224881	0.000469994	1	1	1	1
	510813	0.05	0.00732847	9.73e-05	1	1	1	1
	510814	0.05	0.334578	0.000188453	1	1	1	1
	510833	0.05	1	1	0.260462	6.71e-05	0.374897	0.000293619
	510842	0.05	3.26981	0.000475173	2.78566	0.000110281	1	1
	510852	0.05	1	1	1	1	0.00448871	0.000982898
	510910	0.05	0.00250214	3.14e-12	0.00390602	0.000193971	1	1
	510910	0.05	76.0248	0.000319962	1	1	1	1
	510977	0.05	0.205934	0.000282314	0.236514	0.000356337	1	1
	510988	0.05	0.0253312	0.000972073	1	1	1	1
	511041	0.05	1	1	259.624	7.89e-07	207.499	4.04e-07
	511051	0.05	4.59315	6.47e-05	1	1	1	1
	511051	0.05	2.8139	0.000993855	1	1	1	1
	511061	0.05	95.4159	2.13e-06	1	1	0.0463304	0.000464525
	511082	0.05	1	1	2.49449	0.000949273	1	1
	511121	0.05	1	1	1	1	0.00618594	0.000689554
	511160	0.05	7.67101	8.76e-10	2.63312	3.48e-07	0.352227	3.55e-05
	511168	0.05	0.00637838	6.87e-06	1	1	1	1
	511197	0.05	1	1	1	1	0.00609118	0.000618161
	511230	0.05	0.00969871	0.000366538	1	1	1	1
	511233	0.05	0.00708891	2.19e-05	1	1	206.48	3.79e-07
	511254	0.05	0.00614739	5.35e-06	1	1	1	1
	511280	0.05	574.881	3.13e-21	18.4051	2.43e-10	1	1
	511280	0.05	0.0019054	6.78e-15	0.00359209	1.1e-08	1	1
	511291	0.05	7.93048	6.96e-07	1	1	1	1
	511373	0.05	0.169117	0.000545065	1	1	1	1
	511422	0.05	1	1	0.472914	9.83e-06	1	1
	511433	0.05	0.00596945	3.42e-06	1	1	1	1
	511433	0.05	1	1	0.00231261	4.33e-13	1	1
	511453	0.05	3.43468	0.00058245	1	1	1	1
	511461	0.05	0.00349739	5.14e-06	1	1	1	1
	511492	0.05	7.95815	0.000100816	1	1	1	1
	511566	0.05	1	1	0.367598	0.000733607	1	1
	511581	0.05	0.297131	2.42e-05	0.347659	3.65e-06	1	1
	511583	0.05	1	1	1	1	0.0045192	0.000529893
	511614	0.05	5.945	4.84e-06	1	1	0.440712	2.81e-05
	511629	0.05	339.825	4.34e-05	1	1	0.00381008	0.000140473
	511631	0.05	1	1	4.20032	0.000155709	1	1
	511674	0.05	0.0362279	1.47e-06	1	1	1	1
	511690	0.05	5.13303	6e-07	2.39255	9.38e-06	1	1
	511707	0.05	12.8935	0.000313531	1	1	1	1
	511711	0.05	0.280876	0.000642442	1	1	1	1
	511800	0.05	4.72206	2.18e-05	2.7593	0.000911555	1	1
	511826	0.05	0.00103836	1.04e-13	1	1	75.6197	1.78e-11
	511852	0.05	224.606	0.000513555	1	1	1	1
	511885	0.05	4.89194	0.000419676	1	1	1	1
	511899	0.05	6.50944	0.000240116	1	1	1	1
	511941	0.05	18.4929	1.03e-12	1	1	0.0841112	1.5e-05
	511947	0.05	0.0269446	0.000108401	1	1	1	1
	511990	0.05	0.0112527	4.06e-09	1	1	4.56697	0.000530142
	512002	0.05	3.87094	0.000290859	1	1	1	1
	512010	0.05	0.00247987	2.36e-12	0.00427148	1.69e-07	1	1
	512010	0.05	89.1295	0.000117208	1	1	1	1
	512045	0.05	41.1241	3.86e-06	11.3216	0.000316066	1	1
	512078	0.05	0.00644103	8.45e-06	1	1	1	1
	512359	0.05	10.4933	2.73e-09	1	1	1	1
	512377	0.05	4.66758	1.29e-05	2.50645	0.00015633	1	1
	512443	0.05	67.9269	0.000761332	1	1	1	1
	512506	0.05	1	1	1	1	0.0072159	4.17e-05
	512534	0.05	8.48306	6.04e-05	1	1	0.291291	5.17e-05
	512610	0.05	3.69283	0.00075108	1	1	1	1
	512672	0.05	0.0102131	0.000529813	1	1	1	1
	512693	0.05	1	1	1	1	9.24761	1.75e-05
	512745	0.05	3.08614	0.000593939	1	1	1	1
	512866	0.05	1	1	1	1	0.0103243	0.000865069
	512866	0.05	1	1	0.00432645	5.05e-05	1	1
	512872	0.05	3.28569	0.000224547	1	1	0.368816	2.73e-05
	512905	0.05	75.3006	0.000755277	1	1	1	1
	512960	0.05	0.0514367	2.52e-06	1	1	1	1
	512972	0.05	0.212586	0.000607507	1	1	1	1
	512975	0.05	3.37506	0.000170867	1	1	1	1
	512995	0.05	4.50656	1.71e-06	2.4224	1.55e-06	1	1
	513038	0.05	0.337192	0.000851452	1	1	1	1
	513053	0.05	0.193359	0.000216637	1	1	1	1
	513105	0.05	6.44547	5.43e-09	3.20382	3.86e-11	1	1
	513116	0.05	1	1	207.109	0.000372784	381.7	0.000245247
	513128	0.05	3.55996	0.000326573	1	1	1	1
	513129	0.05	1	1	0.00390829	3.89e-08	1	1
	513150	0.05	0.112018	0.000509866	1	1	1	1
	513158	0.05	4.79337	5.94e-05	1	1	1	1
	513197	0.05	0.0912433	2.32e-05	1	1	1	1
	513209	0.05	1	1	1	1	122.337	0.000200781
	513220	0.05	0.0837699	3.33e-07	1	1	1	1
	513223	0.05	6.027	2.87e-06	2.68215	0.000389491	1	1
	513278	0.05	0.116824	4.5e-06	1	1	7.9684	2.47e-09
	513278	0.05	1	1	1	1	0.193318	7.48e-05
	513303	0.05	3.78943	7.71e-05	2.52152	0.000394254	1	1
	513412	0.05	6.188	3.29e-05	1	1	1	1
	513423	0.05	26.8881	1.15e-11	3.20247	0.000995211	1	1
	513430	0.05	0.0219512	7.53e-07	1	1	1	1
	513482	0.05	68.3957	0.000852466	1	1	1	1
	513562	0.05	0.00703464	0.000745086	1	1	1	1
	513572	0.05	0.208173	0.000120581	1	1	1	1
	513592	0.05	0.00309736	0.000202774	1	1	1	1
	513593	0.05	8.0342	0.000437449	1	1	1	1
	513593	0.05	8.0342	0.000437449	1	1	1	1
	513597	0.05	0.23237	5.23e-06	0.30329	4.73e-06	1	1
	513659	0.05	0.0281997	5.46e-14	1	1	3.86834	0.000124991
	513700	0.05	0.00265741	1.2e-11	1	1	6.2007	0.000186278
	513730	0.05	1	1	0.363109	1.44e-06	1	1
	513774	0.05	0.253047	0.000152171	0.329904	0.0007772	1	1
	513856	0.05	0.260938	1.55e-05	0.339551	5.87e-07	1	1
	513857	0.05	10.724	9.22e-05	25.88	3.77e-05	1	1
	513908	0.05	0.00688003	6.24e-06	1	1	1	1
	513944	0.05	1	1	1297.14	2.52e-16	856.366	1.48e-27
	513953	0.05	0.00394409	1.18e-08	1	1	1	1
	513953	0.05	1	1	1	1	166.857	6.52e-06
	513959	0.05	0.00668307	1.18e-05	1	1	218.8	1.51e-07
	513959	0.05	1	1	1	1	0.037273	1.69e-06
	513990	0.05	0.126446	8.5e-11	1	1	1	1
	514011	0.05	115.756	5.37e-06	1	1	1	1
	514013	0.05	0.0101606	0.000509109	1	1	1	1
	514013	0.05	1	1	1	1	100.676	0.000939512
	514036	0.05	10.373	7.99e-09	1	1	0.166949	0.000404531
	514046	0.05	3.19272	0.0001438	1	1	1	1
	514078	0.05	3.65429	5.7e-05	1	1	1	1
	514159	0.05	0.0591504	1.54e-05	1	1	1	1
	514205	0.05	0.151536	2.28e-06	1	1	1	1
	514295	0.05	1	1	1	1	0.00879635	0.000202097
	514323	0.05	1	1	3.41792	8.84e-07	1	1
	514364	0.05	110.296	0.000423423	1	1	0.00652583	1.18e-05
	514387	0.05	0.0062179	4.7e-05	0.00274724	5.25e-05	1	1
	514399	0.05	8.28661	2.42e-09	2.48315	0.000227255	0.307573	2.86e-05
	514399	0.05	0.00359114	1.26e-06	1	1	381.106	7.98e-08
	514423	0.05	3.08639	0.000666463	2.18538	0.000135028	1	1
	514462	0.05	6.53543	5.48e-09	3.70945	6.39e-10	1	1
	514474	0.05	0.00341431	0.000987162	1	1	1	1
	514521	0.05	5.38266	6.06e-08	2.24495	3.84e-05	0.427991	0.000302041
	514547	0.05	4.20713	9.04e-05	1	1	1	1
	514569	0.05	3.72686	0.000934793	1	1	1	1
	514588	0.05	1	1	0.364154	7.23e-06	1	1
	514720	0.05	0.211666	1.49e-05	0.254884	0.00042307	1	1
	514741	0.05	8.60168	1.97e-10	2.89034	8.42e-06	0.344851	3.56e-08
	514786	0.05	1	1	233.261	0.000314074	1	1
	514889	0.05	1	1	2.44113	2.77e-06	1	1
	514906	0.05	0.144271	0.000667222	1	1	1	1
	515091	0.05	0.261669	0.00025328	1	1	1	1
	515128	0.05	1	1	1	1	0.344367	0.000121896
	515200	0.05	0.0904496	4.6e-06	1	1	1	1
	515204	0.05	1	1	1	1	6.58684	0.000215343
	515224	0.05	28.0332	0.000879801	1	1	1	1
	515235	0.05	1	1	0.181669	0.000147468	1	1
	515270	0.05	4.89071	6.88e-05	1	1	1	1
	515305	0.05	6.34409	0.000274902	1	1	1	1
	515440	0.05	0.143142	1.88e-06	1	1	1	1
	515501	0.05	0.00508818	4.7e-07	1	1	1	1
	515515	0.05	112.967	7.3e-06	1	1	1	1
	515534	0.05	3.40593	6.56e-05	1	1	1	1
	515640	0.05	1	1	1	1	260.92	6.95e-09
	515648	0.05	165.806	0.000193532	1	1	1	1
	515654	0.05	8.77569	5.59e-08	1	1	0.272707	7.23e-07
	515675	0.05	16.336	4.65e-06	1	1	0.170753	0.000335492
	515696	0.05	6.51234	0.000462288	1	1	1	1
	515893	0.05	9.40114	7.25e-05	1	1	1	1
	515911	0.05	0.112327	0.000254715	1	1	1	1
	515914	0.05	0.25549	1.62e-05	0.223893	1.37e-07	1	1
	515918	0.05	0.00741952	3.52e-05	1	1	197.013	7.99e-07
	515918	0.05	66.2467	0.000692036	1	1	0.00245603	4.62e-14
	515994	0.05	102.159	1.35e-06	53.1112	0.000108055	1	1
	516021	0.05	0.00167972	2.84e-16	1	1	1	1
	516021	0.05	1	1	1	1	0.00466183	0.000420408
	516063	0.05	2.96484	0.000927824	1	1	1	1
	516067	0.05	1	1	1	1	0.14065	0.000101854
	516067	0.05	14.5334	5.89e-14	2.47222	3.54e-05	0.17469	2.75e-13
	516072	0.05	8.10256	6.51e-06	1	1	0.163167	1.05e-07
	516104	0.05	1	1	1	1	4.62283	0.000107913
	516237	0.05	22.9449	1.35e-06	1	1	1	1
	516258	0.05	1	1	1	1	239.285	2.85e-08
	516258	0.05	1	1	1	1	0.159048	0.00030934
	516332	0.05	0.003808	0.000969513	1	1	1	1
	516334	0.05	3.86929	0.000548521	1	1	1	1
	516405	0.05	0.186271	0.000613028	1	1	1	1
	516426	0.05	0.26414	0.000800921	1	1	1	1
	516462	0.05	9.06962	2.53e-09	8.44417	9.02e-11	1	1
	516462	0.05	0.231897	3.43e-06	0.244455	0.000148524	1	1
	516473	0.05	3.06955	0.000329637	2.12361	0.000378456	1	1
	516483	0.05	55.1378	7.95e-07	17.2382	4.02e-05	1	1
	516540	0.05	221.885	2.17e-10	198.582	4.53e-08	1	1
	516781	0.05	1	1	1	1	417.257	0.000262457
	516885	0.05	1	1	10.4119	2.97e-05	7.42478	9.15e-05
	516921	0.05	11.128	4.61e-07	1	1	0.194469	0.000477861
	516949	0.05	0.162463	8.6e-08	1	1	1	1
	517059	0.05	72.2047	0.000294204	1	1	1	1
	517059	0.05	79.9984	9.66e-05	1	1	1	1
	517397	0.05	1	1	1	1	263.113	0.000611161
	517446	0.05	3.22361	0.000530421	1	1	1	1
	517669	0.05	1	1	1	1	0.065765	1.19e-06
	517961	0.05	3.35754	0.000318035	2.20246	0.000333212	1	1
	517979	0.05	1	1	1	1	197.807	0.000535171
	517987	0.05	3.79099	0.000192481	1	1	1	1
	518168	0.05	0.197957	5.23e-05	1	1	1	1
	518246	0.05	6.00939	1.85e-05	1	1	1	1
	518260	0.05	1	1	124.614	0.000422016	403.324	2.14e-13
	518260	0.05	1	1	1	1	0.00306262	1.63e-11
	518356	0.05	0.270381	0.000563709	1	1	1	1
	518659	0.05	1	1	1	1	114.791	0.000309861
	518976	0.05	3.23427	0.000471703	1	1	1	1
	519758	0.05	0.262674	0.000104632	1	1	1	1
	519918	0.05	263.899	0.000177277	236.96	0.000222206	1	1
	519922	0.05	0.146783	1.12e-06	1	1	1	1
	520027	0.05	3.38866	0.00065179	1	1	1	1
	520030	0.05	1	1	0.42372	0.000605894	1	1
	520302	0.05	1	1	1	1	0.00639462	7.54e-06
	520313	0.05	1	1	0.00736435	0.000137562	1	1
	520387	0.05	1	1	0.00893444	0.000694093	1	1
	520462	0.05	1	1	1	1	0.483912	1.96e-05
	520463	0.05	5.61272	9.53e-07	2.74991	2.81e-05	1	1
	520774	0.05	1	1	1	1	0.009242	0.000285362
	520925	0.05	11.0164	0.000232576	1	1	0.112014	0.00033932
	520936	0.05	8.1575	5.51e-08	3.21032	0.000836296	1	1
	521261	0.05	1	1	1	1	251.118	0.000448456
	521378	0.05	4.29378	4.26e-06	2.73092	1.1e-06	1	1
	521554	0.05	0.2163	6.21e-05	1	1	3.18928	0.000104758
	521728	0.05	512.113	9.48e-13	1	1	1	1
	521834	0.05	0.00694697	1.79e-05	1	1	1	1
	522002	0.05	0.183918	0.000219824	1	1	1	1
	522018	0.05	7.58087	1.03e-06	3.12266	0.000544475	1	1
	522155	0.05	0.30872	0.000202218	0.413896	0.000419531	1	1
	522184	0.05	1	1	1	1	0.227927	0.000161027
	522188	0.05	159.72	2.07e-07	1	1	1	1
	522311	0.05	0.168455	0.000763094	1	1	1	1
	522462	0.05	5.68631	2.42e-07	2.27174	6.82e-05	0.410195	6.14e-07
	522721	0.05	0.00612785	4.89e-06	1	1	1	1
	522795	0.05	0.2736	0.000430071	0.278318	0.00010316	1	1
	522928	0.05	0.00350774	6.65e-08	1	1	1	1
	523107	0.05	5.53422	0.000121077	1	1	1	1
	523441	0.05	1	1	1	1	0.00191665	0.000315729
	523694	0.05	5.50563	5.11e-07	1	1	0.359747	6.96e-05
	523797	0.05	3.31153	0.000516076	1	1	1	1
	523898	0.05	1	1	1	1	0.00656962	1.16e-05
	524184	0.05	0.00286312	4.98e-11	1	1	1	1
	524184	0.05	8.11429	0.000138765	1	1	1	1
	524255	0.05	0.277501	0.0003588	0.279216	0.000143161	1	1
	524530	0.05	0.261114	0.000100352	1	1	1	1
	524806	0.05	5.27006	0.00038882	1	1	1	1
	525011	0.05	0.00934513	0.000266366	1	1	1	1
	525059	0.05	15.8945	0.000359584	1	1	1	1
	525080	0.05	1	1	127.941	0.000943998	1	1
	525093	0.05	0.00927446	0.000234126	1	1	1	1
	525093	0.05	1	1	1	1	0.00737464	0.000791128
	525364	0.05	79.1677	1.95e-10	7.52637	4.47e-05	0.0974292	0.00080129
	525727	0.05	0.00921798	0.000237366	1	1	1	1
	525772	0.05	0.152289	0.000211831	0.157413	0.000626367	1	1
	525906	0.05	0.134078	1.11e-06	0.191224	0.000393759	1	1
	525906	0.05	71.4412	0.000705702	1	1	1	1
	526135	0.05	0.0111186	0.000961799	1	1	1	1
	526377	0.05	1	1	120.068	0.000929583	1	1
	526516	0.05	1	1	164.302	1.77e-06	1	1
	526639	0.05	26.3673	2.17e-07	1	1	0.175352	2.52e-05
	526766	0.05	76.2851	2.19e-29	2.68552	2.94e-07	0.0359969	8.91e-09
	526873	0.05	0.234636	0.000234061	0.268269	0.000521456	1	1
	526873	0.05	0.217693	0.000301971	1	1	1	1
	526887	0.05	0.00835283	0.000100639	1	1	1	1
	526890	0.05	135.297	1.53e-14	1	1	0.0187235	5.07e-07
	527048	0.05	44.8471	1.53e-13	1	1	1	1
	527153	0.05	1	1	192.091	0.000403268	1	1
	527165	0.05	0.297503	0.000585907	0.317506	9.35e-05	1	1
	527379	0.05	0.00486055	2.59e-07	1	1	1	1
	527410	0.05	0.269666	0.000140039	1	1	1	1
	527470	0.05	4.33897	1.06e-05	2.20228	0.000862028	1	1
	527740	0.05	1	1	0.00438363	2.64e-07	1	1
	527740	0.05	1	1	141.599	6.53e-06	226.379	0.000571776
	527790	0.05	0.00453601	9.88e-08	1	1	1	1
	527885	0.05	4.40997	2.94e-05	2.3443	0.000708231	1	1
	527964	0.05	166.99	0.00015718	1	1	1	1
	528153	0.05	0.00460983	1.32e-07	0.00670329	0.000141647	1	1
	528379	0.05	29.8902	5.97e-17	3.38949	2.02e-06	1	1
	528530	0.05	5.11897	0.000770319	1	1	0.234951	8.57e-07
	528871	0.05	0.0647035	0.000204934	1	1	1	1
	528986	0.05	0.00552416	1.38e-06	1	1	1	1
	528986	0.05	0.00818867	9.01e-05	1	1	1	1
	529002	0.05	4.10817	1.79e-05	1	1	0.420837	0.000837303
	529049	0.05	1	1	0.261681	0.000349001	1	1
	529059	0.05	0.0940293	1.38e-06	1	1	1	1
	529146	0.05	172.065	2.45e-08	1	1	0.00910853	0.000288907
	529146	0.05	0.00485032	2.71e-07	1	1	1	1
	529157	0.05	1	1	0.00424212	1.58e-07	0.00266343	3.66e-13
	529157	0.05	1	1	101.021	0.000754637	379.939	1.28e-12
	529366	0.05	0.00706858	0.000866119	1	1	1	1
	529591	0.05	96.3096	1.76e-05	1	1	1	1
	529760	0.05	4.60099	0.000675382	4.40993	0.000709833	1	1
	529800	0.05	0.0214598	7.31e-09	0.0261968	0.000253813	1	1
	529947	0.05	0.264629	0.000588982	1	1	1	1
	530005	0.05	10.9259	9.8e-06	1	1	1	1
	530263	0.05	0.0108152	0.000827584	1	1	1	1
	530282	0.05	28.5314	2.19e-05	1	1	1	1
	530464	0.05	6.82024	7.01e-07	1	1	1	1
	530657	0.05	1	1	0.174694	0.000100796	1	1
	530657	0.05	1	1	0.32594	1.92e-08	1	1
	530692	0.05	3.19019	0.000945653	1	1	1	1
	530879	0.05	0.262679	0.000274807	1	1	1	1
	530910	0.05	0.00394573	1.02e-07	0.00343271	4.42e-09	1	1
	530962	0.05	0.00665784	1.16e-05	1	1	219.684	1.49e-07
	531068	0.05	0.220608	0.000329504	1	1	1	1
	531327	0.05	0.11202	0.000249168	1	1	1	1
	531343	0.05	0.208784	0.000398892	1	1	1	1
	531516	0.05	0.165903	3.63e-05	1	1	5.99797	2.52e-06
	531516	0.05	0.188519	0.000950407	1	1	1	1
	531531	0.05	135.127	1.3e-05	120.581	8.72e-05	1	1
	531531	0.05	10.8448	1.12e-12	2.06459	0.000396825	0.195106	4.01e-05
	531531	0.05	0.239118	0.000120511	1	1	1	1
	532067	0.05	3.73716	8.19e-05	1	1	0.446057	0.000455308
	532126	0.05	1	1	0.278628	0.000673496	1	1
	532219	0.05	0.19999	4.56e-06	1	1	1	1
	532262	0.05	0.00383191	8.3e-09	1	1	6.15654	0.000801044
	532376	0.05	0.30832	0.000441262	1	1	1	1
	532556	0.05	1	1	0.00534229	0.000842294	0.00338106	6.81e-05
	532556	0.05	0.00329693	6.73e-10	1	1	11.3634	2.83e-07
	532569	0.05	0.064838	0.000311572	0.0546526	0.000514609	1	1
	532578	0.05	1	1	176.486	0.000162945	249.568	3.21e-06
	532578	0.05	1	1	0.00493408	1.43e-06	1	1
	532603	0.05	1	1	1	1	0.00683696	2.25e-05
	532674	0.05	16.9283	1.46e-06	1	1	1	1
	532708	0.05	0.00576448	2.14e-06	1	1	1	1
	532713	0.05	0.00661931	8.81e-05	1	1	1	1
	532713	0.05	0.00369631	4.75e-09	1	1	1	1
	532751	0.05	0.0102919	0.000567483	1	1	1	1
	532772	0.05	1	1	0.332287	1.26e-05	1	1
	532836	0.05	1	1	1	1	0.0121349	0.000983908
	532871	0.05	7.72296	3.51e-07	1	1	0.213967	1.68e-05
	532923	0.05	1	1	1	1	0.00166622	0.000408783
	532964	0.05	0.251851	0.000375348	1	1	1	1
	533044	0.05	1	1	1	1	0.258491	8.32e-05
	533098	0.05	0.00695044	1.93e-05	1	1	1	1
	533098	0.05	11.179	0.000413814	1	1	1	1
	533166	0.05	0.17903	2.58e-06	0.278368	0.000369934	1	1
	533187	0.05	1	1	279.251	0.000181943	1	1
	533187	0.05	1	1	1	1	226.429	0.000466782
	533187	0.05	1	1	1	1	0.00279627	0.000256323
	533187	0.05	1	1	0.172218	0.000295973	1	1
	533233	0.05	0.082577	5.29e-05	1	1	1	1
	533284	0.05	5.62286	1.4e-05	1	1	1	1
	533285	0.05	3.29312	0.000206296	1	1	1	1
	533297	0.05	1	1	2.53438	7.88e-05	1	1
	533324	0.05	1	1	1	1	0.00664983	0.000603318
	533379	0.05	1	1	1	1	0.00456504	0.000615261
	533484	0.05	0.00485118	0.000160843	1	1	1	1
	533600	0.05	3.70074	9.13e-05	1	1	1	1
	533634	0.05	0.00431468	4.72e-08	1	1	1	1
	533642	0.05	5.79192	0.000121571	1	1	1	1
	533656	0.05	1	1	1	1	0.336457	3.41e-05
	533725	0.05	846.188	1.32e-05	756.816	1.59e-05	1	1
	533726	0.05	8.30499	1.05e-08	1	1	0.258126	0.000464974
	533766	0.05	46.3736	7.45e-25	2.71497	2.69e-07	0.0599685	6.66e-08
	533801	0.05	1	1	1	1	177.472	0.000729667
	533844	0.05	0.00162603	1.18e-16	0.00378087	0.000154622	1	1
	533862	0.05	1	1	1	1	3.28423	0.000320678
	533862	0.05	0.138218	0.000620883	1	1	1	1
	533892	0.05	3.55253	0.00011425	1	1	1	1
	533894	0.05	0.288486	5.31e-06	0.316068	2.87e-06	1	1
	533900	0.05	1	1	1	1	0.0118938	0.00091288
	533907	0.05	6.72232	1.72e-06	1	1	1	1
	533968	0.05	1	1	0.0035454	7.78e-09	1	1
	533968	0.05	1	1	0.0011698	3.7e-07	1	1
	534013	0.05	1	1	0.00411429	9.21e-08	0.0363897	6.02e-09
	534049	0.05	0.0638736	7.13e-06	1	1	1	1
	534072	0.05	1	1	0.00796409	0.00055759	1	1
	534073	0.05	0.00812841	7.99e-05	1	1	1	1
	534073	0.05	0.00281639	2.41e-06	1	1	1	1
	534090	0.05	28.0049	2.01e-07	1	1	1	1
	534164	0.05	0.205506	0.000795362	1	1	1	1
	534279	0.05	3.1864	0.000701343	1	1	1	1
	534319	0.05	1	1	0.344827	2.79e-05	1	1
	534329	0.05	4.67559	0.000791208	1	1	1	1
	534419	0.05	1	1	1	1	0.401217	0.000123755
	534432	0.05	171.939	0.000846306	1	1	1	1
	534434	0.05	1	1	1	1	553.944	5.68e-05
	534434	0.05	1	1	0.00307257	4.57e-10	1	1
	534506	0.05	1	1	0.00389303	0.000845598	1	1
	534513	0.05	0.00512388	0.000127653	1	1	1	1
	534578	0.05	0.00134164	6.98e-19	0.00394175	0.000977235	1	1
	534629	0.05	7.73715	1.04e-07	3.06034	0.000148006	1	1
	534669	0.05	0.00217221	3.17e-12	0.00217056	0.000359168	1	1
	534672	0.05	3.79092	2.46e-05	2.13956	0.00064921	1	1
	534705	0.05	0.00700903	4.07e-05	1	1	1	1
	534707	0.05	1	1	1	1	0.00633417	0.000611504
	534714	0.05	1	1	1	1	0.00442487	0.000190117
	534770	0.05	24.9838	1.67e-08	6.35531	1.84e-05	1	1
	534787	0.05	1	1	0.44601	0.00076238	1	1
	534801	0.05	0.11291	0.000226854	1	1	1	1
	534872	0.05	1	1	0.00773131	0.000199396	1	1
	534927	0.05	0.00863522	0.000139409	1	1	1	1
	534935	0.05	1	1	1	1	0.00317886	0.000155007
	534935	0.05	0.232479	0.000856732	1	1	1	1
	535030	0.05	238.686	0.000220685	1	1	1	1
	535056	0.05	2.99331	0.000679255	1	1	1	1
	535119	0.05	47.7142	0.000107448	1	1	1	1
	535171	0.05	5.01559	4.98e-05	3.10157	0.000818228	1	1
	535254	0.05	1	1	1	1	0.00730978	0.000825898
	535325	0.05	1	1	9.81488	0.00092703	1	1
	535327	0.05	6.12686	0.000164281	1	1	1	1
	535327	0.05	6.12686	0.000164281	1	1	1	1
	535328	0.05	5.54026	6.12e-06	1	1	1	1
	535347	0.05	0.240062	0.000962985	1	1	1	1
	535379	0.05	0.00417621	0.000349431	1	1	1	1
	535379	0.05	0.219304	0.000230649	1	1	1	1
	535496	0.05	0.00966526	0.000353474	1	1	1	1
	535498	0.05	1	1	1	1	253.48	2.12e-07
	535498	0.05	1	1	1	1	0.00255199	1.32e-12
	535683	0.05	1	1	1	1	19.339	0.000109564
	535858	0.05	9.45813	1.05e-06	1	1	1	1
	536011	0.05	0.00402099	1.32e-06	1	1	1	1
	536187	0.05	0.0102399	0.000508622	1	1	1	1
	536203	0.05	8.5726	1.94e-10	1	1	0.259236	0.000862
	536284	0.05	1	1	1	1	0.243115	3.98e-06
	536706	0.05	1	1	169.407	0.000385778	286.409	2.41e-05
	536747	0.05	4.49537	0.000650849	1	1	1	1
	536925	0.05	3.98716	1.64e-05	1	1	1	1
	536989	0.05	1	1	0.228505	0.000519884	1	1
	537028	0.05	7.79691	1.37e-08	1	1	0.21612	0.000221737
	537096	0.05	0.252149	5.9e-05	0.361238	0.000931991	1	1
	537221	0.05	1	1	3.23988	0.000107518	1	1
	537224	0.05	7.93517	3.14e-10	2.9128	7.27e-07	1	1
	537246	0.05	0.00480021	5.35e-06	1	1	1	1
	537304	0.05	0.243915	0.000654583	1	1	1	1
	537305	0.05	1	1	1	1	6.57874	0.000302037
	537314	0.05	4.98073	7.48e-06	1	1	1	1
	537341	0.05	1	1	1	1	0.00726468	0.000660155
	537506	0.05	19.0862	1.32e-05	1	1	1	1
	537595	0.05	0.00232804	1.48e-09	0.00285157	0.000411783	1	1
	537633	0.05	103.519	2.53e-08	1	1	0.0191627	5.71e-05
	537682	0.05	0.00238415	1.13e-12	1	1	1	1
	537777	0.05	12.3461	2.07e-06	1	1	1	1
	537799	0.05	0.157876	0.000350205	1	1	1	1
	537932	0.05	1	1	1	1	0.00665231	8.92e-19
	538029	0.05	0.00332593	1.28e-06	1	1	1	1
	538062	0.05	0.0813239	5.64e-09	1	1	1	1
	538062	0.05	1	1	1	1	0.00211276	0.000667988
	538209	0.05	1	1	0.209543	9.9e-05	1	1
	538276	0.05	0.186546	0.000619971	1	1	1	1
	538276	0.05	0.133597	1.43e-05	1	1	1	1
	538437	0.05	0.257341	0.000855247	1	1	1	1
	538447	0.05	0.279008	0.000652567	1	1	1	1
	538499	0.05	18.4543	5.09e-06	6.93953	0.000964748	1	1
	538515	0.05	12.6104	2.6e-05	1	1	1	1
	538515	0.05	0.00981721	0.000390425	1	1	1	1
	538517	0.05	0.255863	0.000685737	0.263982	0.000416459	1	1
	538532	0.05	0.174436	9.57e-07	0.148468	3.88e-08	1	1
	538532	0.05	1	1	1	1	195.515	8.12e-07
	538540	0.05	3.99547	3.91e-05	1	1	0.431782	1.76e-06
	538575	0.05	4.10714	2.93e-05	3.36412	2.4e-05	1	1
	538590	0.05	1	1	0.291652	7.12e-06	1	1
	538598	0.05	3.3642	0.000364709	1	1	1	1
	538604	0.05	1	1	1	1	0.00180072	5.05e-07
	538606	0.05	1	1	1	1	147.147	3.36e-05
	538640	0.05	1	1	1	1	114.816	0.000294401
	538640	0.05	9.98917	9.37e-08	1	1	1	1
	538685	0.05	0.161658	0.000113372	1	1	1	1
	538709	0.05	1	1	1	1	0.00525284	5.85e-07
	538751	0.05	0.0701147	0.000338026	1	1	1	1
	538774	0.05	1	1	0.0043513	2.23e-07	1	1
	538792	0.05	0.240862	0.000856767	1	1	1	1
	538794	0.05	1	1	1	1	0.0018637	2.47e-18
	538794	0.05	1	1	1	1	10.9107	1.18e-06
	538802	0.05	13.7766	3.25e-09	1	1	1	1
	538885	0.05	1	1	0.0672097	8.69e-13	1	1
	538885	0.05	1	1	595.874	9.18e-12	1	1
	538938	0.05	5.05275	1.33e-06	3.06946	4.69e-08	1	1
	538960	0.05	12.9356	1.75e-05	1	1	0.0815535	5.69e-06
	539076	0.05	1	1	1	1	155.15	0.000824075
	539190	0.05	1	1	1	1	0.00449577	0.000728615
	539190	0.05	6.94937	0.000136908	1	1	1	1
	539196	0.05	3.92587	8.78e-06	1	1	1	1
	539222	0.05	1	1	0.00548752	5.81e-06	1	1
	539275	0.05	1	1	0.00684318	6.81e-05	1	1
	539275	0.05	1	1	1	1	41.5534	3.29e-05
	539359	0.05	0.00647881	8.26e-06	1	1	1	1
	539376	0.05	1	1	1	1	4.67568	5.98e-05
	539378	0.05	0.172292	0.000274753	1	1	1	1
	539420	0.05	15.5494	8.72e-13	1	1	0.111045	0.000365537
	539420	0.05	11.7821	4.11e-11	1	1	0.215247	7.55e-09
	539421	0.05	0.0019081	0.000336589	1	1	1	1
	539452	0.05	0.0871594	7e-06	1	1	1	1
	539495	0.05	1	1	101.545	0.000358524	1	1
	539525	0.05	8.13407	1.31e-06	1	1	0.355739	0.000202228
	539528	0.05	0.0539385	5.07e-06	1	1	1	1
	539596	0.05	1	1	0.379225	0.000331304	1	1
	539603	0.05	1	1	0.347949	0.000207028	1	1
	539606	0.05	1	1	501.272	0.000195633	1	1
	539691	0.05	1	1	1	1	0.00560605	0.000421653
	539755	0.05	215.126	0.000100203	1	1	1	1
	539755	0.05	0.00287255	5.01e-11	1	1	1	1
	539761	0.05	0.00644509	8.04e-06	1	1	1	1
	539761	0.05	1	1	1	1	0.00650709	1.12e-05
	539780	0.05	0.11139	0.000118344	1	1	1	1
	539803	0.05	1	1	1	1	0.351068	8.9e-05
	539850	0.05	1	1	156.266	0.000254755	1	1
	539853	0.05	0.170155	4.75e-06	1	1	1	1
	539873	0.05	0.263848	7.41e-05	1	1	1	1
	539905	0.05	0.237696	0.000140926	1	1	1	1
	539997	0.05	0.218407	9.52e-06	1	1	1	1
	540004	0.05	0.00208462	4.84e-14	1	1	1	1
	540004	0.05	492.688	8.33e-05	1	1	1	1
	540068	0.05	49.0974	1.65e-27	5.20898	3.24e-19	0.10868	5.87e-06
	540068	0.05	171.415	7.58e-07	1	1	1	1
	540129	0.05	4.15322	0.000108794	1	1	1	1
	540135	0.05	0.245619	6.18e-05	1	1	1	1
	540138	0.05	3.11228	0.000523274	1	1	1	1
	540170	0.05	0.20382	0.000304736	1	1	1	1
	540234	0.05	4.17211	5.23e-05	1	1	0.474856	0.000286432
	540235	0.05	0.193716	0.000156272	1	1	1	1
	540235	0.05	8.02888	1.31e-08	1	1	1	1
	540239	0.05	6.69767	0.000753217	1	1	1	1
	540304	0.05	0.221887	0.000279436	1	1	1	1
	540325	0.05	6.79089	2.11e-08	2.50525	2.96e-05	0.378226	0.000117888
	540353	0.05	199.691	1.32e-09	1	1	0.00249686	6.87e-14
	540353	0.05	0.00505335	6.88e-05	1	1	289.35	3.25e-06
	540380	0.05	8.53187	1.48e-09	1	1	1	1
	540393	0.05	0.266062	0.000211892	1	1	1	1
	540404	0.05	1	1	1	1	8.10843	4.61e-05
	540413	0.05	11.5297	1.23e-10	2.69024	9.53e-05	0.239408	5.84e-05
	540423	0.05	0.055829	7.58e-06	1	1	1	1
	540431	0.05	3.23524	0.000582454	1	1	1	1
	540436	0.05	3.64746	4.86e-05	1	1	1	1
	540450	0.05	0.124667	5.44e-06	1	1	1	1
	540466	0.05	0.0180898	0.00012667	1	1	1	1
	540532	0.05	1	1	0.00495732	1.54e-06	0.12489	0.000502443
	540561	0.05	1	1	1	1	0.0524094	0.000280907
	540574	0.05	0.00291054	0.00073214	1	1	1	1
	540674	0.05	0.293111	0.000574144	1	1	1	1
	540676	0.05	0.039022	2.36e-11	1	1	1	1
	540682	0.05	3.72717	0.000729921	1	1	1	1
	540683	0.05	1	1	0.256358	0.000681646	1	1
	540692	0.05	0.00195656	0.000621327	1	1	1	1
	540701	0.05	82.4347	1.83e-07	1	1	1	1
	540716	0.05	3.18785	0.000796899	1	1	1	1
	540756	0.05	1	1	1	1	0.22616	1.59e-06
	540789	0.05	0.212164	1.4e-05	1	1	2.26301	0.000939706
	540815	0.05	0.00295195	9.09e-11	1	1	1	1
	540831	0.05	1	1	0.112382	3.11e-08	0.0846921	3.96e-14
	540831	0.05	1	1	331.435	0.000247424	344.907	0.000181564
	540836	0.05	0.168742	4.83e-05	1	1	1	1
	540869	0.05	8.6271	0.000443099	1	1	1	1
	540892	0.05	1	1	0.00442624	2.99e-07	1	1
	540892	0.05	0.00453316	7.96e-05	0.00532881	3.54e-06	1	1
	540901	0.05	0.202195	2.41e-05	0.266919	0.000311741	1	1
	540910	0.05	0.00588748	2.88e-05	1	1	1	1
	540926	0.05	1	1	1	1	0.00550169	0.00028243
	540926	0.05	0.00499594	3.73e-07	1	1	1	1
	540964	0.05	0.0108471	0.000792413	0.00756455	0.000150737	1	1
	540965	0.05	3.91276	2.53e-05	2.03327	0.000436805	1	1
	540990	0.05	0.339197	0.000384507	1	1	1	1
	541004	0.05	0.200036	0.000491913	1	1	1	1
	541106	0.05	6.28844	0.00057246	1	1	1	1
	541119	0.05	177.46	1.41e-08	1	1	0.00851203	0.0001467
	541151	0.05	0.0690814	0.00031453	1	1	1	1
	541156	0.05	0.227089	0.000269045	0.229125	0.000102623	1	1
	541204	0.05	1	1	0.00339562	4.63e-09	1	1
	541208	0.05	0.269497	0.000595027	1	1	1	1
	613357	0.05	3.21867	0.000269394	1	1	1	1
	613446	0.05	6.82536	1.26e-05	1	1	1	1
	613533	0.05	0.00194285	6.6e-11	1	1	1	1
	613554	0.05	4.89376	0.000387807	1	1	1	1
	613568	0.05	3.72835	0.000152124	3.12002	0.000343211	1	1
	613592	0.05	3.22875	0.000366344	2.24028	0.000157148	1	1
	613667	0.05	4.35641	0.000360797	1	1	1	1
	613753	0.05	3.02738	0.000852267	3.46807	0.00013676	1	1
	613773	0.05	0.00390308	1.11e-08	0.0044657	3.18e-07	1	1
	613794	0.05	1	1	0.00574538	0.000130989	0.00362279	4.38e-06
	613800	0.05	12.1195	0.000368639	1	1	0.155681	0.000780103
	613802	0.05	17.6708	6.44e-08	1	1	0.126704	0.000338867
	613811	0.05	1	1	0.471708	0.000152316	1	1
	613916	0.05	0.00633001	6.21e-06	1	1	1	1
	613932	0.05	1	1	1	1	0.00821599	0.000107437
	614105	0.05	3.4309	0.000693222	1	1	1	1
	614282	0.05	10.9934	7.42e-09	1	1	0.192601	0.000169627
	614323	0.05	1	1	1	1	0.0372585	1.62e-10
	614347	0.05	99.788	0.000470548	89.4229	0.00063543	1	1
	614380	0.05	16.8505	3.03e-13	4.78922	1.36e-08	1	1
	614406	0.05	1	1	1	1	11.0942	9.67e-05
	614406	0.05	13.0217	0.000372904	1	1	1	1
	614579	0.05	300.289	2.17e-08	1	1	0.00792219	8.53e-05
	614579	0.05	3.73134	0.000809544	1	1	1	1
	614673	0.05	3.26616	0.000313994	2.3946	9.47e-05	1	1
	614775	0.05	166.525	6.68e-17	5.42615	4.23e-05	1	1
	614835	0.05	40.9047	1.7e-09	1	1	1	1
	614838	0.05	0.193261	0.000433817	1	1	1	1
	614838	0.05	0.00236434	5.08e-05	1	1	1	1
	614838	0.05	0.219837	2.62e-06	1	1	1	1
	614878	0.05	0.0500259	4.27e-09	0.141966	0.000431238	1	1
	614921	0.05	0.29466	0.00081363	1	1	1	1
	614921	0.05	324.394	9.73e-05	1	1	0.0068129	0.000699522
	615091	0.05	80.6474	0.000232745	1	1	1	1
	615107	0.05	0.355815	0.000160214	1	1	1	1
	615199	0.05	116.541	5.61e-05	1	1	0.0127752	0.000480829
	615211	0.05	1	1	0.00679984	5.97e-05	0.114626	0.000453253
	615229	0.05	4.72463	3.79e-05	1	1	1	1
	615300	0.05	3.58664	0.000291178	1	1	1	1
	615368	0.05	5.57582	1.44e-06	2.59765	0.000530707	1	1
	615371	0.05	1	1	1	1	0.0012445	2.71e-05
	615388	0.05	1	1	148.165	0.000212181	1	1
	615490	0.05	0.23689	0.000440654	1	1	1	1
	615505	0.05	0.00447399	1.77e-07	1	1	1	1
	615552	0.05	4.49799	0.000128714	1	1	1	1
	615638	0.05	5.51779	0.000157693	1	1	1	1
	615659	0.05	1	1	1	1	0.0032275	0.000195986
	615681	0.05	1	1	0.00690164	7.08e-05	1	1
	615685	0.05	3.2714	0.000276244	2.28468	0.000295826	1	1
	615733	0.05	1	1	1	1	3.93741	0.000827906
	615785	0.05	9.6609	2.62e-12	2.19961	3.11e-06	0.233283	0.000187982
	615846	0.05	3.68328	0.000655977	1	1	1	1
	615883	0.05	0.280211	0.000399958	0.290659	6.79e-05	1	1
	616065	0.05	3.1066	0.000902653	1	1	1	1
	616156	0.05	4.05686	9.68e-05	1	1	1	1
	616246	0.05	0.184453	0.000667299	1	1	1	1
	616366	0.05	1	1	0.385805	0.000837125	1	1
	616503	0.05	4.29042	0.000123952	1	1	1	1
	616576	0.05	8.91686	1.71e-10	2.09719	0.000342105	0.241211	3.07e-08
	616718	0.05	8.9829	4e-09	2.39527	0.000566953	0.273473	0.000148368
	616742	0.05	8.14317	0.000212466	1	1	1	1
	616753	0.05	4.18702	0.000604753	4.19699	0.000377531	1	1
	616871	0.05	3.42111	0.000600824	1	1	1	1
	616885	0.05	0.165576	0.00063285	1	1	1	1
	616969	0.05	0.177843	0.000105772	0.202988	0.000555846	1	1
	617040	0.05	4.5172	0.000543471	1	1	1	1
	617083	0.05	1	1	1	1	0.00533182	0.000719302
	617138	0.05	16.7162	9.12e-05	1	1	1	1
	617269	0.05	1	1	1	1	0.00490145	0.000583361
	617336	0.05	0.118236	6.3e-06	1	1	1	1
	617437	0.05	16.3515	1.83e-09	4.19589	0.000103272	1	1
	617442	0.05	0.179417	2.41e-05	1	1	1	1
	617599	0.05	508.551	8.5e-18	6.44355	6.11e-06	0.0130453	0.000369298
	617720	0.05	9.32496	2.17e-05	1	1	1	1
	618020	0.05	5.86879	0.000679874	1	1	1	1
	618054	0.05	0.0902314	4.74e-06	1	1	4.56902	0.000930551
	618054	0.05	0.0374777	1.37e-08	0.0681263	0.000388766	1	1
	618104	0.05	0.00896274	0.000191621	1	1	1	1
	618104	0.05	73.3882	0.000332183	1	1	1	1
	618190	0.05	1	1	0.00350424	2.12e-07	0.00218974	3.28e-09
	618190	0.05	1	1	263.016	0.00024252	1	1
	618238	0.05	5.29744	3.95e-08	2.90068	1.27e-09	1	1
	618319	0.05	22.0254	7.53e-12	1	1	0.053115	4e-17
	618389	0.05	83.5078	5.5e-05	1	1	0.0229815	5.63e-05
	618399	0.05	1	1	1	1	0.00499968	0.000768203
	618400	0.05	1	1	1	1	0.245861	2.59e-06
	618412	0.05	9.51227	0.000116434	1	1	1	1
	618571	0.05	0.255825	0.00010334	0.349199	0.000989141	1	1
	618612	0.05	11.9643	0.000622975	1	1	1	1
	618702	0.05	3.52691	0.000137621	1	1	1	1
	618755	0.05	333.813	7.05e-07	1	1	1	1
	654488	0.05	0.199691	2.57e-05	1	1	1	1
	767617	0.05	2.91759	0.000229084	1	1	1	1
	767827	0.05	0.000422199	2.89e-35	0.000833008	2.49e-13	1	1
	767841	0.05	0.010174	0.000492773	1	1	1	1
	767882	0.05	2.84799	0.000645683	1	1	1	1
	767903	0.05	3.22696	0.000785803	1	1	1	1
	767908	0.05	4.02551	4.22e-05	1	1	1	1
	767925	0.05	3.72528	4.58e-05	1	1	1	1
	767977	0.05	6.45606	2.77e-06	1	1	0.428123	0.000133781
	767984	0.05	4.05453	7.64e-05	1	1	0.439183	0.000545842
	768021	0.05	9.28601	0.000383036	1	1	1	1
	768037	0.05	1	1	0.00814034	0.000304316	1	1
	768068	0.05	117.707	5.38e-06	1	1	1	1
	768068	0.05	0.00825887	9.88e-05	1	1	1	1
	768317	0.05	3.31915	0.000205787	1	1	1	1
	768327	0.05	3.5143	0.000178243	1	1	1	1
	768330	0.05	3.59485	0.000733761	1	1	1	1
	780855	0.05	0.00833787	0.000107689	1	1	1	1
	780856	0.05	1	1	1	1	382.884	0.00014813
	780866	0.05	20.6865	4.51e-17	3.17943	4.35e-07	0.157397	0.000235316
	781044	0.05	7.16318	4.26e-09	2.62141	6.72e-06	0.375966	5.59e-05
	781063	0.05	0.248507	0.000227695	1	1	1	1
	781119	0.05	41.5902	4.11e-08	7.62875	0.000203912	1	1
	781188	0.05	111.556	0.00039426	99.7995	0.000498023	1	1
	781188	0.05	1	1	1	1	0.0307334	2.33e-05
	781493	0.05	0.273809	0.000228175	0.258492	0.00024043	1	1
	781653	0.05	1	1	0.191195	2.48e-05	1	1
	781683	0.05	1	1	0.23587	0.000167626	1	1
	781710	0.05	0.253569	0.000728754	1	1	1	1
	781806	0.05	3.68241	0.000536733	1	1	1	1
	781953	0.05	1	1	0.211387	9.55e-05	1	1
	781953	0.05	0.0065605	1.02e-05	1	1	1	1
	782045	0.05	144.756	0.000235268	129.52	0.000299063	1	1
	782247	0.05	0.0030869	2.18e-10	0.00906743	0.000723232	1	1
	782450	0.05	0.0109451	8.53e-08	0.0111245	1.86e-06	1	1
	782535	0.05	0.152251	3.7e-05	1	1	1	1
	782545	0.05	1	1	1	1	0.0525348	5.91e-05
	782605	0.05	5.06917	1.34e-06	1	1	1	1
	782651	0.05	0.00913777	0.000231799	1	1	1	1
	782652	0.05	8.9205	0.000197628	1	1	1	1
	782788	0.05	18.1601	0.00048509	1	1	1	1
	783000	0.05	0.214331	0.000530437	1	1	1	1
	783000	0.05	750.34	7.25e-15	1	1	1	1
	783020	0.05	5.52707	0.000357037	1	1	0.391993	0.000101644
	783235	0.05	3.54433	0.000471272	1	1	1	1
	783416	0.05	1	1	0.00671093	5.26e-05	1	1
	783720	0.05	1	1	1	1	0.00458116	0.000499074
	784007	0.05	1	1	119.623	8.58e-05	1	1
	784007	0.05	0.0278135	0.000131054	0.0260981	9.74e-07	1	1
	784181	0.05	0.00850068	0.000260613	1	1	1	1
	784906	0.05	13.6511	1.81e-08	7.57392	1.56e-06	1	1
	785125	0.05	1	1	1	1	0.00725687	0.000535432
	785418	0.05	4.37912	0.000910522	1	1	1	1
	785475	0.05	0.223301	2.86e-05	0.287431	0.000226365	1	1
	785664	0.05	11.3128	9.14e-05	1	1	0.17661	0.000912025
	785666	0.05	0.0697879	2.67e-10	0.16154	0.000481459	1	1
	785666	0.05	4.2171	0.000409038	1	1	1	1
	785942	0.05	0.186956	0.000320343	1	1	1	1
	785942	0.05	0.225055	0.000342796	1	1	1	1
	786072	0.05	255.625	1.57e-11	1	1	1	1
	786072	0.05	23.9097	2.4e-08	1	1	0.0973189	1e-06
	786098	0.05	3.11545	0.000812602	1	1	1	1
	786607	0.05	45.5467	1.02e-23	3.93353	5.9e-11	1	1
	786607	0.05	33.5217	0.000492182	1	1	1	1
	786844	0.05	3.10282	0.000923606	1	1	1	1
	786844	0.05	1	1	0.164008	1.43e-05	1	1
	786844	0.05	0.161174	0.000102271	0.0874442	1.73e-06	1	1
	786987	0.05	0.00624439	1.6e-07	1	1	167.369	3.08e-10
	786987	0.05	0.00994193	0.000443998	1	1	1	1
	787482	0.05	200.445	0.0002978	179.996	0.00037394	1	1
	788113	0.05	1	1	0.228713	0.000221148	1	1
	788113	0.05	1	1	513.3	6.99e-05	1038.95	2.09e-05
	788224	0.05	3.85882	0.000385571	1	1	1	1
	788288	0.05	1	1	1	1	123.081	0.00088224
	788507	0.05	0.00643979	8.08e-06	1	1	1	1
	788717	0.05	8.43726	3.56e-05	1	1	1	1
	788772	0.05	297.737	2.07e-05	26.5752	0.000763053	1	1
	788861	0.05	3.91162	4.39e-05	1	1	1	1
	788978	0.05	0.00959363	0.000331743	1	1	1	1
	789209	0.05	17.1023	1.47e-05	1	1	0.113009	0.0004868
	789390	0.05	12.5404	4.14e-05	1	1	1	1
	789485	0.05	0.21587	4.19e-05	0.213082	4.66e-06	1	1
	789539	0.05	3.85465	1.57e-05	1	1	0.495647	3.91e-05
	100124429	0.05	0.00788686	5.95e-05	1	1	1	1
	100124430	0.05	0.00466995	1.58e-07	1	1	1	1
	100124505	0.05	0.0727707	4.63e-06	1	1	1	1
	100125221	0.05	0.00508042	1.23e-05	1	1	1	1
	100125224	0.05	0.116144	0.000101984	1	1	1	1
	100125224	0.05	1	1	217.524	0.000242737	1	1
	100125264	0.05	0.220683	0.000180831	1	1	1	1
	100125267	0.05	0.269961	0.000143908	1	1	1	1
	100125303	0.05	7.49029	0.000303071	1	1	1	1
	100125317	0.05	3.63659	0.000761928	3.1973	0.000909717	1	1
	100125414	0.05	0.00333647	7.76e-10	1	1	1	1
	100125834	0.05	3.03116	0.000200595	2.35269	8.47e-07	1	1
	100138311	0.05	0.194509	0.000146625	1	1	1	1
	100138434	0.05	0.118727	2.5e-07	1	1	1	1
	100140107	0.05	0.00948074	0.000318348	1	1	1	1
	100141038	0.05	0.0035315	4.1e-09	0.00523997	1.94e-05	1	1
	100190887	0.05	0.0104984	0.00064859	1	1	1	1
	100295817	0.05	0.322987	0.000964397	1	1	1	1
	100296926	0.05	1	1	1	1	0.0393093	0.000295398
	100297762	0.05	1	1	0.00545325	4.87e-06	0.193111	0.000703582
	100298968	0.05	0.00684766	1.52e-05	1	1	1	1
	100300021	0.05	0.279783	0.000652099	1	1	1	1
	100300400	0.05	1	1	106.66	0.000995856	1	1
	100300494	0.05	15.8983	1.87e-11	2.61763	0.000636015	0.168782	4.48e-05
	100300634	0.05	4.42931	0.000319446	1	1	1	1
	100301323	0.05	17.943	4.24e-06	1	1	0.234754	0.000752689
	100336584	0.05	38.799	2.8e-11	1	1	0.0794013	4.11e-08
	100337021	0.05	0.150725	6.17e-05	1	1	1	1
	100337053	0.05	0.0103308	0.000581467	1	1	1	1
	100337259	0.05	1	1	1	1	0.00603187	4.53e-06
	100337282	0.05	186.579	0.000322038	167.387	0.000386892	1	1
	100337321	0.05	3.35346	0.000610828	1	1	1	1
	100337421	0.05	151.287	2.52e-07	1	1	1	1
	100848149	0.05	679.925	0.000496981	1	1	1	1
	100848149	0.05	18.5956	9.29e-07	1	1	1	1
	100848324	0.05	13.0625	4.27e-06	1	1	1	1
	100848337	0.05	8.70719	5.67e-06	1	1	1	1
	100848491	0.05	1	1	0.269656	1.61e-09	0.425874	1.57e-08
	100848970	0.05	2.8829	0.000587007	2.21229	7.59e-05	1	1
	100849046	0.05	0.185164	0.000440543	1	1	1	1
	101903126	0.05	0.137401	2.84e-09	1	1	1	1
	101903126	0.05	0.271854	2.23e-05	1	1	1	1
	101903126	0.05	0.151035	2.15e-08	1	1	1	1
	101906102	0.05	3.68675	4.89e-05	1	1	1	1
	104968644	0.05	0.00628701	0.000188041	1	1	1	1
	104970468	0.05	11.1552	5.09e-06	1	1	1	1
	107131748	0.05	33.5931	2.04e-09	1	1	0.0721094	4.82e-06
	107131748	0.05	20.1415	9.13e-05	1	1	0.0740063	1.38e-45
	107131748	0.05	681.661	8.44e-05	1	1	0.0012849	0.000175632
	107131748	0.05	45.647	6.69e-27	2.89908	1.26e-06	0.0651232	1.18e-05
	107131748	0.05	67.2096	2.24e-10	1	1	0.0419792	0.000113322

## Sheet: Sheet(C)
			Min % genes in pathway (array vs. genome)	30	Flux	=	-100		-50		0		50		100			Impact		=	0		25		50		100		200
			PATHWAY		Comp1		Comp2		Comp3		#REF!		#REF!		#REF!		#REF!		#REF!		#REF!		#REF!		#REF!		#REF!		#REF!		#REF!		#REF!		#REF!		#REF!		#REF!		#REF!		#REF!
Path ID	CATEGORY	SUB-CATEGORY	n= 10 most impacted terms; n= 10% most impacted terms		Foldchange(310 day vs non-lacting)		Foldchange (100 day vs 310day)		Foldchange (100day vs non-lactating)		#REF!		#REF!		#REF!		#REF!		#REF!		#REF!		#REF!		#REF!		#REF!		#REF!		#REF!		#REF!		#REF!		#REF!		#REF!		#REF!		#REF!
bta00010	1. Metabolism	1.1 Carbohydrate Metabolism	Glycolysis / Gluconeogenesis	165.197	46.0405	-46.0405	95.2074	95.2074	23.9487	23.9487																																			24.3719	1
bta00020	1. Metabolism	1.1 Carbohydrate Metabolism	Citrate cycle (TCA cycle)	98.4344	31.9618	-31.9618	41.7536	41.7536	24.7189	24.7189																																			11.5036	1
bta00030	1. Metabolism	1.1 Carbohydrate Metabolism	Pentose phosphate pathway	47.7104			29.7173	29.7173	17.993	17.993																																			23.8552	1
bta00040	1. Metabolism	1.1 Carbohydrate Metabolism	Pentose and glucuronate interconversions	62.4799	62.4799	-62.4799																																							-62.4799	1
bta00051	1. Metabolism	1.1 Carbohydrate Metabolism	Fructose and mannose metabolism	44.4807			29.8614	29.8614	14.6193	14.6193																																			22.2404	1
bta00052	1. Metabolism	1.1 Carbohydrate Metabolism	Galactose metabolism	1245.2	219.088	-219.088	836.048	836.048	190.068	-103.713																																			171.082	1
bta00053	1. Metabolism	1.1 Carbohydrate Metabolism	Ascorbate and aldarate metabolism	0
bta00061	1. Metabolism	1.3 Lipid Metabolism	Fatty acid biosynthesis	512.782			512.782	512.782																																					512.782	1
bta00062	1. Metabolism	1.3 Lipid Metabolism	Fatty acid elongation in mitochondria	0
bta00071	1. Metabolism	1.3 Lipid Metabolism	Fatty acid metabolism	57.6059			47.8838	-47.8838	9.72207	9.72207																																			-19.0809	1
bta00072	1. Metabolism	1.3 Lipid Metabolism	Synthesis and degradation of ketone bodies	402.018			357.729	357.729	44.2894	44.2894																																			201.009	1
bta00100	1. Metabolism	1.3 Lipid Metabolism	Steroid biosynthesis	305.61	36.1742	-36.1742	269.435	188.79																																					76.308	1
bta00120	1. Metabolism	1.3 Lipid Metabolism	Primary bile acid biosynthesis	0
bta00130	1. Metabolism	1.8 Metabolism of Cofactors and Vitamins	Ubiquinone and other terpenoid-quinone biosynthesis	0
bta00140	1. Metabolism	1.3 Lipid Metabolism	Steroid hormone biosynthesis	17.3637			17.3637	17.3637																																					17.3637	1
bta00190	1. Metabolism	1.2 Energy Metabolism	Oxidative phosphorylation	11.5578			11.5578	11.5578																																					11.5578	1
bta00230	1. Metabolism	1.4 Nucleotide Metabolism	Purine metabolism	209.36	20.5291	-20.5291	155.166	-108.21	33.6645	-33.6645																																			-54.1345	1
bta00232	1. Metabolism	1.10 Biosynthesis of Other Secondary Metabolites	Caffeine metabolism	1373.02	640.506	-640.506	732.516	732.516																																					46.0049	1
bta00240	1. Metabolism	1.4 Nucleotide Metabolism	Pyrimidine metabolism	74.8561			70.4591	-59.519	4.39708	4.39708																																			-27.5609	1
bta00250	1. Metabolism	1.5 Amino Acid Metabolism	Alanine, aspartate and glutamate metabolism	114.621	37.6932	-37.6932	76.9273	76.9273																																					19.617	1
bta00260	1. Metabolism	1.5 Amino Acid Metabolism	Glycine, serine and threonine metabolism	106.283	22.7519	-22.7519	71.1279	71.1279	12.4029	-12.4029																																			11.991	1
bta00270	1. Metabolism	1.5 Amino Acid Metabolism	Cysteine and methionine metabolism	178.489	57.9967	-57.9967	67.7991	67.7991	52.693	52.693																																			20.8318	1
bta00280	1. Metabolism	1.5 Amino Acid Metabolism	Valine, leucine and isoleucine degradation	527.806	13.0598	13.0598	283.216	245.15	231.53	231.53																																			163.247	1
bta00290	1. Metabolism	1.5 Amino Acid Metabolism	Valine, leucine and isoleucine biosynthesis	0
bta00300	1. Metabolism	1.5 Amino Acid Metabolism	Lysine biosynthesis	0
bta00310	1. Metabolism	1.5 Amino Acid Metabolism	Lysine degradation	30.905			22.0471	22.0471	8.85789	8.85789																																			15.4525	1
bta00330	1. Metabolism	1.5 Amino Acid Metabolism	Arginine and proline metabolism	82.2997			18.331	18.331	63.9687	63.9687																																			41.1498	1
bta00340	1. Metabolism	1.5 Amino Acid Metabolism	Histidine metabolism	0
bta00350	1. Metabolism	1.5 Amino Acid Metabolism	Tyrosine metabolism	56.6903	17.5492	17.5492	25.5754	-25.5754	13.5657	-13.5657																																			-7.19731	1
bta00360	1. Metabolism	1.5 Amino Acid Metabolism	Phenylalanine metabolism	27.1314					27.1314	-27.1314																																			-27.1314	1
bta00380	1. Metabolism	1.5 Amino Acid Metabolism	Tryptophan metabolism	42.3474	13.3708	13.3708	19.486	-19.486	9.49059	9.49059																																			1.12512	1
bta00400	1. Metabolism	1.5 Amino Acid Metabolism	Phenylalanine, tyrosine and tryptophan biosynthesis	0
bta00410	1. Metabolism	1.6 Metabolism of Other Amino Acids	beta-Alanine metabolism	17.3641					17.3641	-17.3641																																			-17.3641	1
bta00430	1. Metabolism	1.6 Metabolism of Other Amino Acids	Taurine and hypotaurine metabolism	497.03			279.671	279.671	217.359	217.359																																			248.515	1
bta00450	1. Metabolism	1.6 Metabolism of Other Amino Acids	Selenoamino acid metabolism	0
bta00460	1. Metabolism	1.6 Metabolism of Other Amino Acids	Cyanoamino acid metabolism	0
bta00471	1. Metabolism	1.6 Metabolism of Other Amino Acids	D-Glutamine and D-glutamate metabolism	0
bta00472	1. Metabolism	1.6 Metabolism of Other Amino Acids	D-Arginine and D-ornithine metabolism	0
bta00480	1. Metabolism	1.6 Metabolism of Other Amino Acids	Glutathione metabolism	77.5759	8.08005	-8.08005	69.4958	45.9016																																					18.9108	1
bta00500	1. Metabolism	1.1 Carbohydrate Metabolism	Starch and sucrose metabolism	366.25	165.315	-13.3281	90.6762	90.6762	110.259	-88.4757																																			-3.70923	1
bta00510	1. Metabolism	1.7 Glycan Biosynthesis and Metabolism	N-Glycan biosynthesis	299.12			232.563	-126.65	66.5574	-66.5574																																			-96.6039	1
bta00511	1. Metabolism	1.7 Glycan Biosynthesis and Metabolism	Other glycan degradation	77.4991			48.9938	-48.9938	28.5052	-28.5052																																			-38.7495	1
bta00512	1. Metabolism	1.7 Glycan Biosynthesis and Metabolism	O-Glycan biosynthesis	593.516			325.625	-325.625	267.891	-267.891																																			-296.758	1
bta00514	1. Metabolism	1.7 Glycan Biosynthesis and Metabolism	O-Mannosyl glycan biosynthesis	47.4996			47.4996	47.4996																																					47.4996	1
bta00520	1. Metabolism	1.1 Carbohydrate Metabolism	Amino sugar and nucleotide sugar metabolism	324.388	111.978	-111.978	170.767	90.8932	41.6428	21.3724																																			0.0957379	1
bta00524	1. Metabolism	1.10 Biosynthesis of Other Secondary Metabolites	Butirosin and neomycin biosynthesis	1664.89	513.788	-513.788	1027.66	1027.66	123.437	123.437																																			212.437	1
bta00531	1. Metabolism	1.7 Glycan Biosynthesis and Metabolism	Glycosaminoglycan degradation	65.2624			41.258	-41.258	24.0044	-24.0044																																			-32.6312	1
bta00532	1. Metabolism	1.7 Glycan Biosynthesis and Metabolism	Glycosaminoglycan biosynthesis - chondroitin sulfate	0
bta00533	1. Metabolism	1.7 Glycan Biosynthesis and Metabolism	Glycosaminoglycan biosynthesis - keratan sulfate	1242.46			724.542	-534.543	517.922	-517.922																																			-526.233	1
bta00534	1. Metabolism	1.7 Glycan Biosynthesis and Metabolism	Glycosaminoglycan biosynthesis - heparan sulfate	0
bta00561	1. Metabolism	1.3 Lipid Metabolism	Glycerolipid metabolism	322.245	135.479	-135.479	172.741	172.741	14.0244	14.0244																																			17.0956	1
bta00562	1. Metabolism	1.1 Carbohydrate Metabolism	Inositol phosphate metabolism	61.3071			61.3071	-61.3071																																					-61.3071	1
bta00563	1. Metabolism	1.7 Glycan Biosynthesis and Metabolism	Glycosylphosphatidylinositol(GPI)-anchor biosynthesis	0
bta00564	1. Metabolism	1.3 Lipid Metabolism	Glycerophospholipid metabolism	190.432	70.5869	-70.5869	112.149	96.0925	7.6964	7.6964																																			11.0674	1
bta00565	1. Metabolism	1.3 Lipid Metabolism	Ether lipid metabolism	87.8515			69.5725	69.5725	18.2789	18.2789																																			43.9257	1
bta00590	1. Metabolism	1.3 Lipid Metabolism	Arachidonic acid metabolism	0
bta00591	1. Metabolism	1.3 Lipid Metabolism	Linoleic acid metabolism	0
bta00592	1. Metabolism	1.3 Lipid Metabolism	alpha-Linolenic acid metabolism	0
bta00600	1. Metabolism	1.3 Lipid Metabolism	Sphingolipid metabolism	0
bta00601	1. Metabolism	1.7 Glycan Biosynthesis and Metabolism	Glycosphingolipid biosynthesis - lacto and neolacto series	52.7773			52.7773	52.7773																																					52.7773	1
bta00603	1. Metabolism	1.7 Glycan Biosynthesis and Metabolism	Glycosphingolipid biosynthesis - globo series	998.389			564.627	-564.627	433.761	-433.761																																			-499.194	1
bta00604	1. Metabolism	1.7 Glycan Biosynthesis and Metabolism	Glycosphingolipid biosynthesis - ganglio series	998.389			564.627	-564.627	433.761	-433.761																																			-499.194	1
bta00620	1. Metabolism	1.1 Carbohydrate Metabolism	Pyruvate metabolism	145.922	28.982	-28.982	93.6855	93.6855	23.255	23.255																																			29.3195	1
bta00630	1. Metabolism	1.1 Carbohydrate Metabolism	Glyoxylate and dicarboxylate metabolism	1507.07			858.133	858.133	648.941	648.941																																			753.537	1
bta00640	1. Metabolism	1.1 Carbohydrate Metabolism	Propanoate metabolism	742.693	16.6224	-16.6224	430.072	430.072	295.998	295.998																																			236.483	1
bta00650	1. Metabolism	1.1 Carbohydrate Metabolism	Butanoate metabolism	139.16			123.829	123.829	15.331	15.331																																			69.5801	1
bta00670	1. Metabolism	1.8 Metabolism of Cofactors and Vitamins	One carbon pool by folate	158.358	158.358	158.358																																							158.358	1
bta00730	1. Metabolism	1.8 Metabolism of Cofactors and Vitamins	Thiamine metabolism	0
bta00740	1. Metabolism	1.8 Metabolism of Cofactors and Vitamins	Riboflavin metabolism	0
bta00750	1. Metabolism	1.8 Metabolism of Cofactors and Vitamins	Vitamin B6 metabolism	310.9	193.984	-33.5347	116.916	-116.916																																					-75.2254	1
bta00760	1. Metabolism	1.8 Metabolism of Cofactors and Vitamins	Nicotinate and nicotinamide metabolism	225.002	132.178	132.178	92.8234	27.3503																																					79.7644	1
bta00770	1. Metabolism	1.8 Metabolism of Cofactors and Vitamins	Pantothenate and CoA biosynthesis	61.8746			61.8746	61.8746																																					61.8746	1
bta00780	1. Metabolism	1.8 Metabolism of Cofactors and Vitamins	Biotin metabolism	0
bta00785	1. Metabolism	1.8 Metabolism of Cofactors and Vitamins	Lipoic acid metabolism	0
bta00790	1. Metabolism	1.8 Metabolism of Cofactors and Vitamins	Folate biosynthesis	232.539	56.0085	-56.0085	176.531	176.531																																					60.2611	1
bta00830	1. Metabolism	1.8 Metabolism of Cofactors and Vitamins	Retinol metabolism	38.0955	24.0195	-24.0195	14.076	14.076																																					-4.97175	1
bta00860	1. Metabolism	1.8 Metabolism of Cofactors and Vitamins	Porphyrin and chlorophyll metabolism	0
bta00900	1. Metabolism	1.9 Metabolism of Terpenoids and Polyketides	Terpenoid backbone biosynthesis	28.4718					28.4718	28.4718																																			28.4718	1
bta00910	1. Metabolism	1.2 Energy Metabolism	Nitrogen metabolism	147.165			147.165	147.165																																					147.165	1
bta00920	1. Metabolism	1.2 Energy Metabolism	Sulfur metabolism	0
bta00970	2. Genetic Information Processing	2.2 Translation	Aminoacyl-tRNA biosynthesis	0
bta00980	1. Metabolism	1.11 Xenobiotics Biodegradation and Metabolism	Metabolism of xenobiotics by cytochrome P450	19.6263			19.6263	19.6263																																					19.6263	1
bta00982	1. Metabolism	1.11 Xenobiotics Biodegradation and Metabolism	Drug metabolism - cytochrome P450	44.4784	11.2315	11.2315	33.2469	0.510368																																					5.87092	1
bta00983	1. Metabolism	1.11 Xenobiotics Biodegradation and Metabolism	Drug metabolism - other enzymes	196.146	91.5009	-91.5009	104.645	104.645																																					6.57213	1
bta01040	1. Metabolism	1.3 Lipid Metabolism	Biosynthesis of unsaturated fatty acids	181.672	80.1925	-80.1925	101.479	101.479																																					10.6435	1
bta01100	1. Metabolism	0.1 Metabolic pathways	Metabolic pathways	134.883	28.1214	-10.5531	77.5714	40.871	29.1901	4.73958																																			11.6858	1
bta02010	3. Environmental Information Processing	3.1 Membrane Transport	ABC transporters	182.614	16.5794	-16.5794	145.988	101.758	20.0464	20.0464																																			35.0749	1
bta03008	2. Genetic Information Processing	2.2 Translation	Ribosome biogenesis in eukaryotes	0
bta03010	2. Genetic Information Processing	2.2 Translation	Ribosome	459.655	46.9729	-46.9729	398.782	398.782	13.9003	13.9003																																			121.903	1
bta03013	2. Genetic Information Processing	2.2 Translation	RNA transport	12.7961			12.7961	0.708758																																					0.708758	1
bta03015	2. Genetic Information Processing	2.2 Translation	mRNA surveillance pathway	111.71	13.7316	13.7316	84.389	84.389	13.5892	13.5892																																			37.2366	1
bta03018	2. Genetic Information Processing	2.3 Folding, Sorting and Degradation	RNA degradation	139.044	39.611	39.611			99.4328	-99.4328																																			-29.9109	1
bta03020	2. Genetic Information Processing	2.1 Transcription	RNA polymerase	0
bta03022	2. Genetic Information Processing	2.1 Transcription	Basal transcription factors	322.45			248.114	-248.114	74.336	-74.336																																			-161.225	1
bta03030	2. Genetic Information Processing	2.4 Replication and Repair	DNA replication	0
bta03040	2. Genetic Information Processing	2.1 Transcription	Spliceosome	30.6449	30.6449	30.6449																																							30.6449	1
bta03050	2. Genetic Information Processing	2.3 Folding, Sorting and Degradation	Proteasome	39.3587	39.3587	39.3587																																							39.3587	1
bta03060	2. Genetic Information Processing	2.3 Folding, Sorting and Degradation	Protein export	252.931			160.881	160.881	92.0497	92.0497																																			126.465	1
bta03320	5. Organismal Systems	5.2 Endocrine System	PPAR signaling pathway	418.737	106.986	-106.986	301.851	244.109	9.8996	9.8996																																			49.0076	1
bta03410	2. Genetic Information Processing	2.4 Replication and Repair	Base excision repair	289.655	173.133	173.133	116.522	-116.522																																					28.3055	1
bta03420	2. Genetic Information Processing	2.4 Replication and Repair	Nucleotide excision repair	0
bta03430	2. Genetic Information Processing	2.4 Replication and Repair	Mismatch repair	0
bta03440	2. Genetic Information Processing	2.4 Replication and Repair	Homologous recombination	0
bta03450	2. Genetic Information Processing	2.4 Replication and Repair	Non-homologous end-joining	0
bta04010	3. Environmental Information Processing	3.2 Signal Transduction	MAPK signaling pathway	161.695	26.1953	26.1953	112.893	-72.4693	22.6068	-22.6068																																			-22.9603	1
bta04012	3. Environmental Information Processing	3.2 Signal Transduction	ErbB signaling pathway	133.179			126.424	-52.6288	6.75523	-6.75523																																			-29.692	1
bta04020	3. Environmental Information Processing	3.2 Signal Transduction	Calcium signaling pathway	174.46	5.1162	-5.1162	139.082	-66.662	30.2624	7.22885																																			-21.5164	1
bta04060	3. Environmental Information Processing	3.3 Signaling Molecules and Interaction	Cytokine-cytokine receptor interaction	171.09	41.1884	27.5568	102.35	-67.4786	27.5515	-27.5515																																			-22.4911	1
bta04062	5. Organismal Systems	5.1 Immune System	Chemokine signaling pathway	164.002	5.09421	5.09421	152.846	-63.7179	6.0617	1.25003																																			-19.1246	1
bta04070	3. Environmental Information Processing	3.2 Signal Transduction	Phosphatidylinositol signaling system	77.4882			77.4882	-77.4882																																					-77.4882	1
bta04080	3. Environmental Information Processing	3.3 Signaling Molecules and Interaction	Neuroactive ligand-receptor interaction	53.5241			41.0526	31.8946	12.4716	12.4716																																			22.1831	1
bta04110	4. Cellular Processes	4.3 Cell Growth and Death	Cell cycle	43.5922			25.7264	12.3711	17.8658	17.8658																																			15.1185	1
bta04114	4. Cellular Processes	4.3 Cell Growth and Death	Oocyte meiosis	185.244			144.291	-102.6	40.9528	-1.85023																																			-52.2249	1
bta04115	4. Cellular Processes	4.3 Cell Growth and Death	p53 signaling pathway	12.9101			12.9101	12.9101																																					12.9101	1
bta04120	2. Genetic Information Processing	2.3 Folding, Sorting and Degradation	Ubiquitin mediated proteolysis	343.649	51.6037	51.6037	224.149	-88.2244	67.8964	-21.811																																			-19.4772	1
bta04122	2. Genetic Information Processing	2.3 Folding, Sorting and Degradation	Sulfur relay system	274.819	66.1919	-66.1919	208.627	208.627																																					71.2176	1
bta04130	2. Genetic Information Processing	2.3 Folding, Sorting and Degradation	SNARE interactions in vesicular transport	371.537			341.047	341.047	30.4898	30.4898																																			185.769	1
bta04140	4. Cellular Processes	4.1 Transport and Catabolism	Regulation of autophagy	73.3623	52.3725	52.3725	20.9899	20.9899																																					36.6812	1
bta04141	2. Genetic Information Processing	2.3 Folding, Sorting and Degradation	Protein processing in endoplasmic reticulum	54.7429			43.6496	43.6496	11.0932	11.0932																																			27.3714	1
bta04142	4. Cellular Processes	4.1 Transport and Catabolism	Lysosome	112.119			83.287	-83.287	28.8324	-28.8324																																			-56.0597	1
bta04144	4. Cellular Processes	4.1 Transport and Catabolism	Endocytosis	180.624			120.785	14.767	59.8389	-7.95038																																			3.4083	1
bta04145	4. Cellular Processes	4.1 Transport and Catabolism	Phagosome	288.84	14.1293	-14.1293	226.647	19.2973	48.0636	-32.9268																																			-9.25293	1
bta04146	4. Cellular Processes	4.1 Transport and Catabolism	Peroxisome	190.298	40.0693	-40.0693	150.229	54.9916																																					7.46116	1
bta04150	3. Environmental Information Processing	3.2 Signal Transduction	mTOR signaling pathway	39.9406	27.2773	-27.2773	12.6633	-12.6633																																					-19.9703	1
bta04210	4. Cellular Processes	4.3 Cell Growth and Death	Apoptosis	152.657	96.5008	65.1984	56.1558	-38.0458																																					13.5763	1
bta04260	5. Organismal Systems	5.3 Circulatory System	Cardiac muscle contraction	39.1656			33.0989	8.72843	6.06673	6.06673																																			7.39758	1
bta04270	5. Organismal Systems	5.3 Circulatory System	Vascular smooth muscle contraction	142.628	30.9763	30.9763	105.17	-70.9917	6.48164	6.48164																																			-11.1779	1
bta04310	3. Environmental Information Processing	3.2 Signal Transduction	Wnt signaling pathway	208.189			162.257	-68.6055	45.9324	-29.2104																																			-48.908	1
bta04320	5. Organismal Systems	5.8 Development	Dorso-ventral axis formation	0
bta04330	3. Environmental Information Processing	3.2 Signal Transduction	Notch signaling pathway	0
bta04340	3. Environmental Information Processing	3.2 Signal Transduction	Hedgehog signaling pathway	164.139			115.872	115.872	48.2672	48.2672																																			82.0696	1
bta04350	3. Environmental Information Processing	3.2 Signal Transduction	TGF-beta signaling pathway	44.076			44.076	44.076																																					44.076	1
bta04360	5. Organismal Systems	5.8 Development	Axon guidance	162.652	11.1032	-11.1032	101.357	-45.7883	50.1919	-50.1919																																			-35.6945	1
bta04370	3. Environmental Information Processing	3.2 Signal Transduction	VEGF signaling pathway	35.6582			35.6582	-6.54997																																					-6.54997	1
bta04380	5. Organismal Systems	5.8 Development	Osteoclast differentiation	227.364	57.9541	57.9541	164.807	-51.4302	4.60312	-4.60312																																			0.640271	1
bta04510	4. Cellular Processes	4.4 Cell Communication	Focal adhesion	154.181	33.3159	-33.3159	73.9178	-73.9178	46.9472	-46.9472																																			-51.3936	1
bta04512	3. Environmental Information Processing	3.3 Signaling Molecules and Interaction	ECM-receptor interaction	267.609	54.4242	-54.4242	122.878	11.3967	90.3071	-73.6055																																			-38.8777	1
bta04514	3. Environmental Information Processing	3.3 Signaling Molecules and Interaction	Cell adhesion molecules (CAMs)	385.622	13.1327	-0.0165389	317.014	-145.181	55.4753	-35.3933																																			-60.1968	1
bta04520	4. Cellular Processes	4.4 Cell Communication	Adherens junction	128.693			122.078	-29.9978	6.61569	-6.61569																																			-18.3068	1
bta04530	4. Cellular Processes	4.4 Cell Communication	Tight junction	266.801			179.487	165.084	87.3141	87.3141																																			126.199	1
bta04540	4. Cellular Processes	4.4 Cell Communication	Gap junction	172.143			148.968	-136.035	23.1757	-23.1757																																			-79.6053	1
bta04610	5. Organismal Systems	5.1 Immune System	Complement and coagulation cascades	887.644	55.954	-55.954	639.62	-52.6459	192.07	-79.5434																																			-62.7144	1
bta04612	5. Organismal Systems	5.1 Immune System	Antigen processing and presentation	139.154			139.154	-139.154																																					-139.154	1
bta04614	5. Organismal Systems	5.2 Endocrine System	Renin-angiotensin system	35.3914			35.3914	-35.3914																																					-35.3914	1
bta04620	5. Organismal Systems	5.1 Immune System	Toll-like receptor signaling pathway	256.27	40.2824	14.6341	202.653	-170.92	13.3342	1.90229																																			-51.4613	1
bta04621	5. Organismal Systems	5.1 Immune System	NOD-like receptor signaling pathway	224.588			155.73	-53.4434	68.8578	68.8578																																			7.70722	1
bta04622	5. Organismal Systems	5.1 Immune System	RIG-I-like receptor signaling pathway	143.825			143.825	-94.3925																																					-94.3925	1
bta04623	5. Organismal Systems	5.1 Immune System	Cytosolic DNA-sensing pathway	80.6914			80.6914	-80.6914																																					-80.6914	1
bta04630	3. Environmental Information Processing	3.2 Signal Transduction	Jak-STAT signaling pathway	95.3483	15.1067	-4.70181	74.7076	-22.4494	5.53399	5.53399																																			-7.20573	1
bta04640	5. Organismal Systems	5.1 Immune System	Hematopoietic cell lineage	221.923	89.6665	78.5411	132.256	-90.3604																																					-5.90962	1
bta04650	5. Organismal Systems	5.1 Immune System	Natural killer cell mediated cytotoxicity	91.9801			91.9801	-20.4885																																					-20.4885	1
bta04660	5. Organismal Systems	5.1 Immune System	T cell receptor signaling pathway	107.864			102.765	-83.3593	5.09953	-5.09953																																			-44.2294	1
bta04662	5. Organismal Systems	5.1 Immune System	B cell receptor signaling pathway	78.5446			70.8953	53.0177	7.6493	-7.6493																																			22.6842	1
bta04664	5. Organismal Systems	5.1 Immune System	Fc epsilon RI signaling pathway	85.0474			85.0474	66.9031																																					66.9031	1
bta04666	5. Organismal Systems	5.1 Immune System	Fc gamma R-mediated phagocytosis	259.123			194.543	-50.8201	64.5801	-64.5801																																			-57.7001	1
bta04670	5. Organismal Systems	5.1 Immune System	Leukocyte transendothelial migration	238.511			205.474	-152.99	33.0365	-33.0365																																			-93.0135	1
bta04672	5. Organismal Systems	5.1 Immune System	Intestinal immune network for IgA production	262.968	17.7366	17.7366	235.827	-100.013	9.40462	-9.40462																																			-30.5603	1
bta04710	5. Organismal Systems	5.9 Environmental Adaptation	Circadian rhythm - mammal	271.94			50.158	50.158	221.782	5.72884																																			27.9434	1
bta04720	5. Organismal Systems	5.6 Nervous System	Long-term potentiation	230.303	51.9602	-51.9602	178.342	-178.342																																					-115.151	1
bta04722	5. Organismal Systems	5.6 Nervous System	Neurotrophin signaling pathway	61.4359			57.0278	-40.2536	4.40807	-4.40807																																			-22.3308	1
bta04724	5. Organismal Systems	5.6 Nervous System	Glutamatergic synapse	158.887	25.7694	-25.7694	133.118	-27.5911																																					-26.6802	1
bta04730	5. Organismal Systems	5.6 Nervous System	Long-term depression	52.6463			52.6463	-35.7505																																					-35.7505	1
bta04740	5. Organismal Systems	5.7 Sensory System	Olfactory transduction	27.0719			27.0719	27.0719																																					27.0719	1
bta04742	5. Organismal Systems	5.7 Sensory System	Taste transduction	295.921	31.188	31.188	264.733	-18.9457																																					6.12112	1
bta04744	5. Organismal Systems	5.7 Sensory System	Phototransduction	0
bta04810	4. Cellular Processes	4.2 Cell Motility	Regulation of actin cytoskeleton	103.579	17.0451	-17.0451	64.6329	-55.9466	21.9015	-21.9015																																			-31.6311	1
bta04910	5. Organismal Systems	5.2 Endocrine System	Insulin signaling pathway	138.994	27.9313	-27.9313	108.052	39.2783	3.01066	3.01066																																			4.78589	1
bta04912	5. Organismal Systems	5.2 Endocrine System	GnRH signaling pathway	197.777			191.658	-156.819	6.11944	-6.11944																																			-81.4695	1
bta04914	5. Organismal Systems	5.2 Endocrine System	Progesterone-mediated oocyte maturation	149.379			124.707	36.1127	24.6718	24.6718																																			30.3923	1
bta04916	5. Organismal Systems	5.2 Endocrine System	Melanogenesis	292.856			250.636	-155.658	42.2204	-3.34845																																			-79.5031	1
bta04920	5. Organismal Systems	5.2 Endocrine System	Adipocytokine signaling pathway	101.679	34.8591	5.42746	61.0496	0.642367	5.77022	5.77022																																			3.94668	1
bta04930	6. Human Diseases	6.5 Metabolic Diseases	Type II diabetes mellitus	136.646	37.5943	-37.5943	90.0201	60.3696	9.03197	9.03197																																			10.6024	1
bta04940	6. Human Diseases	6.5 Metabolic Diseases	Type I diabetes mellitus	131.586	19.0344	19.0344	112.551	-112.551																																					-46.7585	1
bta04950	6. Human Diseases	6.5 Metabolic Diseases	Maturity onset diabetes of the young	237.841	73.3983	-73.3983	146.809	146.809	17.6339	17.6339																																			30.3482	1
bta04960	5. Organismal Systems	5.5 Excretory System	Aldosterone-regulated sodium reabsorption	121.096	22.8205	22.8205	98.2753	-98.2753																																					-37.7274	1
bta04961	5. Organismal Systems	5.5 Excretory System	Endocrine and other factor-regulated calcium reabsorption	314.493	16.715	-16.715	176.306	-125.013	121.472	-121.472																																			-87.7334	1
bta04962	5. Organismal Systems	5.5 Excretory System	Vasopressin-regulated water reabsorption	380.746	23.6066	-23.6066	288.637	106.025	68.5023	68.5023																																			50.3071	1
bta04964	5. Organismal Systems	5.5 Excretory System	Proximal tubule bicarbonate reclamation	534.74	116.923	-116.923	417.817	-86.4938																																					-101.708	1
bta04966	5. Organismal Systems	5.5 Excretory System	Collecting duct acid secretion	0
bta04970	5. Organismal Systems	5.4 Digestive System	Salivary secretion	393.916	50.5689	-50.5689	330.363	-41.6659	12.9835	-12.9835																																			-35.0728	1
bta04971	5. Organismal Systems	5.4 Digestive System	Gastric acid secretion	240.281	11.7276	-11.7276	228.553	-213.371																																					-112.549	1
bta04972	5. Organismal Systems	5.4 Digestive System	Pancreatic secretion	158.296	9.26601	-9.26601	149.03	-110.719																																					-59.9927	1
bta04973	5. Organismal Systems	5.4 Digestive System	Carbohydrate digestion and absorption	101.6			101.6	20.6604																																					20.6604	1
bta04974	5. Organismal Systems	5.4 Digestive System	Protein digestion and absorption	279.191	46.908	-46.908	169.528	60.2681	62.7553	-62.7553																																			-16.4651	1
bta04975	5. Organismal Systems	5.4 Digestive System	Fat digestion and absorption	154.52	58.9115	-58.9115	95.6087	55.8013																																					-1.5551	1
bta04976	5. Organismal Systems	5.4 Digestive System	Bile secretion	283.392	9.04333	-9.04333	268.666	-99.2989	5.68279	5.68279																																			-34.2198	1
bta04977	5. Organismal Systems	5.4 Digestive System	Vitamin digestion and absorption	179.356	179.356	-179.356																																							-179.356	1
bta04978	5. Organismal Systems	5.4 Digestive System	Mineral absorption	266.462	17.1227	-17.1227	210.787	-93.5504	38.5523	-38.5523																																			-49.7418	1
0	#N/A	#N/A	#N/A	0
0	#N/A	#N/A	#N/A	0
0	#N/A	#N/A	#N/A	0
0	#N/A	#N/A	#N/A	0
0	#N/A	#N/A	#N/A	0
0	#N/A	#N/A	#N/A	0
0	#N/A	#N/A	#N/A	0
0	#N/A	#N/A	#N/A	0
0	#N/A	#N/A	#N/A	0
0	#N/A	#N/A	#N/A	0
0	#N/A	#N/A	#N/A	0
0	#N/A	#N/A	#N/A	0
0	#N/A	#N/A	#N/A	0
0	#N/A	#N/A	#N/A	0
0	#N/A	#N/A	#N/A	0
0	#N/A	#N/A	#N/A	0
0	#N/A	#N/A	#N/A	0
0	#N/A	#N/A	#N/A	0
0	#N/A	#N/A	#N/A	0
0	#N/A	#N/A	#N/A	0
0	#N/A	#N/A	#N/A	0
0	#N/A	#N/A	#N/A	0
0	#N/A	#N/A	#N/A	0
0	#N/A	#N/A	#N/A	0
0	#N/A	#N/A	#N/A	0
0	#N/A	#N/A	#N/A	0
0	#N/A	#N/A	#N/A	0
0	#N/A	#N/A	#N/A	0
0	#N/A	#N/A	#N/A	0
0	#N/A	#N/A	#N/A	0
0	#N/A	#N/A	#N/A	0
0	#N/A	#N/A	#N/A	0
0	#N/A	#N/A	#N/A	0
0	#N/A	#N/A	#N/A	0
0	#N/A	#N/A	#N/A	0
0	#N/A	#N/A	#N/A	0
0	#N/A	#N/A	#N/A	0
0	#N/A	#N/A	#N/A	0
0	#N/A	#N/A	#N/A	0
0	#N/A	#N/A	#N/A	0
0	#N/A	#N/A	#N/A	0
0	#N/A	#N/A	#N/A	0
0	#N/A	#N/A	#N/A	0
0	#N/A	#N/A	#N/A	0
0	#N/A	#N/A	#N/A	0
0	#N/A	#N/A	#N/A	0
0	#N/A	#N/A	#N/A	0
0	#N/A	#N/A	#N/A	0
0	#N/A	#N/A	#N/A	0
0	#N/A	#N/A	#N/A	0
0	#N/A	#N/A	#N/A	0
0	#N/A	#N/A	#N/A	0
0	#N/A	#N/A	#N/A	0
0	#N/A	#N/A	#N/A	0
0	#N/A	#N/A	#N/A	0
0	#N/A	#N/A	#N/A	0
0	#N/A	#N/A	#N/A	0
0	#N/A	#N/A	#N/A	0
0	#N/A	#N/A	#N/A	0
0	#N/A	#N/A	#N/A	0
0	#N/A	#N/A	#N/A	0
0	#N/A	#N/A	#N/A	0
0	#N/A	#N/A	#N/A	0
0	#N/A	#N/A	#N/A	0
0	#N/A	#N/A	#N/A	0
0	#N/A	#N/A	#N/A	0
				0

## Sheet: Sheet(D)
Category	K vs G		R vs K		R vs G		0		0		0		0		0		0		0		0		0		0		0		0		0		0		0		0		0		200
1. Metabolism	#VALUE!	#VALUE!	#VALUE!	#VALUE!	#VALUE!	#VALUE!	#VALUE!	#VALUE!	#VALUE!	#VALUE!	#VALUE!	#VALUE!	#VALUE!	#VALUE!	#VALUE!	#VALUE!	#VALUE!	#VALUE!	#VALUE!	#VALUE!	#VALUE!	#VALUE!	#VALUE!	#VALUE!	#VALUE!	#VALUE!	#VALUE!	#VALUE!	#VALUE!	#VALUE!	#VALUE!	#VALUE!	#VALUE!	#VALUE!	#VALUE!	#VALUE!	#VALUE!	#VALUE!	#VALUE!	#VALUE!	-100
0.1 Metabolic Pathways	#VALUE!	#VALUE!	#VALUE!	#VALUE!	#VALUE!	#VALUE!	#VALUE!	#VALUE!	#VALUE!	#VALUE!	#VALUE!	#VALUE!	#VALUE!	#VALUE!	#VALUE!	#VALUE!	#VALUE!	#VALUE!	#VALUE!	#VALUE!	#VALUE!	#VALUE!	#VALUE!	#VALUE!	#VALUE!	#VALUE!	#VALUE!	#VALUE!	#VALUE!	#VALUE!	#VALUE!	#VALUE!	#VALUE!	#VALUE!	#VALUE!	#VALUE!	#VALUE!	#VALUE!	#VALUE!	#VALUE!	100
1.1 Carbohydrate Metabolism	#VALUE!	#VALUE!	#VALUE!	#VALUE!	#VALUE!	#VALUE!	#VALUE!	#VALUE!	#VALUE!	#VALUE!	#VALUE!	#VALUE!	#VALUE!	#VALUE!	#VALUE!	#VALUE!	#VALUE!	#VALUE!	#VALUE!	#VALUE!	#VALUE!	#VALUE!	#VALUE!	#VALUE!	#VALUE!	#VALUE!	#VALUE!	#VALUE!	#VALUE!	#VALUE!	#VALUE!	#VALUE!	#VALUE!	#VALUE!	#VALUE!	#VALUE!	#VALUE!	#VALUE!	#VALUE!	#VALUE!
1.2 Energy Metabolism	#VALUE!	#VALUE!	#VALUE!	#VALUE!	#VALUE!	#VALUE!	#VALUE!	#VALUE!	#VALUE!	#VALUE!	#VALUE!	#VALUE!	#VALUE!	#VALUE!	#VALUE!	#VALUE!	#VALUE!	#VALUE!	#VALUE!	#VALUE!	#VALUE!	#VALUE!	#VALUE!	#VALUE!	#VALUE!	#VALUE!	#VALUE!	#VALUE!	#VALUE!	#VALUE!	#VALUE!	#VALUE!	#VALUE!	#VALUE!	#VALUE!	#VALUE!	#VALUE!	#VALUE!	#VALUE!	#VALUE!
1.3 Lipid Metabolism	#VALUE!	#VALUE!	#VALUE!	#VALUE!	#VALUE!	#VALUE!	#VALUE!	#VALUE!	#VALUE!	#VALUE!	#VALUE!	#VALUE!	#VALUE!	#VALUE!	#VALUE!	#VALUE!	#VALUE!	#VALUE!	#VALUE!	#VALUE!	#VALUE!	#VALUE!	#VALUE!	#VALUE!	#VALUE!	#VALUE!	#VALUE!	#VALUE!	#VALUE!	#VALUE!	#VALUE!	#VALUE!	#VALUE!	#VALUE!	#VALUE!	#VALUE!	#VALUE!	#VALUE!	#VALUE!	#VALUE!
1.4 Nucleotide Metabolism	#VALUE!	#VALUE!	#VALUE!	#VALUE!	#VALUE!	#VALUE!	#VALUE!	#VALUE!	#VALUE!	#VALUE!	#VALUE!	#VALUE!	#VALUE!	#VALUE!	#VALUE!	#VALUE!	#VALUE!	#VALUE!	#VALUE!	#VALUE!	#VALUE!	#VALUE!	#VALUE!	#VALUE!	#VALUE!	#VALUE!	#VALUE!	#VALUE!	#VALUE!	#VALUE!	#VALUE!	#VALUE!	#VALUE!	#VALUE!	#VALUE!	#VALUE!	#VALUE!	#VALUE!	#VALUE!	#VALUE!
1.5 Amino Acid Metabolism	#VALUE!	#VALUE!	#VALUE!	#VALUE!	#VALUE!	#VALUE!	#VALUE!	#VALUE!	#VALUE!	#VALUE!	#VALUE!	#VALUE!	#VALUE!	#VALUE!	#VALUE!	#VALUE!	#VALUE!	#VALUE!	#VALUE!	#VALUE!	#VALUE!	#VALUE!	#VALUE!	#VALUE!	#VALUE!	#VALUE!	#VALUE!	#VALUE!	#VALUE!	#VALUE!	#VALUE!	#VALUE!	#VALUE!	#VALUE!	#VALUE!	#VALUE!	#VALUE!	#VALUE!	#VALUE!	#VALUE!
1.6 Metabolism of Other Amino Acids	#VALUE!	#VALUE!	#VALUE!	#VALUE!	#VALUE!	#VALUE!	#VALUE!	#VALUE!	#VALUE!	#VALUE!	#VALUE!	#VALUE!	#VALUE!	#VALUE!	#VALUE!	#VALUE!	#VALUE!	#VALUE!	#VALUE!	#VALUE!	#VALUE!	#VALUE!	#VALUE!	#VALUE!	#VALUE!	#VALUE!	#VALUE!	#VALUE!	#VALUE!	#VALUE!	#VALUE!	#VALUE!	#VALUE!	#VALUE!	#VALUE!	#VALUE!	#VALUE!	#VALUE!	#VALUE!	#VALUE!
1.7 Glycan Biosynthesis and Metabolism	#VALUE!	#VALUE!	#VALUE!	#VALUE!	#VALUE!	#VALUE!	#VALUE!	#VALUE!	#VALUE!	#VALUE!	#VALUE!	#VALUE!	#VALUE!	#VALUE!	#VALUE!	#VALUE!	#VALUE!	#VALUE!	#VALUE!	#VALUE!	#VALUE!	#VALUE!	#VALUE!	#VALUE!	#VALUE!	#VALUE!	#VALUE!	#VALUE!	#VALUE!	#VALUE!	#VALUE!	#VALUE!	#VALUE!	#VALUE!	#VALUE!	#VALUE!	#VALUE!	#VALUE!	#VALUE!	#VALUE!
1.8 Metabolism of Cofactors and Vitamins	#VALUE!	#VALUE!	#VALUE!	#VALUE!	#VALUE!	#VALUE!	#VALUE!	#VALUE!	#VALUE!	#VALUE!	#VALUE!	#VALUE!	#VALUE!	#VALUE!	#VALUE!	#VALUE!	#VALUE!	#VALUE!	#VALUE!	#VALUE!	#VALUE!	#VALUE!	#VALUE!	#VALUE!	#VALUE!	#VALUE!	#VALUE!	#VALUE!	#VALUE!	#VALUE!	#VALUE!	#VALUE!	#VALUE!	#VALUE!	#VALUE!	#VALUE!	#VALUE!	#VALUE!	#VALUE!	#VALUE!
1.9 Metabolism of Terpenoids and Polyketides	#VALUE!	#VALUE!	#VALUE!	#VALUE!	#VALUE!	#VALUE!	#VALUE!	#VALUE!	#VALUE!	#VALUE!	#VALUE!	#VALUE!	#VALUE!	#VALUE!	#VALUE!	#VALUE!	#VALUE!	#VALUE!	#VALUE!	#VALUE!	#VALUE!	#VALUE!	#VALUE!	#VALUE!	#VALUE!	#VALUE!	#VALUE!	#VALUE!	#VALUE!	#VALUE!	#VALUE!	#VALUE!	#VALUE!	#VALUE!	#VALUE!	#VALUE!	#VALUE!	#VALUE!	#VALUE!	#VALUE!
1.10 Biosynthesis of Other Secondary Metabolites	#VALUE!	#VALUE!	#VALUE!	#VALUE!	#VALUE!	#VALUE!	#VALUE!	#VALUE!	#VALUE!	#VALUE!	#VALUE!	#VALUE!	#VALUE!	#VALUE!	#VALUE!	#VALUE!	#VALUE!	#VALUE!	#VALUE!	#VALUE!	#VALUE!	#VALUE!	#VALUE!	#VALUE!	#VALUE!	#VALUE!	#VALUE!	#VALUE!	#VALUE!	#VALUE!	#VALUE!	#VALUE!	#VALUE!	#VALUE!	#VALUE!	#VALUE!	#VALUE!	#VALUE!	#VALUE!	#VALUE!
1.11 Xenobiotics Biodegradation and Metabolism	#VALUE!	#VALUE!	#VALUE!	#VALUE!	#VALUE!	#VALUE!	#VALUE!	#VALUE!	#VALUE!	#VALUE!	#VALUE!	#VALUE!	#VALUE!	#VALUE!	#VALUE!	#VALUE!	#VALUE!	#VALUE!	#VALUE!	#VALUE!	#VALUE!	#VALUE!	#VALUE!	#VALUE!	#VALUE!	#VALUE!	#VALUE!	#VALUE!	#VALUE!	#VALUE!	#VALUE!	#VALUE!	#VALUE!	#VALUE!	#VALUE!	#VALUE!	#VALUE!	#VALUE!	#VALUE!	#VALUE!
2. Genetic Information Processing	#VALUE!	#VALUE!	#VALUE!	#VALUE!	#VALUE!	#VALUE!	#VALUE!	#VALUE!	#VALUE!	#VALUE!	#VALUE!	#VALUE!	#VALUE!	#VALUE!	#VALUE!	#VALUE!	#VALUE!	#VALUE!	#VALUE!	#VALUE!	#VALUE!	#VALUE!	#VALUE!	#VALUE!	#VALUE!	#VALUE!	#VALUE!	#VALUE!	#VALUE!	#VALUE!	#VALUE!	#VALUE!	#VALUE!	#VALUE!	#VALUE!	#VALUE!	#VALUE!	#VALUE!	#VALUE!	#VALUE!
2.1 Transcription	#VALUE!	#VALUE!	#VALUE!	#VALUE!	#VALUE!	#VALUE!	#VALUE!	#VALUE!	#VALUE!	#VALUE!	#VALUE!	#VALUE!	#VALUE!	#VALUE!	#VALUE!	#VALUE!	#VALUE!	#VALUE!	#VALUE!	#VALUE!	#VALUE!	#VALUE!	#VALUE!	#VALUE!	#VALUE!	#VALUE!	#VALUE!	#VALUE!	#VALUE!	#VALUE!	#VALUE!	#VALUE!	#VALUE!	#VALUE!	#VALUE!	#VALUE!	#VALUE!	#VALUE!	#VALUE!	#VALUE!
2.2 Translation	#VALUE!	#VALUE!	#VALUE!	#VALUE!	#VALUE!	#VALUE!	#VALUE!	#VALUE!	#VALUE!	#VALUE!	#VALUE!	#VALUE!	#VALUE!	#VALUE!	#VALUE!	#VALUE!	#VALUE!	#VALUE!	#VALUE!	#VALUE!	#VALUE!	#VALUE!	#VALUE!	#VALUE!	#VALUE!	#VALUE!	#VALUE!	#VALUE!	#VALUE!	#VALUE!	#VALUE!	#VALUE!	#VALUE!	#VALUE!	#VALUE!	#VALUE!	#VALUE!	#VALUE!	#VALUE!	#VALUE!
2.3 Folding, Sorting and Degradation	#VALUE!	#VALUE!	#VALUE!	#VALUE!	#VALUE!	#VALUE!	#VALUE!	#VALUE!	#VALUE!	#VALUE!	#VALUE!	#VALUE!	#VALUE!	#VALUE!	#VALUE!	#VALUE!	#VALUE!	#VALUE!	#VALUE!	#VALUE!	#VALUE!	#VALUE!	#VALUE!	#VALUE!	#VALUE!	#VALUE!	#VALUE!	#VALUE!	#VALUE!	#VALUE!	#VALUE!	#VALUE!	#VALUE!	#VALUE!	#VALUE!	#VALUE!	#VALUE!	#VALUE!	#VALUE!	#VALUE!
2.4 Replication and Repair	#VALUE!	#VALUE!	#VALUE!	#VALUE!	#VALUE!	#VALUE!	#VALUE!	#VALUE!	#VALUE!	#VALUE!	#VALUE!	#VALUE!	#VALUE!	#VALUE!	#VALUE!	#VALUE!	#VALUE!	#VALUE!	#VALUE!	#VALUE!	#VALUE!	#VALUE!	#VALUE!	#VALUE!	#VALUE!	#VALUE!	#VALUE!	#VALUE!	#VALUE!	#VALUE!	#VALUE!	#VALUE!	#VALUE!	#VALUE!	#VALUE!	#VALUE!	#VALUE!	#VALUE!	#VALUE!	#VALUE!
3. Environmental Information Processing	#VALUE!	#VALUE!	#VALUE!	#VALUE!	#VALUE!	#VALUE!	#VALUE!	#VALUE!	#VALUE!	#VALUE!	#VALUE!	#VALUE!	#VALUE!	#VALUE!	#VALUE!	#VALUE!	#VALUE!	#VALUE!	#VALUE!	#VALUE!	#VALUE!	#VALUE!	#VALUE!	#VALUE!	#VALUE!	#VALUE!	#VALUE!	#VALUE!	#VALUE!	#VALUE!	#VALUE!	#VALUE!	#VALUE!	#VALUE!	#VALUE!	#VALUE!	#VALUE!	#VALUE!	#VALUE!	#VALUE!
3.1 Membrane transport	#VALUE!	#VALUE!	#VALUE!	#VALUE!	#VALUE!	#VALUE!	#VALUE!	#VALUE!	#VALUE!	#VALUE!	#VALUE!	#VALUE!	#VALUE!	#VALUE!	#VALUE!	#VALUE!	#VALUE!	#VALUE!	#VALUE!	#VALUE!	#VALUE!	#VALUE!	#VALUE!	#VALUE!	#VALUE!	#VALUE!	#VALUE!	#VALUE!	#VALUE!	#VALUE!	#VALUE!	#VALUE!	#VALUE!	#VALUE!	#VALUE!	#VALUE!	#VALUE!	#VALUE!	#VALUE!	#VALUE!
3.2 Signal Transduction	#VALUE!	#VALUE!	#VALUE!	#VALUE!	#VALUE!	#VALUE!	#VALUE!	#VALUE!	#VALUE!	#VALUE!	#VALUE!	#VALUE!	#VALUE!	#VALUE!	#VALUE!	#VALUE!	#VALUE!	#VALUE!	#VALUE!	#VALUE!	#VALUE!	#VALUE!	#VALUE!	#VALUE!	#VALUE!	#VALUE!	#VALUE!	#VALUE!	#VALUE!	#VALUE!	#VALUE!	#VALUE!	#VALUE!	#VALUE!	#VALUE!	#VALUE!	#VALUE!	#VALUE!	#VALUE!	#VALUE!
3.3 Signaling Molecules and Interaction	#VALUE!	#VALUE!	#VALUE!	#VALUE!	#VALUE!	#VALUE!	#VALUE!	#VALUE!	#VALUE!	#VALUE!	#VALUE!	#VALUE!	#VALUE!	#VALUE!	#VALUE!	#VALUE!	#VALUE!	#VALUE!	#VALUE!	#VALUE!	#VALUE!	#VALUE!	#VALUE!	#VALUE!	#VALUE!	#VALUE!	#VALUE!	#VALUE!	#VALUE!	#VALUE!	#VALUE!	#VALUE!	#VALUE!	#VALUE!	#VALUE!	#VALUE!	#VALUE!	#VALUE!	#VALUE!	#VALUE!
4. Cellular Processes	#VALUE!	#VALUE!	#VALUE!	#VALUE!	#VALUE!	#VALUE!	#VALUE!	#VALUE!	#VALUE!	#VALUE!	#VALUE!	#VALUE!	#VALUE!	#VALUE!	#VALUE!	#VALUE!	#VALUE!	#VALUE!	#VALUE!	#VALUE!	#VALUE!	#VALUE!	#VALUE!	#VALUE!	#VALUE!	#VALUE!	#VALUE!	#VALUE!	#VALUE!	#VALUE!	#VALUE!	#VALUE!	#VALUE!	#VALUE!	#VALUE!	#VALUE!	#VALUE!	#VALUE!	#VALUE!	#VALUE!
4.1 Transport and Catabolism	#VALUE!	#VALUE!	#VALUE!	#VALUE!	#VALUE!	#VALUE!	#VALUE!	#VALUE!	#VALUE!	#VALUE!	#VALUE!	#VALUE!	#VALUE!	#VALUE!	#VALUE!	#VALUE!	#VALUE!	#VALUE!	#VALUE!	#VALUE!	#VALUE!	#VALUE!	#VALUE!	#VALUE!	#VALUE!	#VALUE!	#VALUE!	#VALUE!	#VALUE!	#VALUE!	#VALUE!	#VALUE!	#VALUE!	#VALUE!	#VALUE!	#VALUE!	#VALUE!	#VALUE!	#VALUE!	#VALUE!
4.2 Cell Motility	#VALUE!	#VALUE!	#VALUE!	#VALUE!	#VALUE!	#VALUE!	#VALUE!	#VALUE!	#VALUE!	#VALUE!	#VALUE!	#VALUE!	#VALUE!	#VALUE!	#VALUE!	#VALUE!	#VALUE!	#VALUE!	#VALUE!	#VALUE!	#VALUE!	#VALUE!	#VALUE!	#VALUE!	#VALUE!	#VALUE!	#VALUE!	#VALUE!	#VALUE!	#VALUE!	#VALUE!	#VALUE!	#VALUE!	#VALUE!	#VALUE!	#VALUE!	#VALUE!	#VALUE!	#VALUE!	#VALUE!
4.3 Cell Growth and Death	#VALUE!	#VALUE!	#VALUE!	#VALUE!	#VALUE!	#VALUE!	#VALUE!	#VALUE!	#VALUE!	#VALUE!	#VALUE!	#VALUE!	#VALUE!	#VALUE!	#VALUE!	#VALUE!	#VALUE!	#VALUE!	#VALUE!	#VALUE!	#VALUE!	#VALUE!	#VALUE!	#VALUE!	#VALUE!	#VALUE!	#VALUE!	#VALUE!	#VALUE!	#VALUE!	#VALUE!	#VALUE!	#VALUE!	#VALUE!	#VALUE!	#VALUE!	#VALUE!	#VALUE!	#VALUE!	#VALUE!
4.4 Cell Communication	#VALUE!	#VALUE!	#VALUE!	#VALUE!	#VALUE!	#VALUE!	#VALUE!	#VALUE!	#VALUE!	#VALUE!	#VALUE!	#VALUE!	#VALUE!	#VALUE!	#VALUE!	#VALUE!	#VALUE!	#VALUE!	#VALUE!	#VALUE!	#VALUE!	#VALUE!	#VALUE!	#VALUE!	#VALUE!	#VALUE!	#VALUE!	#VALUE!	#VALUE!	#VALUE!	#VALUE!	#VALUE!	#VALUE!	#VALUE!	#VALUE!	#VALUE!	#VALUE!	#VALUE!	#VALUE!	#VALUE!
5. Organismal Systems	#VALUE!	#VALUE!	#VALUE!	#VALUE!	#VALUE!	#VALUE!	#VALUE!	#VALUE!	#VALUE!	#VALUE!	#VALUE!	#VALUE!	#VALUE!	#VALUE!	#VALUE!	#VALUE!	#VALUE!	#VALUE!	#VALUE!	#VALUE!	#VALUE!	#VALUE!	#VALUE!	#VALUE!	#VALUE!	#VALUE!	#VALUE!	#VALUE!	#VALUE!	#VALUE!	#VALUE!	#VALUE!	#VALUE!	#VALUE!	#VALUE!	#VALUE!	#VALUE!	#VALUE!	#VALUE!	#VALUE!
5.1 Immune System	#VALUE!	#VALUE!	#VALUE!	#VALUE!	#VALUE!	#VALUE!	#VALUE!	#VALUE!	#VALUE!	#VALUE!	#VALUE!	#VALUE!	#VALUE!	#VALUE!	#VALUE!	#VALUE!	#VALUE!	#VALUE!	#VALUE!	#VALUE!	#VALUE!	#VALUE!	#VALUE!	#VALUE!	#VALUE!	#VALUE!	#VALUE!	#VALUE!	#VALUE!	#VALUE!	#VALUE!	#VALUE!	#VALUE!	#VALUE!	#VALUE!	#VALUE!	#VALUE!	#VALUE!	#VALUE!	#VALUE!
5.2 Endocrine System	#VALUE!	#VALUE!	#VALUE!	#VALUE!	#VALUE!	#VALUE!	#VALUE!	#VALUE!	#VALUE!	#VALUE!	#VALUE!	#VALUE!	#VALUE!	#VALUE!	#VALUE!	#VALUE!	#VALUE!	#VALUE!	#VALUE!	#VALUE!	#VALUE!	#VALUE!	#VALUE!	#VALUE!	#VALUE!	#VALUE!	#VALUE!	#VALUE!	#VALUE!	#VALUE!	#VALUE!	#VALUE!	#VALUE!	#VALUE!	#VALUE!	#VALUE!	#VALUE!	#VALUE!	#VALUE!	#VALUE!
5.3 Circulatory System	#VALUE!	#VALUE!	#VALUE!	#VALUE!	#VALUE!	#VALUE!	#VALUE!	#VALUE!	#VALUE!	#VALUE!	#VALUE!	#VALUE!	#VALUE!	#VALUE!	#VALUE!	#VALUE!	#VALUE!	#VALUE!	#VALUE!	#VALUE!	#VALUE!	#VALUE!	#VALUE!	#VALUE!	#VALUE!	#VALUE!	#VALUE!	#VALUE!	#VALUE!	#VALUE!	#VALUE!	#VALUE!	#VALUE!	#VALUE!	#VALUE!	#VALUE!	#VALUE!	#VALUE!	#VALUE!	#VALUE!
5.4 Digestive System	#VALUE!	#VALUE!	#VALUE!	#VALUE!	#VALUE!	#VALUE!	#VALUE!	#VALUE!	#VALUE!	#VALUE!	#VALUE!	#VALUE!	#VALUE!	#VALUE!	#VALUE!	#VALUE!	#VALUE!	#VALUE!	#VALUE!	#VALUE!	#VALUE!	#VALUE!	#VALUE!	#VALUE!	#VALUE!	#VALUE!	#VALUE!	#VALUE!	#VALUE!	#VALUE!	#VALUE!	#VALUE!	#VALUE!	#VALUE!	#VALUE!	#VALUE!	#VALUE!	#VALUE!	#VALUE!	#VALUE!
5.5 Excretory System	#VALUE!	#VALUE!	#VALUE!	#VALUE!	#VALUE!	#VALUE!	#VALUE!	#VALUE!	#VALUE!	#VALUE!	#VALUE!	#VALUE!	#VALUE!	#VALUE!	#VALUE!	#VALUE!	#VALUE!	#VALUE!	#VALUE!	#VALUE!	#VALUE!	#VALUE!	#VALUE!	#VALUE!	#VALUE!	#VALUE!	#VALUE!	#VALUE!	#VALUE!	#VALUE!	#VALUE!	#VALUE!	#VALUE!	#VALUE!	#VALUE!	#VALUE!	#VALUE!	#VALUE!	#VALUE!	#VALUE!
5.6 Nervous System	#VALUE!	#VALUE!	#VALUE!	#VALUE!	#VALUE!	#VALUE!	#VALUE!	#VALUE!	#VALUE!	#VALUE!	#VALUE!	#VALUE!	#VALUE!	#VALUE!	#VALUE!	#VALUE!	#VALUE!	#VALUE!	#VALUE!	#VALUE!	#VALUE!	#VALUE!	#VALUE!	#VALUE!	#VALUE!	#VALUE!	#VALUE!	#VALUE!	#VALUE!	#VALUE!	#VALUE!	#VALUE!	#VALUE!	#VALUE!	#VALUE!	#VALUE!	#VALUE!	#VALUE!	#VALUE!	#VALUE!
5.7 Sensory System	#VALUE!	#VALUE!	#VALUE!	#VALUE!	#VALUE!	#VALUE!	#VALUE!	#VALUE!	#VALUE!	#VALUE!	#VALUE!	#VALUE!	#VALUE!	#VALUE!	#VALUE!	#VALUE!	#VALUE!	#VALUE!	#VALUE!	#VALUE!	#VALUE!	#VALUE!	#VALUE!	#VALUE!	#VALUE!	#VALUE!	#VALUE!	#VALUE!	#VALUE!	#VALUE!	#VALUE!	#VALUE!	#VALUE!	#VALUE!	#VALUE!	#VALUE!	#VALUE!	#VALUE!	#VALUE!	#VALUE!
5.8 Development	#VALUE!	#VALUE!	#VALUE!	#VALUE!	#VALUE!	#VALUE!	#VALUE!	#VALUE!	#VALUE!	#VALUE!	#VALUE!	#VALUE!	#VALUE!	#VALUE!	#VALUE!	#VALUE!	#VALUE!	#VALUE!	#VALUE!	#VALUE!	#VALUE!	#VALUE!	#VALUE!	#VALUE!	#VALUE!	#VALUE!	#VALUE!	#VALUE!	#VALUE!	#VALUE!	#VALUE!	#VALUE!	#VALUE!	#VALUE!	#VALUE!	#VALUE!	#VALUE!	#VALUE!	#VALUE!	#VALUE!
5.9 Environmental Adaptation	#VALUE!	#VALUE!	#VALUE!	#VALUE!	#VALUE!	#VALUE!	#VALUE!	#VALUE!	#VALUE!	#VALUE!	#VALUE!	#VALUE!	#VALUE!	#VALUE!	#VALUE!	#VALUE!	#VALUE!	#VALUE!	#VALUE!	#VALUE!	#VALUE!	#VALUE!	#VALUE!	#VALUE!	#VALUE!	#VALUE!	#VALUE!	#VALUE!	#VALUE!	#VALUE!	#VALUE!	#VALUE!	#VALUE!	#VALUE!	#VALUE!	#VALUE!	#VALUE!	#VALUE!	#VALUE!	#VALUE!
							#VALUE!	#VALUE!	#VALUE!	#VALUE!	#VALUE!	#VALUE!	#VALUE!	#VALUE!	#VALUE!	#VALUE!	#VALUE!	#VALUE!	#VALUE!	#VALUE!	#VALUE!	#VALUE!	#VALUE!	#VALUE!	#VALUE!	#VALUE!	#VALUE!	#VALUE!	#VALUE!	#VALUE!	#VALUE!	#VALUE!	#VALUE!	#VALUE!	#VALUE!	#VALUE!	#VALUE!	#VALUE!	#VALUE!	#VALUE!
							#VALUE!	#VALUE!	#VALUE!	#VALUE!	#VALUE!	#VALUE!	#VALUE!	#VALUE!	#VALUE!	#VALUE!	#VALUE!	#VALUE!	#VALUE!	#VALUE!	#VALUE!	#VALUE!	#VALUE!	#VALUE!	#VALUE!	#VALUE!	#VALUE!	#VALUE!	#VALUE!	#VALUE!	#VALUE!	#VALUE!	#VALUE!	#VALUE!	#VALUE!	#VALUE!	#VALUE!	#VALUE!	#VALUE!	#VALUE!
							#VALUE!	#VALUE!	#VALUE!	#VALUE!	#VALUE!	#VALUE!	#VALUE!	#VALUE!	#VALUE!	#VALUE!	#VALUE!	#VALUE!	#VALUE!	#VALUE!	#VALUE!	#VALUE!	#VALUE!	#VALUE!	#VALUE!	#VALUE!	#VALUE!	#VALUE!	#VALUE!	#VALUE!	#VALUE!	#VALUE!	#VALUE!	#VALUE!	#VALUE!	#VALUE!	#VALUE!	#VALUE!	#VALUE!	#VALUE!
							#VALUE!	#VALUE!	#VALUE!	#VALUE!	#VALUE!	#VALUE!	#VALUE!	#VALUE!	#VALUE!	#VALUE!	#VALUE!	#VALUE!	#VALUE!	#VALUE!	#VALUE!	#VALUE!	#VALUE!	#VALUE!	#VALUE!	#VALUE!	#VALUE!	#VALUE!	#VALUE!	#VALUE!	#VALUE!	#VALUE!	#VALUE!	#VALUE!	#VALUE!	#VALUE!	#VALUE!	#VALUE!	#VALUE!	#VALUE!
							#VALUE!	#VALUE!	#VALUE!	#VALUE!	#VALUE!	#VALUE!	#VALUE!	#VALUE!	#VALUE!	#VALUE!	#VALUE!	#VALUE!	#VALUE!	#VALUE!	#VALUE!	#VALUE!	#VALUE!	#VALUE!	#VALUE!	#VALUE!	#VALUE!	#VALUE!	#VALUE!	#VALUE!	#VALUE!	#VALUE!	#VALUE!	#VALUE!	#VALUE!	#VALUE!	#VALUE!	#VALUE!	#VALUE!	#VALUE!
							#VALUE!	#VALUE!	#VALUE!	#VALUE!	#VALUE!	#VALUE!	#VALUE!	#VALUE!	#VALUE!	#VALUE!	#VALUE!	#VALUE!	#VALUE!	#VALUE!	#VALUE!	#VALUE!	#VALUE!	#VALUE!	#VALUE!	#VALUE!	#VALUE!	#VALUE!	#VALUE!	#VALUE!	#VALUE!	#VALUE!	#VALUE!	#VALUE!	#VALUE!	#VALUE!	#VALUE!	#VALUE!	#VALUE!	#VALUE!
							#VALUE!	#VALUE!	#VALUE!	#VALUE!	#VALUE!	#VALUE!	#VALUE!	#VALUE!	#VALUE!	#VALUE!	#VALUE!	#VALUE!	#VALUE!	#VALUE!	#VALUE!	#VALUE!	#VALUE!	#VALUE!	#VALUE!	#VALUE!	#VALUE!	#VALUE!	#VALUE!	#VALUE!	#VALUE!	#VALUE!	#VALUE!	#VALUE!	#VALUE!	#VALUE!	#VALUE!	#VALUE!	#VALUE!	#VALUE!

## Sheet: Sheet(E)
200	-100	100	Pathway	Impact	Flux		5689.77	5689.77	30333.6	30333.6	7596.46	7596.46	0	0	0	0	0	0	0	0	0	0	0	0	0	0	0	0	0	0	0	0	0	0	0	0	0	0	0	0	0	0	0	0	0	0	Click Ctrl+Shift+F to run the Macro	Pathway	Impact
1	1. Metabolism	1.1 Carbohydrate Metabolism	Glycolysis / Gluconeogenesis	55.0656	24.3719	1	46.0405	-46.0405	95.2074	95.2074	23.9487	23.9487																																				Glyoxylate and dicarboxylate metabolism	502.358
1	1. Metabolism	1.1 Carbohydrate Metabolism	Citrate cycle (TCA cycle)	32.8115	11.5036	1	31.9618	-31.9618	41.7536	41.7536	24.7189	24.7189																																				Caffeine metabolism	457.674
1	1. Metabolism	1.1 Carbohydrate Metabolism	Pentose phosphate pathway	15.9035	15.9035	1	0	0	29.7173	29.7173	17.993	17.993																																				Butirosin and neomycin biosynthesis	416.222
1	1. Metabolism	1.1 Carbohydrate Metabolism	Pentose and glucuronate interconversions	20.8266	-20.8266	1	62.4799	-62.4799	0	0	0	0																																				Glycosaminoglycan biosynthesis - keratan sulfate	414.155
1	1. Metabolism	1.1 Carbohydrate Metabolism	Fructose and mannose metabolism	14.8269	14.8269	1	0	0	29.8614	29.8614	14.6193	14.6193																																				Galactose metabolism	381.863
1	1. Metabolism	1.1 Carbohydrate Metabolism	Galactose metabolism	415.068	171.082	1	219.088	-219.088	836.048	836.048	190.068	-103.713																																				Prion diseases	338.637
1	1. Metabolism	1.1 Carbohydrate Metabolism	Ascorbate and aldarate metabolism																																													Staphylococcus aureus infection	329.428
1	1. Metabolism	1.3 Lipid Metabolism	Fatty acid biosynthesis	170.927	170.927	1	0	0	512.782	512.782	0	0																																				Glycosphingolipid biosynthesis - globo series	310.61
1	1. Metabolism	1.3 Lipid Metabolism	Fatty acid elongation in mitochondria																																													Glycosphingolipid biosynthesis - ganglio series	310.61
1	1. Metabolism	1.3 Lipid Metabolism	Fatty acid metabolism	19.202	-12.7206	1	0	0	47.8838	-47.8838	9.72207	9.72207																																				Complement and coagulation cascades	300.233
1	1. Metabolism	1.3 Lipid Metabolism	Synthesis and degradation of ketone bodies	134.006	134.006	1	0	0	357.729	357.729	44.2894	44.2894																																				Nitrogen metabolism	262.463
1	1. Metabolism	1.3 Lipid Metabolism	Steroid biosynthesis	101.87	50.872	1	36.1742	-36.1742	269.435	188.79	0	0																																				Propanoate metabolism	239.578
1	1. Metabolism	1.3 Lipid Metabolism	Primary bile acid biosynthesis																																													Malaria	219.578
1	1. Metabolism	1.8 Metabolism of Cofactors and Vitamins	Ubiquinone and other terpenoid-quinone biosynthesis																																													O-Glycan biosynthesis	197.839
1	1. Metabolism	1.3 Lipid Metabolism	Steroid hormone biosynthesis	5.78792	5.78792	1	0	0	17.3637	17.3637	0	0																																				Dorso-ventral axis formation	187.705
1	1. Metabolism	1.2 Energy Metabolism	Oxidative phosphorylation	3.85262	3.85262	1	0	0	11.5578	11.5578	0	0																																				Valine, leucine and isoleucine degradation	185.553
1	1. Metabolism	1.4 Nucleotide Metabolism	Purine metabolism	69.7866	-54.1345	1	20.5291	-20.5291	155.166	-108.21	33.6645	-33.6645																																				African trypanosomiasis	183.456
1	1. Metabolism	1.10 Biosynthesis of Other Secondary Metabolites	Caffeine metabolism	457.674	30.6699	1	640.506	-640.506	732.516	732.516	0	0																																				Proximal tubule bicarbonate reclamation	178.247
1	1. Metabolism	1.4 Nucleotide Metabolism	Pyrimidine metabolism	24.952	-18.374	1	0	0	70.4591	-59.519	4.39708	4.39708																																				Systemic lupus erythematosus	159.245
1	1. Metabolism	1.5 Amino Acid Metabolism	Alanine, aspartate and glutamate metabolism	38.2068	13.078	1	37.6932	-37.6932	76.9273	76.9273	0	0																																				Ribosome	149.785
1	1. Metabolism	1.5 Amino Acid Metabolism	Glycine, serine and threonine metabolism	35.4276	11.991	1	22.7519	-22.7519	71.1279	71.1279	12.4029	-12.4029																																				Taurine and hypotaurine metabolism	147.268
1	1. Metabolism	1.5 Amino Acid Metabolism	Cysteine and methionine metabolism	59.4963	20.8318	1	57.9967	-57.9967	67.7991	67.7991	52.693	52.693																																				PPAR signaling pathway	145.886
1	1. Metabolism	1.5 Amino Acid Metabolism	Valine, leucine and isoleucine degradation	175.935	163.247	1	13.0598	13.0598	283.216	245.15	231.53	231.53																																				Fatty acid biosynthesis	142.439
1	1. Metabolism	1.5 Amino Acid Metabolism	Valine, leucine and isoleucine biosynthesis																																													Synthesis and degradation of ketone bodies	134.006
1	1. Metabolism	1.5 Amino Acid Metabolism	Lysine biosynthesis																																													Amoebiasis	128.521
1	1. Metabolism	1.5 Amino Acid Metabolism	Lysine degradation	10.3017	10.3017	1	0	0	22.0471	22.0471	8.85789	8.85789																																				Salivary secretion	124.484
1	1. Metabolism	1.5 Amino Acid Metabolism	Arginine and proline metabolism	27.4332	27.4332	1	0	0	18.331	18.331	63.9687	63.9687																																				Vasopressin-regulated water reabsorption	121.012
1	1. Metabolism	1.5 Amino Acid Metabolism	Histidine metabolism																																													SNARE interactions in vesicular transport	120.406
1	1. Metabolism	1.5 Amino Acid Metabolism	Tyrosine metabolism	18.8968	-7.19731	1	17.5492	17.5492	25.5754	-25.5754	13.5657	-13.5657																																				Phenylalanine, tyrosine and tryptophan biosynthesis	119.821
1	1. Metabolism	1.5 Amino Acid Metabolism	Phenylalanine metabolism	9.04381	-9.04381	1	0	0	0	0	27.1314	-27.1314																																				Cell adhesion molecules (CAMs)	119.503
1	1. Metabolism	1.5 Amino Acid Metabolism	Tryptophan metabolism	14.1158	1.12512	1	13.3708	13.3708	19.486	-19.486	9.49059	9.49059																																				Endocrine and other factor-regulated calcium reabsorption	119.195
1	1. Metabolism	1.5 Amino Acid Metabolism	Phenylalanine, tyrosine and tryptophan biosynthesis																																													Sulfur relay system	117.351
1	1. Metabolism	1.6 Metabolism of Other Amino Acids	beta-Alanine metabolism	5.78804	-5.78804	1	0	0	0	0	17.3641	-17.3641																																				Ubiquitin mediated proteolysis	114.472
1	1. Metabolism	1.6 Metabolism of Other Amino Acids	Taurine and hypotaurine metabolism	165.677	165.677	1	0	0	279.671	279.671	217.359	217.359																																				Viral myocarditis	113.473
1	1. Metabolism	1.6 Metabolism of Other Amino Acids	Selenoamino acid metabolism																																													ECM-receptor interaction	112.277
1	1. Metabolism	1.6 Metabolism of Other Amino Acids	Cyanoamino acid metabolism																																													Starch and sucrose metabolism	106.432
1	1. Metabolism	1.6 Metabolism of Other Amino Acids	D-Glutamine and D-glutamate metabolism																																													Bile secretion	105.965
1	1. Metabolism	1.6 Metabolism of Other Amino Acids	D-Arginine and D-ornithine metabolism																																													Glycerolipid metabolism	105.223
1	1. Metabolism	1.6 Metabolism of Other Amino Acids	Glutathione metabolism	25.8586	12.6072	1	8.08005	-8.08005	69.4958	45.9016	0	0																																				Fc gamma R-mediated phagocytosis	104.243
1	1. Metabolism	1.1 Carbohydrate Metabolism	Starch and sucrose metabolism	122.083	-3.70923	1	165.315	-13.3281	90.6762	90.6762	110.259	-88.4757																																				Vitamin B6 metabolism	103.633
1	1. Metabolism	1.7 Glycan Biosynthesis and Metabolism	N-Glycan biosynthesis	99.7067	-64.4026	1	0	0	232.563	-126.65	66.5574	-66.5574																																				Amino sugar and nucleotide sugar metabolism	103.528
1	1. Metabolism	1.7 Glycan Biosynthesis and Metabolism	Other glycan degradation	25.833	-25.833	1	0	0	48.9938	-48.9938	28.5052	-28.5052																																				Steroid biosynthesis	101.87
1	1. Metabolism	1.7 Glycan Biosynthesis and Metabolism	O-Glycan biosynthesis	197.839	-197.839	1	0	0	325.625	-325.625	267.891	-267.891																																				Folate biosynthesis	99.2966
1	1. Metabolism	1.7 Glycan Biosynthesis and Metabolism	O-Mannosyl glycan biosynthesis	15.8332	15.8332	1	0	0	47.4996	47.4996	0	0																																				Glioma	98.1305
1	1. Metabolism	1.1 Carbohydrate Metabolism	Amino sugar and nucleotide sugar metabolism	108.129	0.0957379	1	111.978	-111.978	170.767	90.8932	41.6428	21.3724																																				GnRH signaling pathway	97.08
1	1. Metabolism	1.10 Biosynthesis of Other Secondary Metabolites	Butirosin and neomycin biosynthesis	554.963	212.437	1	513.788	-513.788	1027.66	1027.66	123.437	123.437																																				Base excision repair	96.5518
1	1. Metabolism	1.7 Glycan Biosynthesis and Metabolism	Glycosaminoglycan degradation	21.7541	-21.7541	1	0	0	41.258	-41.258	24.0044	-24.0044																																				Basal transcription factors	95.8004
1	1. Metabolism	1.7 Glycan Biosynthesis and Metabolism	Glycosaminoglycan biosynthesis - chondroitin sulfate																																													Phagosome	95.4282
1	1. Metabolism	1.7 Glycan Biosynthesis and Metabolism	Glycosaminoglycan biosynthesis - keratan sulfate	414.155	-350.822	1	0	0	724.542	-534.543	517.922	-517.922																																				N-Glycan biosynthesis	95.2753
1	1. Metabolism	1.7 Glycan Biosynthesis and Metabolism	Glycosaminoglycan biosynthesis - heparan sulfate																																													Melanogenesis	93.4648
1	1. Metabolism	1.3 Lipid Metabolism	Glycerolipid metabolism	107.415	17.0956	1	135.479	-135.479	172.741	172.741	14.0244	14.0244																																				Protein digestion and absorption	92.1493
1	1. Metabolism	1.1 Carbohydrate Metabolism	Inositol phosphate metabolism	20.4357	-20.4357	1	0	0	61.3071	-61.3071	0	0																																				Mineral absorption	91.0411
1	1. Metabolism	1.7 Glycan Biosynthesis and Metabolism	Glycosylphosphatidylinositol(GPI)-anchor biosynthesis																																													Glutamatergic synapse	88.8991
1	1. Metabolism	1.3 Lipid Metabolism	Glycerophospholipid metabolism	63.4774	11.0674	1	70.5869	-70.5869	112.149	96.0925	7.6964	7.6964																																				Leukocyte transendothelial migration	87.7181
1	1. Metabolism	1.3 Lipid Metabolism	Ether lipid metabolism	29.2838	29.2838	1	0	0	69.5725	69.5725	18.2789	18.2789																																				Axon guidance	86.5709
1	1. Metabolism	1.3 Lipid Metabolism	Arachidonic acid metabolism																																													Taste transduction	84.5488
1	1. Metabolism	1.3 Lipid Metabolism	Linoleic acid metabolism																																													Leishmaniasis	84.4433
1	1. Metabolism	1.3 Lipid Metabolism	alpha-Linolenic acid metabolism																																													Protein export	84.3102
1	1. Metabolism	1.3 Lipid Metabolism	Sphingolipid metabolism																																													Endocytosis	83.8062
1	1. Metabolism	1.7 Glycan Biosynthesis and Metabolism	Glycosphingolipid biosynthesis - lacto and neolacto series	17.5924	17.5924	1	0	0	52.7773	52.7773	0	0																																				Toll-like receptor signaling pathway	83.6337
1	1. Metabolism	1.7 Glycan Biosynthesis and Metabolism	Glycosphingolipid biosynthesis - globo series	332.796	-332.796	1	0	0	564.627	-564.627	433.761	-433.761																																				Tight junction	82.5305
1	1. Metabolism	1.7 Glycan Biosynthesis and Metabolism	Glycosphingolipid biosynthesis - ganglio series	332.796	-332.796	1	0	0	564.627	-564.627	433.761	-433.761																																				Intestinal immune network for IgA production	82.0609
1	1. Metabolism	1.1 Carbohydrate Metabolism	Pyruvate metabolism	48.6408	29.3195	1	28.982	-28.982	93.6855	93.6855	23.255	23.255																																				ErbB signaling pathway	81.5325
1	1. Metabolism	1.1 Carbohydrate Metabolism	Glyoxylate and dicarboxylate metabolism	502.358	502.358	1	0	0	858.133	858.133	648.941	648.941																																				ABC transporters	81.3004
1	1. Metabolism	1.1 Carbohydrate Metabolism	Propanoate metabolism	247.564	236.483	1	16.6224	-16.6224	430.072	430.072	295.998	295.998																																				NOD-like receptor signaling pathway	80.7167
1	1. Metabolism	1.1 Carbohydrate Metabolism	Butanoate metabolism	46.3867	46.3867	1	0	0	123.829	123.829	15.331	15.331																																				Primary immunodeficiency	79.3682
1	1. Metabolism	1.8 Metabolism of Cofactors and Vitamins	One carbon pool by folate	52.7861	52.7861	1	158.358	158.358	0	0	0	0																																				Bacterial invasion of epithelial cells	79.2554
1	1. Metabolism	1.8 Metabolism of Cofactors and Vitamins	Thiamine metabolism																																													Dilated cardiomyopathy (DCM)	78.8718
1	1. Metabolism	1.8 Metabolism of Cofactors and Vitamins	Riboflavin metabolism																																													Allograft rejection	78.8302
1	1. Metabolism	1.8 Metabolism of Cofactors and Vitamins	Vitamin B6 metabolism	103.633	-50.1503	1	193.984	-33.5347	116.916	-116.916	0	0																																				Focal adhesion	78.7586
1	1. Metabolism	1.8 Metabolism of Cofactors and Vitamins	Nicotinate and nicotinamide metabolism	75.0006	53.1763	1	132.178	132.178	92.8234	27.3503	0	0																																				Fc epsilon RI signaling pathway	78.6812
1	1. Metabolism	1.8 Metabolism of Cofactors and Vitamins	Pantothenate and CoA biosynthesis	20.6249	20.6249	1	0	0	61.8746	61.8746	0	0																																				Gap junction	78.2741
1	1. Metabolism	1.8 Metabolism of Cofactors and Vitamins	Biotin metabolism																																													Fat digestion and absorption	78.2522
1	1. Metabolism	1.8 Metabolism of Cofactors and Vitamins	Lipoic acid metabolism																																													Gastric acid secretion	77.8374
1	1. Metabolism	1.8 Metabolism of Cofactors and Vitamins	Folate biosynthesis	77.5131	40.1741	1	56.0085	-56.0085	176.531	176.531	0	0																																				Osteoclast differentiation	77.472
1	1. Metabolism	1.8 Metabolism of Cofactors and Vitamins	Retinol metabolism	12.6985	-3.3145	1	24.0195	-24.0195	14.076	14.076	0	0																																				Circadian rhythm - mammal	76.1432
1	1. Metabolism	1.8 Metabolism of Cofactors and Vitamins	Porphyrin and chlorophyll metabolism																																													Chemokine signaling pathway	76.1083
1	1. Metabolism	1.9 Metabolism of Terpenoids and Polyketides	Terpenoid backbone biosynthesis	9.49059	9.49059	1	0	0	0	0	28.4718	28.4718																																				Maturity onset diabetes of the young	75.6767
1	1. Metabolism	1.2 Energy Metabolism	Nitrogen metabolism	49.055	49.055	1	0	0	147.165	147.165	0	0																																				Glycerophospholipid metabolism	74.4138
1	1. Metabolism	1.2 Energy Metabolism	Sulfur metabolism																																													Cysteine and methionine metabolism	72.3756
1	2. Genetic Information Processing	2.2 Translation	Aminoacyl-tRNA biosynthesis																																													Nicotinate and nicotinamide metabolism	72.116
1	1. Metabolism	1.11 Xenobiotics Biodegradation and Metabolism	Metabolism of xenobiotics by cytochrome P450	6.5421	6.5421	1	0	0	19.6263	19.6263	0	0																																				B cell receptor signaling pathway	70.8912
1	1. Metabolism	1.11 Xenobiotics Biodegradation and Metabolism	Drug metabolism - cytochrome P450	14.8261	3.91395	1	11.2315	11.2315	33.2469	0.510368	0	0																																				Endometrial cancer	70.8882
1	1. Metabolism	1.11 Xenobiotics Biodegradation and Metabolism	Drug metabolism - other enzymes	65.382	4.38142	1	91.5009	-91.5009	104.645	104.645	0	0																																				Long-term potentiation	69.9939
1	1. Metabolism	1.3 Lipid Metabolism	Biosynthesis of unsaturated fatty acids	60.5573	7.09565	1	80.1925	-80.1925	101.479	101.479	0	0																																				Wnt signaling pathway	68.7036
1	1. Metabolism	0.1 Metabolic pathways	Metabolic pathways	44.961	11.6858	1	28.1214	-10.5531	77.5714	40.871	29.1901	4.73958																																				Asthma	68.0006
1	3. Environmental Information Processing	3.1 Membrane Transport	ABC transporters	60.8713	35.0749	1	16.5794	-16.5794	145.988	101.758	20.0464	20.0464																																				Hematopoietic cell lineage	66.9037
1	2. Genetic Information Processing	2.2 Translation	Ribosome biogenesis in eukaryotes																																													Prostate cancer	66.7604
1	2. Genetic Information Processing	2.2 Translation	Ribosome	153.218	121.903	1	46.9729	-46.9729	398.782	398.782	13.9003	13.9003																																				Insulin signaling pathway	66.0193
1	2. Genetic Information Processing	2.2 Translation	RNA transport	4.26537	0.236253	1	0	0	12.7961	0.708758	0	0																																				MAPK signaling pathway	65.3224
1	2. Genetic Information Processing	2.2 Translation	mRNA surveillance pathway	37.2366	37.2366	1	13.7316	13.7316	84.389	84.389	13.5892	13.5892																																				T cell receptor signaling pathway	64.4748
1	2. Genetic Information Processing	2.3 Folding, Sorting and Degradation	RNA degradation	46.3479	-19.9406	1	39.611	39.611	0	0	99.4328	-99.4328																																				Autoimmune thyroid disease	62.3309
1	2. Genetic Information Processing	2.1 Transcription	RNA polymerase																																													alpha-Linolenic acid metabolism	61.9628
1	2. Genetic Information Processing	2.1 Transcription	Basal transcription factors	107.483	-107.483	1	0	0	248.114	-248.114	74.336	-74.336																																				Non-small cell lung cancer	61.9605
1	2. Genetic Information Processing	2.4 Replication and Repair	DNA replication																																													Drug metabolism - other enzymes	61.8479
1	2. Genetic Information Processing	2.1 Transcription	Spliceosome	10.215	10.215	1	30.6449	30.6449	0	0	0	0																																				Pancreatic secretion	60.3658
1	2. Genetic Information Processing	2.3 Folding, Sorting and Degradation	Proteasome	13.1196	13.1196	1	39.3587	39.3587	0	0	0	0																																				Peroxisome	60.1375
1	2. Genetic Information Processing	2.3 Folding, Sorting and Degradation	Protein export	84.3102	84.3102	1	0	0	160.881	160.881	92.0497	92.0497																																				Graft-versus-host disease	59.9446
1	5. Organismal Systems	5.2 Endocrine System	PPAR signaling pathway	139.579	49.0076	1	106.986	-106.986	301.851	244.109	9.8996	9.8996																																				Alanine, aspartate and glutamate metabolism	59.8572
1	2. Genetic Information Processing	2.4 Replication and Repair	Base excision repair	96.5518	18.8704	1	173.133	173.133	116.522	-116.522	0	0																																				Acute myeloid leukemia	59.524
1	2. Genetic Information Processing	2.4 Replication and Repair	Nucleotide excision repair																																													Hedgehog signaling pathway	59.092
1	2. Genetic Information Processing	2.4 Replication and Repair	Mismatch repair																																													Tuberculosis	58.1253
1	2. Genetic Information Processing	2.4 Replication and Repair	Homologous recombination																																													Biosynthesis of unsaturated fatty acids	57.6736
1	2. Genetic Information Processing	2.4 Replication and Repair	Non-homologous end-joining																																													Hypertrophic cardiomyopathy (HCM)	57.4851
1	3. Environmental Information Processing	3.2 Signal Transduction	MAPK signaling pathway	53.8983	-22.9603	1	26.1953	26.1953	112.893	-72.4693	22.6068	-22.6068																																				Vitamin digestion and absorption	57.0678
1	3. Environmental Information Processing	3.2 Signal Transduction	ErbB signaling pathway	44.3931	-19.7947	1	0	0	126.424	-52.6288	6.75523	-6.75523																																				Hepatitis C	56.9711
1	3. Environmental Information Processing	3.2 Signal Transduction	Calcium signaling pathway	58.1535	-21.5164	1	5.1162	-5.1162	139.082	-66.662	30.2624	7.22885																																				RNA degradation	56.9566
1	3. Environmental Information Processing	3.3 Signaling Molecules and Interaction	Cytokine-cytokine receptor interaction	57.0301	-22.4911	1	41.1884	27.5568	102.35	-67.4786	27.5515	-27.5515																																				Cytokine-cytokine receptor interaction	56.4804
1	5. Organismal Systems	5.1 Immune System	Chemokine signaling pathway	54.6674	-19.1246	1	5.09421	5.09421	152.846	-63.7179	6.0617	1.25003																																				Non-homologous end-joining	56.3343
1	3. Environmental Information Processing	3.2 Signal Transduction	Phosphatidylinositol signaling system	25.8294	-25.8294	1	0	0	77.4882	-77.4882	0	0																																				Apoptosis	56.1728
1	3. Environmental Information Processing	3.3 Signaling Molecules and Interaction	Neuroactive ligand-receptor interaction	17.8414	14.7887	1	0	0	41.0526	31.8946	12.4716	12.4716																																				Natural killer cell mediated cytotoxicity	56.0449
1	4. Cellular Processes	4.3 Cell Growth and Death	Cell cycle	14.5307	10.079	1	0	0	25.7264	12.3711	17.8658	17.8658																																				Aldosterone-regulated sodium reabsorption	55.6298
1	4. Cellular Processes	4.3 Cell Growth and Death	Oocyte meiosis	61.748	-34.8166	1	0	0	144.291	-102.6	40.9528	-1.85023																																				Progesterone-mediated oocyte maturation	55.515
1	4. Cellular Processes	4.3 Cell Growth and Death	p53 signaling pathway	4.30335	4.30335	1	0	0	12.9101	12.9101	0	0																																				Oocyte meiosis	55.4685
1	2. Genetic Information Processing	2.3 Folding, Sorting and Degradation	Ubiquitin mediated proteolysis	114.55	-19.4772	1	51.6037	51.6037	224.149	-88.2244	67.8964	-21.811																																				Ether lipid metabolism	55.1923
1	2. Genetic Information Processing	2.3 Folding, Sorting and Degradation	Sulfur relay system	91.6063	47.4784	1	66.1919	-66.1919	208.627	208.627	0	0																																				Type II diabetes mellitus	55.151
1	2. Genetic Information Processing	2.3 Folding, Sorting and Degradation	SNARE interactions in vesicular transport	123.846	123.846	1	0	0	341.047	341.047	30.4898	30.4898																																				Toxoplasmosis	54.0661
1	4. Cellular Processes	4.1 Transport and Catabolism	Regulation of autophagy	24.4541	24.4541	1	52.3725	52.3725	20.9899	20.9899	0	0																																				Calcium signaling pathway	53.858
1	2. Genetic Information Processing	2.3 Folding, Sorting and Degradation	Protein processing in endoplasmic reticulum	18.2476	18.2476	1	0	0	43.6496	43.6496	11.0932	11.0932																																				Regulation of actin cytoskeleton	52.9461
1	4. Cellular Processes	4.1 Transport and Catabolism	Lysosome	37.3731	-37.3731	1	0	0	83.287	-83.287	28.8324	-28.8324																																				Measles	52.8662
1	4. Cellular Processes	4.1 Transport and Catabolism	Endocytosis	60.208	2.2722	1	0	0	120.785	14.767	59.8389	-7.95038																																				One carbon pool by folate	52.7861
1	4. Cellular Processes	4.1 Transport and Catabolism	Phagosome	96.28	-9.25293	1	14.1293	-14.1293	226.647	19.2973	48.0636	-32.9268																																				Jak-STAT signaling pathway	52.7567
1	4. Cellular Processes	4.1 Transport and Catabolism	Peroxisome	63.4327	4.97411	1	40.0693	-40.0693	150.229	54.9916	0	0																																				Amyotrophic lateral sclerosis (ALS)	52.4937
1	3. Environmental Information Processing	3.2 Signal Transduction	mTOR signaling pathway	13.3135	-13.3135	1	27.2773	-27.2773	12.6633	-12.6633	0	0																																				Purine metabolism	52.1174
1	4. Cellular Processes	4.3 Cell Growth and Death	Apoptosis	50.8855	9.05088	1	96.5008	65.1984	56.1558	-38.0458	0	0																																				Vascular smooth muscle contraction	51.8893
1	5. Organismal Systems	5.3 Circulatory System	Cardiac muscle contraction	13.0552	4.93172	1	0	0	33.0989	8.72843	6.06673	6.06673																																				Basal cell carcinoma	51.796
1	5. Organismal Systems	5.3 Circulatory System	Vascular smooth muscle contraction	47.5426	-11.1779	1	30.9763	30.9763	105.17	-70.9917	6.48164	6.48164																																				Chronic myeloid leukemia	51.1562
1	3. Environmental Information Processing	3.2 Signal Transduction	Wnt signaling pathway	69.3964	-32.6053	1	0	0	162.257	-68.6055	45.9324	-29.2104																																				Renal cell carcinoma	50.7684
1	5. Organismal Systems	5.8 Development	Dorso-ventral axis formation																																													Glycolysis / Gluconeogenesis	50.399
1	3. Environmental Information Processing	3.2 Signal Transduction	Notch signaling pathway																																													Antigen processing and presentation	49.6178
1	3. Environmental Information Processing	3.2 Signal Transduction	Hedgehog signaling pathway	54.7131	54.7131	1	0	0	115.872	115.872	48.2672	48.2672																																				Pyruvate metabolism	47.3608
1	3. Environmental Information Processing	3.2 Signal Transduction	TGF-beta signaling pathway	14.692	14.692	1	0	0	44.076	44.076	0	0																																				Linoleic acid metabolism	47.0062
1	5. Organismal Systems	5.8 Development	Axon guidance	54.2174	-35.6945	1	11.1032	-11.1032	101.357	-45.7883	50.1919	-50.1919																																				RIG-I-like receptor signaling pathway	46.9326
1	3. Environmental Information Processing	3.2 Signal Transduction	VEGF signaling pathway	11.8861	-2.18332	1	0	0	35.6582	-6.54997	0	0																																				Type I diabetes mellitus	46.1112
1	5. Organismal Systems	5.8 Development	Osteoclast differentiation	75.7881	0.640271	1	57.9541	57.9541	164.807	-51.4302	4.60312	-4.60312																																				Neurotrophin signaling pathway	45.6456
1	4. Cellular Processes	4.4 Cell Communication	Focal adhesion	51.3936	-51.3936	1	33.3159	-33.3159	73.9178	-73.9178	46.9472	-46.9472																																				Metabolic pathways	45.5249
1	3. Environmental Information Processing	3.3 Signaling Molecules and Interaction	ECM-receptor interaction	89.2031	-38.8777	1	54.4242	-54.4242	122.878	11.3967	90.3071	-73.6055																																				Arrhythmogenic right ventricular cardiomyopathy (ARVC)	44.7074
1	3. Environmental Information Processing	3.3 Signaling Molecules and Interaction	Cell adhesion molecules (CAMs)	128.541	-60.1968	1	13.1327	-0.0165389	317.014	-145.181	55.4753	-35.3933																																				Butanoate metabolism	43.0734
1	4. Cellular Processes	4.4 Cell Communication	Adherens junction	42.8978	-12.2045	1	0	0	122.078	-29.9978	6.61569	-6.61569																																				Carbohydrate digestion and absorption	42.9662
1	4. Cellular Processes	4.4 Cell Communication	Tight junction	88.9337	84.1326	1	0	0	179.487	165.084	87.3141	87.3141																																				Adherens junction	42.2059
1	4. Cellular Processes	4.4 Cell Communication	Gap junction	57.3811	-53.0702	1	0	0	148.968	-136.035	23.1757	-23.1757																																				Adipocytokine signaling pathway	41.0338
1	5. Organismal Systems	5.1 Immune System	Complement and coagulation cascades	295.881	-62.7144	1	55.954	-55.954	639.62	-52.6459	192.07	-79.5434																																				Chagas disease	39.6578
1	5. Organismal Systems	5.1 Immune System	Antigen processing and presentation	46.3847	-46.3847	1	0	0	139.154	-139.154	0	0																																				Phenylalanine metabolism	39.1478
1	5. Organismal Systems	5.2 Endocrine System	Renin-angiotensin system	11.7971	-11.7971	1	0	0	35.3914	-35.3914	0	0																																				Pathways in cancer (overview)	39.0141
1	5. Organismal Systems	5.1 Immune System	Toll-like receptor signaling pathway	85.4232	-51.4613	1	40.2824	14.6341	202.653	-170.92	13.3342	1.90229																																				Lysosome	37.0564
1	5. Organismal Systems	5.1 Immune System	NOD-like receptor signaling pathway	74.8627	5.13815	1	0	0	155.73	-53.4434	68.8578	68.8578																																				Phosphatidylinositol signaling system	36.7136
1	5. Organismal Systems	5.1 Immune System	RIG-I-like receptor signaling pathway	47.9418	-31.4642	1	0	0	143.825	-94.3925	0	0																																				Melanoma	36.5927
1	5. Organismal Systems	5.1 Immune System	Cytosolic DNA-sensing pathway	26.8971	-26.8971	1	0	0	80.6914	-80.6914	0	0																																				Rheumatoid arthritis	36.0265
1	3. Environmental Information Processing	3.2 Signal Transduction	Jak-STAT signaling pathway	31.7828	-7.20573	1	15.1067	-4.70181	74.7076	-22.4494	5.53399	5.53399																																				Tyrosine metabolism	35.406
1	5. Organismal Systems	5.1 Immune System	Hematopoietic cell lineage	73.9743	-3.93974	1	89.6665	78.5411	132.256	-90.3604	0	0																																				Bladder cancer	35.1096
1	5. Organismal Systems	5.1 Immune System	Natural killer cell mediated cytotoxicity	30.66	-6.82951	1	0	0	91.9801	-20.4885	0	0																																				Glycine, serine and threonine metabolism	33.5126
1	5. Organismal Systems	5.1 Immune System	T cell receptor signaling pathway	35.9548	-29.4863	1	0	0	102.765	-83.3593	5.09953	-5.09953																																				VEGF signaling pathway	32.4658
1	5. Organismal Systems	5.1 Immune System	B cell receptor signaling pathway	26.1815	15.1228	1	0	0	70.8953	53.0177	7.6493	-7.6493																																				mRNA surveillance pathway	31.853
1	5. Organismal Systems	5.1 Immune System	Fc epsilon RI signaling pathway	28.3491	22.301	1	0	0	85.0474	66.9031	0	0																																				Citrate cycle (TCA cycle)	31.753
1	5. Organismal Systems	5.1 Immune System	Fc gamma R-mediated phagocytosis	86.3743	-38.4668	1	0	0	194.543	-50.8201	64.5801	-64.5801																																				Long-term depression	30.5712
1	5. Organismal Systems	5.1 Immune System	Leukocyte transendothelial migration	79.5036	-62.009	1	0	0	205.474	-152.99	33.0365	-33.0365																																				Tryptophan metabolism	29.0725
1	5. Organismal Systems	5.1 Immune System	Intestinal immune network for IgA production	87.656	-30.5603	1	17.7366	17.7366	235.827	-100.013	9.40462	-9.40462																																				Spliceosome	29.0227
1	5. Organismal Systems	5.9 Environmental Adaptation	Circadian rhythm - mammal	90.6467	18.6289	1	0	0	50.158	50.158	221.782	5.72884																																				p53 signaling pathway	28.661
1	5. Organismal Systems	5.6 Nervous System	Long-term potentiation	76.7676	-76.7676	1	51.9602	-51.9602	178.342	-178.342	0	0																																				Inositol phosphate metabolism	28.6604
1	5. Organismal Systems	5.6 Nervous System	Neurotrophin signaling pathway	20.4786	-14.8872	1	0	0	57.0278	-40.2536	4.40807	-4.40807																																				Small cell lung cancer	28.5241
1	5. Organismal Systems	5.6 Nervous System	Glutamatergic synapse	52.9624	-17.7868	1	25.7694	-25.7694	133.118	-27.5911	0	0																																				Cytosolic DNA-sensing pathway	28.3678
1	5. Organismal Systems	5.6 Nervous System	Long-term depression	17.5488	-11.9168	1	0	0	52.6463	-35.7505	0	0																																				Arginine and proline metabolism	26.9156
1	5. Organismal Systems	5.7 Sensory System	Olfactory transduction	9.02397	9.02397	1	0	0	27.0719	27.0719	0	0																																				Homologous recombination	26.1552
1	5. Organismal Systems	5.7 Sensory System	Taste transduction	98.6402	4.08075	1	31.188	31.188	264.733	-18.9457	0	0																																				Other glycan degradation	25.833
1	5. Organismal Systems	5.7 Sensory System	Phototransduction																																													Glutathione metabolism	24.8243
1	4. Cellular Processes	4.2 Cell Motility	Regulation of actin cytoskeleton	34.5265	-31.6311	1	17.0451	-17.0451	64.6329	-55.9466	21.9015	-21.9015																																				Colorectal cancer	24.4633
1	5. Organismal Systems	5.2 Endocrine System	Insulin signaling pathway	46.3312	4.78589	1	27.9313	-27.9313	108.052	39.2783	3.01066	3.01066																																				Pyrimidine metabolism	24.4376
1	5. Organismal Systems	5.2 Endocrine System	GnRH signaling pathway	65.9257	-54.313	1	0	0	191.658	-156.819	6.11944	-6.11944																																				Arachidonic acid metabolism	23.1048
1	5. Organismal Systems	5.2 Endocrine System	Progesterone-mediated oocyte maturation	49.7929	20.2615	1	0	0	124.707	36.1127	24.6718	24.6718																																				Protein processing in endoplasmic reticulum	22.0574
1	5. Organismal Systems	5.2 Endocrine System	Melanogenesis	97.6188	-53.0021	1	0	0	250.636	-155.658	42.2204	-3.34845																																				Regulation of autophagy	21.0811
1	5. Organismal Systems	5.2 Endocrine System	Adipocytokine signaling pathway	33.893	3.94668	1	34.8591	5.42746	61.0496	0.642367	5.77022	5.77022																																				mTOR signaling pathway	20.7129
1	6. Human Diseases	6.5 Metabolic Diseases	Type II diabetes mellitus	45.5488	10.6024	1	37.5943	-37.5943	90.0201	60.3696	9.03197	9.03197																																				RNA transport	20.5001
1	6. Human Diseases	6.5 Metabolic Diseases	Type I diabetes mellitus	43.8619	-31.1723	1	19.0344	19.0344	112.551	-112.551	0	0																																				Glycosaminoglycan degradation	19.6823
1	6. Human Diseases	6.5 Metabolic Diseases	Maturity onset diabetes of the young	79.2804	30.3482	1	73.3983	-73.3983	146.809	146.809	17.6339	17.6339																																				Pantothenate and CoA biosynthesis	19.3358
1	5. Organismal Systems	5.5 Excretory System	Aldosterone-regulated sodium reabsorption	40.3653	-25.1516	1	22.8205	22.8205	98.2753	-98.2753	0	0																																				Alzheimer's disease	19.3032
1	5. Organismal Systems	5.5 Excretory System	Endocrine and other factor-regulated calcium reabsorption	104.831	-87.7334	1	16.715	-16.715	176.306	-125.013	121.472	-121.472																																				Fatty acid metabolism	19.202
1	5. Organismal Systems	5.5 Excretory System	Vasopressin-regulated water reabsorption	126.915	50.3071	1	23.6066	-23.6066	288.637	106.025	68.5023	68.5023																																				Glycosphingolipid biosynthesis - lacto and neolacto series	18.2691
1	5. Organismal Systems	5.5 Excretory System	Proximal tubule bicarbonate reclamation	178.247	-67.8056	1	116.923	-116.923	417.817	-86.4938	0	0																																				Pentose and glucuronate interconversions	17.8514
1	5. Organismal Systems	5.5 Excretory System	Collecting duct acid secretion																																													Ribosome biogenesis in eukaryotes	17.7948
1	5. Organismal Systems	5.4 Digestive System	Salivary secretion	131.305	-35.0728	1	50.5689	-50.5689	330.363	-41.6659	12.9835	-12.9835																																				Pentose phosphate pathway	16.5396
1	5. Organismal Systems	5.4 Digestive System	Gastric acid secretion	80.0936	-75.033	1	11.7276	-11.7276	228.553	-213.371	0	0																																				Neuroactive ligand-receptor interaction	16.4949
1	5. Organismal Systems	5.4 Digestive System	Pancreatic secretion	52.7652	-39.9951	1	9.26601	-9.26601	149.03	-110.719	0	0																																				Pancreatic cancer	15.3952
1	5. Organismal Systems	5.4 Digestive System	Carbohydrate digestion and absorption	33.8666	6.88679	1	0	0	101.6	20.6604	0	0																																				O-Mannosyl glycan biosynthesis	14.3938
1	5. Organismal Systems	5.4 Digestive System	Protein digestion and absorption	93.0636	-16.4651	1	46.908	-46.908	169.528	60.2681	62.7553	-62.7553																																				Fructose and mannose metabolism	14.3776
1	5. Organismal Systems	5.4 Digestive System	Fat digestion and absorption	51.5067	-1.03673	1	58.9115	-58.9115	95.6087	55.8013	0	0																																				Drug metabolism - cytochrome P450	13.7279
1	5. Organismal Systems	5.4 Digestive System	Bile secretion	94.4641	-34.2198	1	9.04333	-9.04333	268.666	-99.2989	5.68279	5.68279																																				Huntington's disease	13.4528
1	5. Organismal Systems	5.4 Digestive System	Vitamin digestion and absorption	59.7853	-59.7853	1	179.356	-179.356	0	0	0	0																																				Cell cycle	13.2722
1	5. Organismal Systems	5.4 Digestive System	Mineral absorption	88.8206	-49.7418	1	17.1227	-17.1227	210.787	-93.5504	38.5523	-38.5523																																				TGF-beta signaling pathway	12.9003
1	6. Human Diseases	6.3 Neurodegenerative Diseases	Alzheimer's disease	21.2704	4.50147	1	13.0935	-13.0935	46.43	22.3102	4.28773	4.28773																																				Proteasome	12.264
1	6. Human Diseases	6.3 Neurodegenerative Diseases	Parkinson's disease	7.35606	-1.77958	1	0	0	22.0682	-5.33874	0	0																																				Retinol metabolism	12.1213
1	6. Human Diseases	6.3 Neurodegenerative Diseases	Amyotrophic lateral sclerosis (ALS)	6.59787	6.59787	1	0	0	19.7936	19.7936	0	0																																				Cardiac muscle contraction	11.5842
1	6. Human Diseases	6.3 Neurodegenerative Diseases	Huntington's disease	14.7902	5.40352	1	0	0	34.1412	5.98111	10.2295	10.2295																																				Renin-angiotensin system	10.4863
1	6. Human Diseases	6.3 Neurodegenerative Diseases	Prion diseases	349.219	114.515	1	120.651	-120.651	819.947	416.821	107.061	47.3741																																				Lysine degradation	9.8633
1	6. Human Diseases	6.6 Infectious Diseases	Bacterial invasion of epithelial cells	61.8936	-16.7314	1	0	0	52.4045	7.31347	133.276	-57.5076																																				Terpenoid backbone biosynthesis	9.49059
1	6. Human Diseases	6.6 Infectious Diseases	Leishmaniasis	79.6939	-58.5046	1	0	0	231.432	-167.865	7.6493	-7.6493																																				Thyroid cancer	9.22147
1	6. Human Diseases	6.6 Infectious Diseases	Chagas disease	35.4119	8.59204	1	0	0	91.957	21.5004	14.2787	4.27575																																				Notch signaling pathway	6.77595
1	6. Human Diseases	6.6 Infectious Diseases	African trypanosomiasis	189.374	-189.374	1	0	0	490.572	-490.572	77.5507	-77.5507																																				Parkinson's disease	6.61516
1	6. Human Diseases	6.6 Infectious Diseases	Malaria	219.166	-140.532	1	23.8417	-23.8417	559.64	-349.836	74.0159	-47.9196																																				Olfactory transduction	6.23356
1	6. Human Diseases	6.6 Infectious Diseases	Toxoplasmosis	34.1853	-22.8779	1	0	0	93.8903	-70.9723	8.66558	2.33857																																				Metabolism of xenobiotics by cytochrome P450	5.98533
1	6. Human Diseases	6.6 Infectious Diseases	Amoebiasis	121.847	16.3931	1	113.698	21.3289	202.509	57.9913	49.3344	-30.1407																																				Steroid hormone biosynthesis	5.48329
1	6. Human Diseases	6.6 Infectious Diseases	Staphylococcus aureus infection	316.509	-223.943	1	0	0	717.603	-487.961	231.923	-183.867																																				beta-Alanine metabolism	5.16789
1	6. Human Diseases	6.6 Infectious Diseases	Tuberculosis	57.5558	-33.1089	1	4.38769	-4.38769	138.511	-65.1699	29.769	-29.769																																				Oxidative phosphorylation	3.49487
1	6. Human Diseases	6.6 Infectious Diseases	Hepatitis C	38.041	1.43642	1	0	0	106.083	-3.73099	8.04025	8.04025																																				Ascorbate and aldarate metabolism
1	6. Human Diseases	6.6 Infectious Diseases	Measles	43.9761	-40.0838	1	0	0	131.928	-120.251	0	0																																				Fatty acid elongation in mitochondria
1	6. Human Diseases	6.1 Cancers	Pathways in cancer (overview)	30.3233	-19.6185	1	1.17417	-1.17417	67.4338	-37.845	22.3621	-19.8364																																				Primary bile acid biosynthesis
1	6. Human Diseases	6.1 Cancers	Colorectal cancer	17.7928	-17.7928	1	0	0	45.122	-45.122	8.25639	-8.25639																																				Ubiquinone and other terpenoid-quinone biosynthesis
1	6. Human Diseases	6.1 Cancers	Renal cell carcinoma	11.2321	-0.704317	1	0	0	19.4864	0.190037	14.2098	-2.30299																																				Valine, leucine and isoleucine biosynthesis
1	6. Human Diseases	6.1 Cancers	Pancreatic cancer	10.1267	-10.1267	1	0	0	30.3801	-30.3801	0	0																																				Lysine biosynthesis
1	6. Human Diseases	6.1 Cancers	Endometrial cancer	19.338	-19.338	1	0	0	58.014	-58.014	0	0																																				Histidine metabolism
1	6. Human Diseases	6.1 Cancers	Glioma	60.4829	-60.4829	1	0	0	149.631	-149.631	31.8175	-31.8175																																				Selenoamino acid metabolism
1	6. Human Diseases	6.1 Cancers	Prostate cancer	39.3744	-6.68992	1	0	0	69.2453	-14.383	48.8778	-5.68673																																				Cyanoamino acid metabolism
1	6. Human Diseases	6.1 Cancers	Thyroid cancer	9.22147	-9.22147	1	0	0	27.6644	-27.6644	0	0																																				D-Glutamine and D-glutamate metabolism
1	6. Human Diseases	6.1 Cancers	Basal cell carcinoma	53.9101	-30.4018	1	0	0	119.881	-49.3564	41.8489	-41.8489																																				D-Arginine and D-ornithine metabolism
1	6. Human Diseases	6.1 Cancers	Melanoma	31.715	-31.715	1	0	0	62.6469	-62.6469	32.498	-32.498																																				Glycosaminoglycan biosynthesis - chondroitin sulfate
1	6. Human Diseases	6.1 Cancers	Bladder cancer	36.0585	-36.0585	1	0	0	108.175	-108.175	0	0																																				Glycosaminoglycan biosynthesis - heparan sulfate
1	6. Human Diseases	6.1 Cancers	Chronic myeloid leukemia	16.055	2.69705	1	0	0	48.1649	8.09115	0	0																																				Glycosylphosphatidylinositol(GPI)-anchor biosynthesis
1	6. Human Diseases	6.1 Cancers	Acute myeloid leukemia	14.7204	-14.7204	1	0	0	44.1612	-44.1612	0	0																																				Sphingolipid metabolism
1	6. Human Diseases	6.1 Cancers	Small cell lung cancer	16.8251	-16.8251	1	4.30528	-4.30528	27.6509	-27.6509	18.5192	-18.5192																																				Thiamine metabolism
1	6. Human Diseases	6.1 Cancers	Non-small cell lung cancer	15.417	-15.417	1	0	0	46.2511	-46.2511	0	0																																				Riboflavin metabolism
1	6. Human Diseases	6.2 Immune System Diseases	Asthma	68.0006	-68.0006	1	0	0	204.002	-204.002	0	0																																				Biotin metabolism
1	6. Human Diseases	6.2 Immune System Diseases	Autoimmune thyroid disease	65.3714	-52.6818	1	19.0344	19.0344	177.08	-177.08	0	0																																				Lipoic acid metabolism
1	6. Human Diseases	6.2 Immune System Diseases	Systemic lupus erythematosus	213.941	-89.5194	1	42.193	-28.0038	480.78	-166.63	118.851	-73.9246																																				Porphyrin and chlorophyll metabolism
1	6. Human Diseases	6.2 Immune System Diseases	Rheumatoid arthritis	35.6217	-6.98043	1	8.76865	8.76865	80.5119	-26.2558	17.5847	-3.45417																																				Sulfur metabolism
1	6. Human Diseases	6.2 Immune System Diseases	Allograft rejection	74.4508	-59.9987	1	21.6781	21.6781	201.674	-201.674	0	0																																				Aminoacyl-tRNA biosynthesis
1	6. Human Diseases	6.2 Immune System Diseases	Graft-versus-host disease	56.1981	-39.9395	1	24.3878	24.3878	144.206	-144.206	0	0																																				RNA polymerase
1	6. Human Diseases	6.2 Immune System Diseases	Primary immunodeficiency	75.2918	-60.9711	1	21.4811	21.4811	204.394	-204.394	0	0																																				DNA replication
1	6. Human Diseases	6.4 Cardiovascular Diseases	Hypertrophic cardiomyopathy (HCM)	40.8676	6.51751	1	18.7045	18.7045	87.5149	6.31141	16.3834	-5.46333																																				Nucleotide excision repair
1	6. Human Diseases	6.4 Cardiovascular Diseases	Arrhythmogenic right ventricular cardiomyopathy (ARVC)	32.5133	-5.65345	1	0	0	85.4029	-4.82327	12.1371	-12.1371																																				Mismatch repair
1	6. Human Diseases	6.4 Cardiovascular Diseases	Dilated cardiomyopathy (DCM)	62.9123	-27.4833	1	0	0	173.647	-77.4179	15.09	-5.03202																																				Phototransduction
1	6. Human Diseases	6.4 Cardiovascular Diseases	Viral myocarditis	96.5178	-4.26284	1	12.5873	12.5873	253.173	-49.169	23.7932	23.7932																																				Collecting duct acid secretion
#N/A	#N/A	#N/A	#N/A																																													#N/A
#N/A	#N/A	#N/A	#N/A																																													#N/A
#N/A	#N/A	#N/A	#N/A																																													#N/A
#N/A	#N/A	#N/A	#N/A																																													#N/A
#N/A	#N/A	#N/A	#N/A																																													#N/A
#N/A	#N/A	#N/A	#N/A																																													#N/A
#N/A	#N/A	#N/A	#N/A																																													#N/A
#N/A	#N/A	#N/A	#N/A																																													#N/A
#N/A	#N/A	#N/A	#N/A																																													#N/A
#N/A	#N/A	#N/A	#N/A																																													#N/A
#N/A	#N/A	#N/A	#N/A																																													#N/A
#N/A	#N/A	#N/A	#N/A																																													#N/A
#N/A	#N/A	#N/A	#N/A																																													#N/A
#N/A	#N/A	#N/A	#N/A																																													#N/A
#N/A	#N/A	#N/A	#N/A																																													#N/A
#N/A	#N/A	#N/A	#N/A																																													#N/A
#N/A	#N/A	#N/A	#N/A																																													#N/A
#N/A	#N/A	#N/A	#N/A																																													#N/A
#N/A	#N/A	#N/A	#N/A																																													#N/A
#N/A	#N/A	#N/A	#N/A																																													#N/A
#N/A	#N/A	#N/A	#N/A																																													#N/A
#N/A	#N/A	#N/A	#N/A																																													#N/A
#N/A	#N/A	#N/A	#N/A																																													#N/A
#N/A	#N/A	#N/A	#N/A																																													#N/A
#N/A	#N/A	#N/A	#N/A																																													#N/A
#N/A	#N/A	#N/A	#N/A																																													#N/A
#N/A	#N/A	#N/A	#N/A																																													#N/A
#N/A	#N/A	#N/A	#N/A																																													#N/A
#N/A	#N/A	#N/A	#N/A																																													#N/A
#N/A	#N/A	#N/A	#N/A																																													#N/A
#N/A	#N/A	#N/A	#N/A																																													#N/A
#N/A	#N/A	#N/A	#N/A																																													#N/A
#N/A	#N/A	#N/A	#N/A																																													#N/A
#N/A	#N/A	#N/A	#N/A																																													#N/A
#N/A	#N/A	#N/A	#N/A																																													#N/A
#N/A	#N/A	#N/A	#N/A																																													#N/A
#N/A	#N/A	#N/A	#N/A																																													#N/A
#N/A	#N/A	#N/A	#N/A																																													#N/A
#N/A	#N/A	#N/A	#N/A																																													#N/A
#N/A	#N/A	#N/A	#N/A																																													#N/A
#N/A	#N/A	#N/A	#N/A																																													#N/A
#N/A	#N/A	#N/A	#N/A																																													#N/A
#N/A	#N/A	#N/A	#N/A																																													#N/A
#N/A	#N/A	#N/A	#N/A																																													#N/A
#N/A	#N/A	#N/A	#N/A																																													#N/A
#N/A	#N/A	#N/A	#N/A																																													#N/A
#N/A	#N/A	#N/A	#N/A																																													#N/A
#N/A	#N/A	#N/A	#N/A																																													#N/A
#N/A	#N/A	#N/A	#N/A																																													#N/A
#N/A	#N/A	#N/A	#N/A																																													#N/A
#N/A	#N/A	#N/A	#N/A																																													#N/A
#N/A	#N/A	#N/A	#N/A																																													#N/A
#N/A	#N/A	#N/A	#N/A																																													#N/A
#N/A	#N/A	#N/A	#N/A																																													#N/A
#N/A	#N/A	#N/A	#N/A																																													#N/A
#N/A	#N/A	#N/A	#N/A																																													#N/A
#N/A	#N/A	#N/A	#N/A																																													#N/A
#N/A	#N/A	#N/A	#N/A																																													#N/A
#N/A	#N/A	#N/A	#N/A																																													#N/A
#N/A	#N/A	#N/A	#N/A																																													#N/A
#N/A	#N/A	#N/A	#N/A																																													#N/A
#N/A	#N/A	#N/A	#N/A																																													#N/A
#N/A	#N/A	#N/A	#N/A																																													#N/A
#N/A	#N/A	#N/A	#N/A																																													#N/A
#N/A	#N/A	#N/A	#N/A																																													#N/A
#N/A	#N/A	#N/A	#N/A	#REF!	#REF!	#REF!	#REF!	#REF!	#REF!	#REF!	#REF!	#REF!																																				#N/A
#N/A	#N/A	#N/A	#N/A	#REF!	#REF!	#REF!	#REF!	#REF!	#REF!	#REF!	#REF!	#REF!																																				#N/A
[truncated: 1 more columns]

## Sheet: Sheet(F)
200	Foldchange(310 day vs non-lacting)				Foldchange (100 day vs 310day)				Foldchange (100day vs non-lactating)				0				0				0				0				0				0				0				0				0				0
-100	Glycolysis / Gluconeogenesis	46.0405	-46.0405	1	Glycolysis / Gluconeogenesis	95.2074	95.2074	1	Glycolysis / Gluconeogenesis	23.9487	23.9487	1		0	0	1		0	0	1		0	0	1		0	0	1		0	0	1		0	0	1		0	0	1		0	0	1		0	0	1
100	Citrate cycle (TCA cycle)	31.9618	-31.9618	1	Citrate cycle (TCA cycle)	41.7536	41.7536	1	Citrate cycle (TCA cycle)	24.7189	24.7189	1		0	0	1		0	0	1		0	0	1		0	0	1		0	0	1		0	0	1		0	0	1		0	0	1		0	0	1
		0		1	Pentose phosphate pathway	29.7173	29.7173	1	Pentose phosphate pathway	17.993	17.993	1		0	0	1		0	0	1		0	0	1		0	0	1		0	0	1		0	0	1		0	0	1		0	0	1		0	0	1
	Pentose and glucuronate interconversions	62.4799	-62.4799	1		0	0	1		0	0	1		0	0	1		0	0	1		0	0	1		0	0	1		0	0	1		0	0	1		0	0	1		0	0	1		0	0	1
		0		1	Fructose and mannose metabolism	29.8614	29.8614	1	Fructose and mannose metabolism	14.6193	14.6193	1		0	0	1		0	0	1		0	0	1		0	0	1		0	0	1		0	0	1		0	0	1		0	0	1		0	0	1
	Galactose metabolism	219.088	-219.088	1	Galactose metabolism	836.048	836.048	1	Galactose metabolism	190.068	-103.713	1		0	0	1		0	0	1		0	0	1		0	0	1		0	0	1		0	0	1		0	0	1		0	0	1		0	0	1
		0		1		0	0	1		0	0	1		0	0	1		0	0	1		0	0	1		0	0	1		0	0	1		0	0	1		0	0	1		0	0	1		0	0	1
		0		1	Fatty acid biosynthesis	512.782	512.782	1		0	0	1		0	0	1		0	0	1		0	0	1		0	0	1		0	0	1		0	0	1		0	0	1		0	0	1		0	0	1
		0		1		0	0	1		0	0	1		0	0	1		0	0	1		0	0	1		0	0	1		0	0	1		0	0	1		0	0	1		0	0	1		0	0	1
		0		1	Fatty acid metabolism	47.8838	-47.8838	1	Fatty acid metabolism	9.72207	9.72207	1		0	0	1		0	0	1		0	0	1		0	0	1		0	0	1		0	0	1		0	0	1		0	0	1		0	0	1
		0		1	Synthesis and degradation of ketone bodies	357.729	357.729	1	Synthesis and degradation of ketone bodies	44.2894	44.2894	1		0	0	1		0	0	1		0	0	1		0	0	1		0	0	1		0	0	1		0	0	1		0	0	1		0	0	1
	Steroid biosynthesis	36.1742	-36.1742	1	Steroid biosynthesis	269.435	188.79	1		0	0	1		0	0	1		0	0	1		0	0	1		0	0	1		0	0	1		0	0	1		0	0	1		0	0	1		0	0	1
		0		1		0	0	1		0	0	1		0	0	1		0	0	1		0	0	1		0	0	1		0	0	1		0	0	1		0	0	1		0	0	1		0	0	1
		0		1		0	0	1		0	0	1		0	0	1		0	0	1		0	0	1		0	0	1		0	0	1		0	0	1		0	0	1		0	0	1		0	0	1
		0		1	Steroid hormone biosynthesis	17.3637	17.3637	1		0	0	1		0	0	1		0	0	1		0	0	1		0	0	1		0	0	1		0	0	1		0	0	1		0	0	1		0	0	1
		0		1	Oxidative phosphorylation	11.5578	11.5578	1		0	0	1		0	0	1		0	0	1		0	0	1		0	0	1		0	0	1		0	0	1		0	0	1		0	0	1		0	0	1
	Purine metabolism	20.5291	-20.5291	1	Purine metabolism	155.166	-108.21	1	Purine metabolism	33.6645	-33.6645	1		0	0	1		0	0	1		0	0	1		0	0	1		0	0	1		0	0	1		0	0	1		0	0	1		0	0	1
	Caffeine metabolism	640.506	-640.506	1	Caffeine metabolism	732.516	732.516	1		0	0	1		0	0	1		0	0	1		0	0	1		0	0	1		0	0	1		0	0	1		0	0	1		0	0	1		0	0	1
		0		1	Pyrimidine metabolism	70.4591	-59.519	1	Pyrimidine metabolism	4.39708	4.39708	1		0	0	1		0	0	1		0	0	1		0	0	1		0	0	1		0	0	1		0	0	1		0	0	1		0	0	1
	Alanine, aspartate and glutamate metabolism	37.6932	-37.6932	1	Alanine, aspartate and glutamate metabolism	76.9273	76.9273	1		0	0	1		0	0	1		0	0	1		0	0	1		0	0	1		0	0	1		0	0	1		0	0	1		0	0	1		0	0	1
	Glycine, serine and threonine metabolism	22.7519	-22.7519	1	Glycine, serine and threonine metabolism	71.1279	71.1279	1	Glycine, serine and threonine metabolism	12.4029	-12.4029	1		0	0	1		0	0	1		0	0	1		0	0	1		0	0	1		0	0	1		0	0	1		0	0	1		0	0	1
	Cysteine and methionine metabolism	57.9967	-57.9967	1	Cysteine and methionine metabolism	67.7991	67.7991	1	Cysteine and methionine metabolism	52.693	52.693	1		0	0	1		0	0	1		0	0	1		0	0	1		0	0	1		0	0	1		0	0	1		0	0	1		0	0	1
	Valine, leucine and isoleucine degradation	13.0598	13.0598	1	Valine, leucine and isoleucine degradation	283.216	245.15	1	Valine, leucine and isoleucine degradation	231.53	231.53	1		0	0	1		0	0	1		0	0	1		0	0	1		0	0	1		0	0	1		0	0	1		0	0	1		0	0	1
		0		1		0	0	1		0	0	1		0	0	1		0	0	1		0	0	1		0	0	1		0	0	1		0	0	1		0	0	1		0	0	1		0	0	1
		0		1		0	0	1		0	0	1		0	0	1		0	0	1		0	0	1		0	0	1		0	0	1		0	0	1		0	0	1		0	0	1		0	0	1
		0		1	Lysine degradation	22.0471	22.0471	1	Lysine degradation	8.85789	8.85789	1		0	0	1		0	0	1		0	0	1		0	0	1		0	0	1		0	0	1		0	0	1		0	0	1		0	0	1
		0		1	Arginine and proline metabolism	18.331	18.331	1	Arginine and proline metabolism	63.9687	63.9687	1		0	0	1		0	0	1		0	0	1		0	0	1		0	0	1		0	0	1		0	0	1		0	0	1		0	0	1
		0		1		0	0	1		0	0	1		0	0	1		0	0	1		0	0	1		0	0	1		0	0	1		0	0	1		0	0	1		0	0	1		0	0	1
	Tyrosine metabolism	17.5492	17.5492	1	Tyrosine metabolism	25.5754	-25.5754	1	Tyrosine metabolism	13.5657	-13.5657	1		0	0	1		0	0	1		0	0	1		0	0	1		0	0	1		0	0	1		0	0	1		0	0	1		0	0	1
		0		1		0	0	1	Phenylalanine metabolism	27.1314	-27.1314	1		0	0	1		0	0	1		0	0	1		0	0	1		0	0	1		0	0	1		0	0	1		0	0	1		0	0	1
	Tryptophan metabolism	13.3708	13.3708	1	Tryptophan metabolism	19.486	-19.486	1	Tryptophan metabolism	9.49059	9.49059	1		0	0	1		0	0	1		0	0	1		0	0	1		0	0	1		0	0	1		0	0	1		0	0	1		0	0	1
		0		1		0	0	1		0	0	1		0	0	1		0	0	1		0	0	1		0	0	1		0	0	1		0	0	1		0	0	1		0	0	1		0	0	1
		0		1		0	0	1	beta-Alanine metabolism	17.3641	-17.3641	1		0	0	1		0	0	1		0	0	1		0	0	1		0	0	1		0	0	1		0	0	1		0	0	1		0	0	1
		0		1	Taurine and hypotaurine metabolism	279.671	279.671	1	Taurine and hypotaurine metabolism	217.359	217.359	1		0	0	1		0	0	1		0	0	1		0	0	1		0	0	1		0	0	1		0	0	1		0	0	1		0	0	1
		0		1		0	0	1		0	0	1		0	0	1		0	0	1		0	0	1		0	0	1		0	0	1		0	0	1		0	0	1		0	0	1		0	0	1
		0		1		0	0	1		0	0	1		0	0	1		0	0	1		0	0	1		0	0	1		0	0	1		0	0	1		0	0	1		0	0	1		0	0	1
		0		1		0	0	1		0	0	1		0	0	1		0	0	1		0	0	1		0	0	1		0	0	1		0	0	1		0	0	1		0	0	1		0	0	1
		0		1		0	0	1		0	0	1		0	0	1		0	0	1		0	0	1		0	0	1		0	0	1		0	0	1		0	0	1		0	0	1		0	0	1
	Glutathione metabolism	8.08005	-8.08005	1	Glutathione metabolism	69.4958	45.9016	1		0	0	1		0	0	1		0	0	1		0	0	1		0	0	1		0	0	1		0	0	1		0	0	1		0	0	1		0	0	1
	Starch and sucrose metabolism	165.315	-13.3281	1	Starch and sucrose metabolism	90.6762	90.6762	1	Starch and sucrose metabolism	110.259	-88.4757	1		0	0	1		0	0	1		0	0	1		0	0	1		0	0	1		0	0	1		0	0	1		0	0	1		0	0	1
		0		1	N-Glycan biosynthesis	232.563	-126.65	1	N-Glycan biosynthesis	66.5574	-66.5574	1		0	0	1		0	0	1		0	0	1		0	0	1		0	0	1		0	0	1		0	0	1		0	0	1		0	0	1
		0		1	Other glycan degradation	48.9938	-48.9938	1	Other glycan degradation	28.5052	-28.5052	1		0	0	1		0	0	1		0	0	1		0	0	1		0	0	1		0	0	1		0	0	1		0	0	1		0	0	1
		0		1	O-Glycan biosynthesis	325.625	-325.625	1	O-Glycan biosynthesis	267.891	-267.891	1		0	0	1		0	0	1		0	0	1		0	0	1		0	0	1		0	0	1		0	0	1		0	0	1		0	0	1
		0		1	O-Mannosyl glycan biosynthesis	47.4996	47.4996	1		0	0	1		0	0	1		0	0	1		0	0	1		0	0	1		0	0	1		0	0	1		0	0	1		0	0	1		0	0	1
	Amino sugar and nucleotide sugar metabolism	111.978	-111.978	1	Amino sugar and nucleotide sugar metabolism	170.767	90.8932	1	Amino sugar and nucleotide sugar metabolism	41.6428	21.3724	1		0	0	1		0	0	1		0	0	1		0	0	1		0	0	1		0	0	1		0	0	1		0	0	1		0	0	1
	Butirosin and neomycin biosynthesis	513.788	-513.788	1	Butirosin and neomycin biosynthesis	1027.66	1027.66	1	Butirosin and neomycin biosynthesis	123.437	123.437	1		0	0	1		0	0	1		0	0	1		0	0	1		0	0	1		0	0	1		0	0	1		0	0	1		0	0	1
		0		1	Glycosaminoglycan degradation	41.258	-41.258	1	Glycosaminoglycan degradation	24.0044	-24.0044	1		0	0	1		0	0	1		0	0	1		0	0	1		0	0	1		0	0	1		0	0	1		0	0	1		0	0	1
		0		1		0	0	1		0	0	1		0	0	1		0	0	1		0	0	1		0	0	1		0	0	1		0	0	1		0	0	1		0	0	1		0	0	1
		0		1	Glycosaminoglycan biosynthesis - keratan sulfate	724.542	-534.543	1	Glycosaminoglycan biosynthesis - keratan sulfate	517.922	-517.922	1		0	0	1		0	0	1		0	0	1		0	0	1		0	0	1		0	0	1		0	0	1		0	0	1		0	0	1
		0		1		0	0	1		0	0	1		0	0	1		0	0	1		0	0	1		0	0	1		0	0	1		0	0	1		0	0	1		0	0	1		0	0	1
	Glycerolipid metabolism	135.479	-135.479	1	Glycerolipid metabolism	172.741	172.741	1	Glycerolipid metabolism	14.0244	14.0244	1		0	0	1		0	0	1		0	0	1		0	0	1		0	0	1		0	0	1		0	0	1		0	0	1		0	0	1
		0		1	Inositol phosphate metabolism	61.3071	-61.3071	1		0	0	1		0	0	1		0	0	1		0	0	1		0	0	1		0	0	1		0	0	1		0	0	1		0	0	1		0	0	1
		0		1		0	0	1		0	0	1		0	0	1		0	0	1		0	0	1		0	0	1		0	0	1		0	0	1		0	0	1		0	0	1		0	0	1
	Glycerophospholipid metabolism	70.5869	-70.5869	1	Glycerophospholipid metabolism	112.149	96.0925	1	Glycerophospholipid metabolism	7.6964	7.6964	1		0	0	1		0	0	1		0	0	1		0	0	1		0	0	1		0	0	1		0	0	1		0	0	1		0	0	1
		0		1	Ether lipid metabolism	69.5725	69.5725	1	Ether lipid metabolism	18.2789	18.2789	1		0	0	1		0	0	1		0	0	1		0	0	1		0	0	1		0	0	1		0	0	1		0	0	1		0	0	1
		0		1		0	0	1		0	0	1		0	0	1		0	0	1		0	0	1		0	0	1		0	0	1		0	0	1		0	0	1		0	0	1		0	0	1
		0		1		0	0	1		0	0	1		0	0	1		0	0	1		0	0	1		0	0	1		0	0	1		0	0	1		0	0	1		0	0	1		0	0	1
		0		1		0	0	1		0	0	1		0	0	1		0	0	1		0	0	1		0	0	1		0	0	1		0	0	1		0	0	1		0	0	1		0	0	1
		0		1		0	0	1		0	0	1		0	0	1		0	0	1		0	0	1		0	0	1		0	0	1		0	0	1		0	0	1		0	0	1		0	0	1
		0		1	Glycosphingolipid biosynthesis - lacto and neolacto series	52.7773	52.7773	1		0	0	1		0	0	1		0	0	1		0	0	1		0	0	1		0	0	1		0	0	1		0	0	1		0	0	1		0	0	1
		0		1	Glycosphingolipid biosynthesis - globo series	564.627	-564.627	1	Glycosphingolipid biosynthesis - globo series	433.761	-433.761	1		0	0	1		0	0	1		0	0	1		0	0	1		0	0	1		0	0	1		0	0	1		0	0	1		0	0	1
		0		1	Glycosphingolipid biosynthesis - ganglio series	564.627	-564.627	1	Glycosphingolipid biosynthesis - ganglio series	433.761	-433.761	1		0	0	1		0	0	1		0	0	1		0	0	1		0	0	1		0	0	1		0	0	1		0	0	1		0	0	1
	Pyruvate metabolism	28.982	-28.982	1	Pyruvate metabolism	93.6855	93.6855	1	Pyruvate metabolism	23.255	23.255	1		0	0	1		0	0	1		0	0	1		0	0	1		0	0	1		0	0	1		0	0	1		0	0	1		0	0	1
		0		1	Glyoxylate and dicarboxylate metabolism	858.133	858.133	1	Glyoxylate and dicarboxylate metabolism	648.941	648.941	1		0	0	1		0	0	1		0	0	1		0	0	1		0	0	1		0	0	1		0	0	1		0	0	1		0	0	1
	Propanoate metabolism	16.6224	-16.6224	1	Propanoate metabolism	430.072	430.072	1	Propanoate metabolism	295.998	295.998	1		0	0	1		0	0	1		0	0	1		0	0	1		0	0	1		0	0	1		0	0	1		0	0	1		0	0	1
		0		1	Butanoate metabolism	123.829	123.829	1	Butanoate metabolism	15.331	15.331	1		0	0	1		0	0	1		0	0	1		0	0	1		0	0	1		0	0	1		0	0	1		0	0	1		0	0	1
	One carbon pool by folate	158.358	158.358	1		0	0	1		0	0	1		0	0	1		0	0	1		0	0	1		0	0	1		0	0	1		0	0	1		0	0	1		0	0	1		0	0	1
		0		1		0	0	1		0	0	1		0	0	1		0	0	1		0	0	1		0	0	1		0	0	1		0	0	1		0	0	1		0	0	1		0	0	1
		0		1		0	0	1		0	0	1		0	0	1		0	0	1		0	0	1		0	0	1		0	0	1		0	0	1		0	0	1		0	0	1		0	0	1
	Vitamin B6 metabolism	193.984	-33.5347	1	Vitamin B6 metabolism	116.916	-116.916	1		0	0	1		0	0	1		0	0	1		0	0	1		0	0	1		0	0	1		0	0	1		0	0	1		0	0	1		0	0	1
	Nicotinate and nicotinamide metabolism	132.178	132.178	1	Nicotinate and nicotinamide metabolism	92.8234	27.3503	1		0	0	1		0	0	1		0	0	1		0	0	1		0	0	1		0	0	1		0	0	1		0	0	1		0	0	1		0	0	1
		0		1	Pantothenate and CoA biosynthesis	61.8746	61.8746	1		0	0	1		0	0	1		0	0	1		0	0	1		0	0	1		0	0	1		0	0	1		0	0	1		0	0	1		0	0	1
		0		1		0	0	1		0	0	1		0	0	1		0	0	1		0	0	1		0	0	1		0	0	1		0	0	1		0	0	1		0	0	1		0	0	1
		0		1		0	0	1		0	0	1		0	0	1		0	0	1		0	0	1		0	0	1		0	0	1		0	0	1		0	0	1		0	0	1		0	0	1
	Folate biosynthesis	56.0085	-56.0085	1	Folate biosynthesis	176.531	176.531	1		0	0	1		0	0	1		0	0	1		0	0	1		0	0	1		0	0	1		0	0	1		0	0	1		0	0	1		0	0	1
	Retinol metabolism	24.0195	-24.0195	1	Retinol metabolism	14.076	14.076	1		0	0	1		0	0	1		0	0	1		0	0	1		0	0	1		0	0	1		0	0	1		0	0	1		0	0	1		0	0	1
		0		1		0	0	1		0	0	1		0	0	1		0	0	1		0	0	1		0	0	1		0	0	1		0	0	1		0	0	1		0	0	1		0	0	1
		0		1		0	0	1	Terpenoid backbone biosynthesis	28.4718	28.4718	1		0	0	1		0	0	1		0	0	1		0	0	1		0	0	1		0	0	1		0	0	1		0	0	1		0	0	1
		0		1	Nitrogen metabolism	147.165	147.165	1		0	0	1		0	0	1		0	0	1		0	0	1		0	0	1		0	0	1		0	0	1		0	0	1		0	0	1		0	0	1
		0		1		0	0	1		0	0	1		0	0	1		0	0	1		0	0	1		0	0	1		0	0	1		0	0	1		0	0	1		0	0	1		0	0	1
		0		1		0	0	1		0	0	1		0	0	1		0	0	1		0	0	1		0	0	1		0	0	1		0	0	1		0	0	1		0	0	1		0	0	1
		0		1	Metabolism of xenobiotics by cytochrome P450	19.6263	19.6263	1		0	0	1		0	0	1		0	0	1		0	0	1		0	0	1		0	0	1		0	0	1		0	0	1		0	0	1		0	0	1
	Drug metabolism - cytochrome P450	11.2315	11.2315	1	Drug metabolism - cytochrome P450	33.2469	0.510368	1		0	0	1		0	0	1		0	0	1		0	0	1		0	0	1		0	0	1		0	0	1		0	0	1		0	0	1		0	0	1
	Drug metabolism - other enzymes	91.5009	-91.5009	1	Drug metabolism - other enzymes	104.645	104.645	1		0	0	1		0	0	1		0	0	1		0	0	1		0	0	1		0	0	1		0	0	1		0	0	1		0	0	1		0	0	1
	Biosynthesis of unsaturated fatty acids	80.1925	-80.1925	1	Biosynthesis of unsaturated fatty acids	101.479	101.479	1		0	0	1		0	0	1		0	0	1		0	0	1		0	0	1		0	0	1		0	0	1		0	0	1		0	0	1		0	0	1
	Metabolic pathways	28.1214	-10.5531	1	Metabolic pathways	77.5714	40.871	1	Metabolic pathways	29.1901	4.73958	1		0	0	1		0	0	1		0	0	1		0	0	1		0	0	1		0	0	1		0	0	1		0	0	1		0	0	1
	ABC transporters	16.5794	-16.5794	1	ABC transporters	145.988	101.758	1	ABC transporters	20.0464	20.0464	1		0	0	1		0	0	1		0	0	1		0	0	1		0	0	1		0	0	1		0	0	1		0	0	1		0	0	1
		0		1		0	0	1		0	0	1		0	0	1		0	0	1		0	0	1		0	0	1		0	0	1		0	0	1		0	0	1		0	0	1		0	0	1
	Ribosome	46.9729	-46.9729	1	Ribosome	398.782	398.782	1	Ribosome	13.9003	13.9003	1		0	0	1		0	0	1		0	0	1		0	0	1		0	0	1		0	0	1		0	0	1		0	0	1		0	0	1
		0		1	RNA transport	12.7961	0.708758	1		0	0	1		0	0	1		0	0	1		0	0	1		0	0	1		0	0	1		0	0	1		0	0	1		0	0	1		0	0	1
	mRNA surveillance pathway	13.7316	13.7316	1	mRNA surveillance pathway	84.389	84.389	1	mRNA surveillance pathway	13.5892	13.5892	1		0	0	1		0	0	1		0	0	1		0	0	1		0	0	1		0	0	1		0	0	1		0	0	1		0	0	1
	RNA degradation	39.611	39.611	1		0	0	1	RNA degradation	99.4328	-99.4328	1		0	0	1		0	0	1		0	0	1		0	0	1		0	0	1		0	0	1		0	0	1		0	0	1		0	0	1
		0		1		0	0	1		0	0	1		0	0	1		0	0	1		0	0	1		0	0	1		0	0	1		0	0	1		0	0	1		0	0	1		0	0	1
		0		1	Basal transcription factors	248.114	-248.114	1	Basal transcription factors	74.336	-74.336	1		0	0	1		0	0	1		0	0	1		0	0	1		0	0	1		0	0	1		0	0	1		0	0	1		0	0	1
		0		1		0	0	1		0	0	1		0	0	1		0	0	1		0	0	1		0	0	1		0	0	1		0	0	1		0	0	1		0	0	1		0	0	1
	Spliceosome	30.6449	30.6449	1		0	0	1		0	0	1		0	0	1		0	0	1		0	0	1		0	0	1		0	0	1		0	0	1		0	0	1		0	0	1		0	0	1
	Proteasome	39.3587	39.3587	1		0	0	1		0	0	1		0	0	1		0	0	1		0	0	1		0	0	1		0	0	1		0	0	1		0	0	1		0	0	1		0	0	1
		0		1	Protein export	160.881	160.881	1	Protein export	92.0497	92.0497	1		0	0	1		0	0	1		0	0	1		0	0	1		0	0	1		0	0	1		0	0	1		0	0	1		0	0	1
	PPAR signaling pathway	106.986	-106.986	1	PPAR signaling pathway	301.851	244.109	1	PPAR signaling pathway	9.8996	9.8996	1		0	0	1		0	0	1		0	0	1		0	0	1		0	0	1		0	0	1		0	0	1		0	0	1		0	0	1
	Base excision repair	173.133	173.133	1	Base excision repair	116.522	-116.522	1		0	0	1		0	0	1		0	0	1		0	0	1		0	0	1		0	0	1		0	0	1		0	0	1		0	0	1		0	0	1
		0		1		0	0	1		0	0	1		0	0	1		0	0	1		0	0	1		0	0	1		0	0	1		0	0	1		0	0	1		0	0	1		0	0	1
		0		1		0	0	1		0	0	1		0	0	1		0	0	1		0	0	1		0	0	1		0	0	1		0	0	1		0	0	1		0	0	1		0	0	1
		0		1		0	0	1		0	0	1		0	0	1		0	0	1		0	0	1		0	0	1		0	0	1		0	0	1		0	0	1		0	0	1		0	0	1
		0		1		0	0	1		0	0	1		0	0	1		0	0	1		0	0	1		0	0	1		0	0	1		0	0	1		0	0	1		0	0	1		0	0	1
	MAPK signaling pathway	26.1953	26.1953	1	MAPK signaling pathway	112.893	-72.4693	1	MAPK signaling pathway	22.6068	-22.6068	1		0	0	1		0	0	1		0	0	1		0	0	1		0	0	1		0	0	1		0	0	1		0	0	1		0	0	1
		0		1	ErbB signaling pathway	126.424	-52.6288	1	ErbB signaling pathway	6.75523	-6.75523	1		0	0	1		0	0	1		0	0	1		0	0	1		0	0	1		0	0	1		0	0	1		0	0	1		0	0	1
	Calcium signaling pathway	5.1162	-5.1162	1	Calcium signaling pathway	139.082	-66.662	1	Calcium signaling pathway	30.2624	7.22885	1		0	0	1		0	0	1		0	0	1		0	0	1		0	0	1		0	0	1		0	0	1		0	0	1		0	0	1
	Cytokine-cytokine receptor interaction	41.1884	27.5568	1	Cytokine-cytokine receptor interaction	102.35	-67.4786	1	Cytokine-cytokine receptor interaction	27.5515	-27.5515	1		0	0	1		0	0	1		0	0	1		0	0	1		0	0	1		0	0	1		0	0	1		0	0	1		0	0	1
	Chemokine signaling pathway	5.09421	5.09421	1	Chemokine signaling pathway	152.846	-63.7179	1	Chemokine signaling pathway	6.0617	1.25003	1		0	0	1		0	0	1		0	0	1		0	0	1		0	0	1		0	0	1		0	0	1		0	0	1		0	0	1
		0		1	Phosphatidylinositol signaling system	77.4882	-77.4882	1		0	0	1		0	0	1		0	0	1		0	0	1		0	0	1		0	0	1		0	0	1		0	0	1		0	0	1		0	0	1
		0		1	Neuroactive ligand-receptor interaction	41.0526	31.8946	1	Neuroactive ligand-receptor interaction	12.4716	12.4716	1		0	0	1		0	0	1		0	0	1		0	0	1		0	0	1		0	0	1		0	0	1		0	0	1		0	0	1
		0		1	Cell cycle	25.7264	12.3711	1	Cell cycle	17.8658	17.8658	1		0	0	1		0	0	1		0	0	1		0	0	1		0	0	1		0	0	1		0	0	1		0	0	1		0	0	1
		0		1	Oocyte meiosis	144.291	-102.6	1	Oocyte meiosis	40.9528	-1.85023	1		0	0	1		0	0	1		0	0	1		0	0	1		0	0	1		0	0	1		0	0	1		0	0	1		0	0	1
		0		1	p53 signaling pathway	12.9101	12.9101	1		0	0	1		0	0	1		0	0	1		0	0	1		0	0	1		0	0	1		0	0	1		0	0	1		0	0	1		0	0	1
	Ubiquitin mediated proteolysis	51.6037	51.6037	1	Ubiquitin mediated proteolysis	224.149	-88.2244	1	Ubiquitin mediated proteolysis	67.8964	-21.811	1		0	0	1		0	0	1		0	0	1		0	0	1		0	0	1		0	0	1		0	0	1		0	0	1		0	0	1
	Sulfur relay system	66.1919	-66.1919	1	Sulfur relay system	208.627	208.627	1		0	0	1		0	0	1		0	0	1		0	0	1		0	0	1		0	0	1		0	0	1		0	0	1		0	0	1		0	0	1
		0		1	SNARE interactions in vesicular transport	341.047	341.047	1	SNARE interactions in vesicular transport	30.4898	30.4898	1		0	0	1		0	0	1		0	0	1		0	0	1		0	0	1		0	0	1		0	0	1		0	0	1		0	0	1
	Regulation of autophagy	52.3725	52.3725	1	Regulation of autophagy	20.9899	20.9899	1		0	0	1		0	0	1		0	0	1		0	0	1		0	0	1		0	0	1		0	0	1		0	0	1		0	0	1		0	0	1
		0		1	Protein processing in endoplasmic reticulum	43.6496	43.6496	1	Protein processing in endoplasmic reticulum	11.0932	11.0932	1		0	0	1		0	0	1		0	0	1		0	0	1		0	0	1		0	0	1		0	0	1		0	0	1		0	0	1
		0		1	Lysosome	83.287	-83.287	1	Lysosome	28.8324	-28.8324	1		0	0	1		0	0	1		0	0	1		0	0	1		0	0	1		0	0	1		0	0	1		0	0	1		0	0	1
		0		1	Endocytosis	120.785	14.767	1	Endocytosis	59.8389	-7.95038	1		0	0	1		0	0	1		0	0	1		0	0	1		0	0	1		0	0	1		0	0	1		0	0	1		0	0	1
	Phagosome	14.1293	-14.1293	1	Phagosome	226.647	19.2973	1	Phagosome	48.0636	-32.9268	1		0	0	1		0	0	1		0	0	1		0	0	1		0	0	1		0	0	1		0	0	1		0	0	1		0	0	1
	Peroxisome	40.0693	-40.0693	1	Peroxisome	150.229	54.9916	1		0	0	1		0	0	1		0	0	1		0	0	1		0	0	1		0	0	1		0	0	1		0	0	1		0	0	1		0	0	1
	mTOR signaling pathway	27.2773	-27.2773	1	mTOR signaling pathway	12.6633	-12.6633	1		0	0	1		0	0	1		0	0	1		0	0	1		0	0	1		0	0	1		0	0	1		0	0	1		0	0	1		0	0	1
	Apoptosis	96.5008	65.1984	1	Apoptosis	56.1558	-38.0458	1		0	0	1		0	0	1		0	0	1		0	0	1		0	0	1		0	0	1		0	0	1		0	0	1		0	0	1		0	0	1
		0		1	Cardiac muscle contraction	33.0989	8.72843	1	Cardiac muscle contraction	6.06673	6.06673	1		0	0	1		0	0	1		0	0	1		0	0	1		0	0	1		0	0	1		0	0	1		0	0	1		0	0	1
	Vascular smooth muscle contraction	30.9763	30.9763	1	Vascular smooth muscle contraction	105.17	-70.9917	1	Vascular smooth muscle contraction	6.48164	6.48164	1		0	0	1		0	0	1		0	0	1		0	0	1		0	0	1		0	0	1		0	0	1		0	0	1		0	0	1
		0		1	Wnt signaling pathway	162.257	-68.6055	1	Wnt signaling pathway	45.9324	-29.2104	1		0	0	1		0	0	1		0	0	1		0	0	1		0	0	1		0	0	1		0	0	1		0	0	1		0	0	1
		0		1		0	0	1		0	0	1		0	0	1		0	0	1		0	0	1		0	0	1		0	0	1		0	0	1		0	0	1		0	0	1		0	0	1
		0		1		0	0	1		0	0	1		0	0	1		0	0	1		0	0	1		0	0	1		0	0	1		0	0	1		0	0	1		0	0	1		0	0	1
		0		1	Hedgehog signaling pathway	115.872	115.872	1	Hedgehog signaling pathway	48.2672	48.2672	1		0	0	1		0	0	1		0	0	1		0	0	1		0	0	1		0	0	1		0	0	1		0	0	1		0	0	1
		0		1	TGF-beta signaling pathway	44.076	44.076	1		0	0	1		0	0	1		0	0	1		0	0	1		0	0	1		0	0	1		0	0	1		0	0	1		0	0	1		0	0	1
	Axon guidance	11.1032	-11.1032	1	Axon guidance	101.357	-45.7883	1	Axon guidance	50.1919	-50.1919	1		0	0	1		0	0	1		0	0	1		0	0	1		0	0	1		0	0	1		0	0	1		0	0	1		0	0	1
		0		1	VEGF signaling pathway	35.6582	-6.54997	1		0	0	1		0	0	1		0	0	1		0	0	1		0	0	1		0	0	1		0	0	1		0	0	1		0	0	1		0	0	1
	Osteoclast differentiation	57.9541	57.9541	1	Osteoclast differentiation	164.807	-51.4302	1	Osteoclast differentiation	4.60312	-4.60312	1		0	0	1		0	0	1		0	0	1		0	0	1		0	0	1		0	0	1		0	0	1		0	0	1		0	0	1
	Focal adhesion	33.3159	-33.3159	1	Focal adhesion	73.9178	-73.9178	1	Focal adhesion	46.9472	-46.9472	1		0	0	1		0	0	1		0	0	1		0	0	1		0	0	1		0	0	1		0	0	1		0	0	1		0	0	1
	ECM-receptor interaction	54.4242	-54.4242	1	ECM-receptor interaction	122.878	11.3967	1	ECM-receptor interaction	90.3071	-73.6055	1		0	0	1		0	0	1		0	0	1		0	0	1		0	0	1		0	0	1		0	0	1		0	0	1		0	0	1
	Cell adhesion molecules (CAMs)	13.1327	-0.0165389	1	Cell adhesion molecules (CAMs)	317.014	-145.181	1	Cell adhesion molecules (CAMs)	55.4753	-35.3933	1		0	0	1		0	0	1		0	0	1		0	0	1		0	0	1		0	0	1		0	0	1		0	0	1		0	0	1
		0		1	Adherens junction	122.078	-29.9978	1	Adherens junction	6.61569	-6.61569	1		0	0	1		0	0	1		0	0	1		0	0	1		0	0	1		0	0	1		0	0	1		0	0	1		0	0	1
		0		1	Tight junction	179.487	165.084	1	Tight junction	87.3141	87.3141	1		0	0	1		0	0	1		0	0	1		0	0	1		0	0	1		0	0	1		0	0	1		0	0	1		0	0	1
		0		1	Gap junction	148.968	-136.035	1	Gap junction	23.1757	-23.1757	1		0	0	1		0	0	1		0	0	1		0	0	1		0	0	1		0	0	1		0	0	1		0	0	1		0	0	1
	Complement and coagulation cascades	55.954	-55.954	1	Complement and coagulation cascades	639.62	-52.6459	1	Complement and coagulation cascades	192.07	-79.5434	1		0	0	1		0	0	1		0	0	1		0	0	1		0	0	1		0	0	1		0	0	1		0	0	1		0	0	1
		0		1	Antigen processing and presentation	139.154	-139.154	1		0	0	1		0	0	1		0	0	1		0	0	1		0	0	1		0	0	1		0	0	1		0	0	1		0	0	1		0	0	1
		0		1	Renin-angiotensin system	35.3914	-35.3914	1		0	0	1		0	0	1		0	0	1		0	0	1		0	0	1		0	0	1		0	0	1		0	0	1		0	0	1		0	0	1
	Toll-like receptor signaling pathway	40.2824	14.6341	1	Toll-like receptor signaling pathway	202.653	-170.92	1	Toll-like receptor signaling pathway	13.3342	1.90229	1		0	0	1		0	0	1		0	0	1		0	0	1		0	0	1		0	0	1		0	0	1		0	0	1		0	0	1
		0		1	NOD-like receptor signaling pathway	155.73	-53.4434	1	NOD-like receptor signaling pathway	68.8578	68.8578	1		0	0	1		0	0	1		0	0	1		0	0	1		0	0	1		0	0	1		0	0	1		0	0	1		0	0	1
		0		1	RIG-I-like receptor signaling pathway	143.825	-94.3925	1		0	0	1		0	0	1		0	0	1		0	0	1		0	0	1		0	0	1		0	0	1		0	0	1		0	0	1		0	0	1
		0		1	Cytosolic DNA-sensing pathway	80.6914	-80.6914	1		0	0	1		0	0	1		0	0	1		0	0	1		0	0	1		0	0	1		0	0	1		0	0	1		0	0	1		0	0	1
	Jak-STAT signaling pathway	15.1067	-4.70181	1	Jak-STAT signaling pathway	74.7076	-22.4494	1	Jak-STAT signaling pathway	5.53399	5.53399	1		0	0	1		0	0	1		0	0	1		0	0	1		0	0	1		0	0	1		0	0	1		0	0	1		0	0	1
	Hematopoietic cell lineage	89.6665	78.5411	1	Hematopoietic cell lineage	132.256	-90.3604	1		0	0	1		0	0	1		0	0	1		0	0	1		0	0	1		0	0	1		0	0	1		0	0	1		0	0	1		0	0	1
		0		1	Natural killer cell mediated cytotoxicity	91.9801	-20.4885	1		0	0	1		0	0	1		0	0	1		0	0	1		0	0	1		0	0	1		0	0	1		0	0	1		0	0	1		0	0	1
		0		1	T cell receptor signaling pathway	102.765	-83.3593	1	T cell receptor signaling pathway	5.09953	-5.09953	1		0	0	1		0	0	1		0	0	1		0	0	1		0	0	1		0	0	1		0	0	1		0	0	1		0	0	1
		0		1	B cell receptor signaling pathway	70.8953	53.0177	1	B cell receptor signaling pathway	7.6493	-7.6493	1		0	0	1		0	0	1		0	0	1		0	0	1		0	0	1		0	0	1		0	0	1		0	0	1		0	0	1
		0		1	Fc epsilon RI signaling pathway	85.0474	66.9031	1		0	0	1		0	0	1		0	0	1		0	0	1		0	0	1		0	0	1		0	0	1		0	0	1		0	0	1		0	0	1
		0		1	Fc gamma R-mediated phagocytosis	194.543	-50.8201	1	Fc gamma R-mediated phagocytosis	64.5801	-64.5801	1		0	0	1		0	0	1		0	0	1		0	0	1		0	0	1		0	0	1		0	0	1		0	0	1		0	0	1
		0		1	Leukocyte transendothelial migration	205.474	-152.99	1	Leukocyte transendothelial migration	33.0365	-33.0365	1		0	0	1		0	0	1		0	0	1		0	0	1		0	0	1		0	0	1		0	0	1		0	0	1		0	0	1
	Intestinal immune network for IgA production	17.7366	17.7366	1	Intestinal immune network for IgA production	235.827	-100.013	1	Intestinal immune network for IgA production	9.40462	-9.40462	1		0	0	1		0	0	1		0	0	1		0	0	1		0	0	1		0	0	1		0	0	1		0	0	1		0	0	1
		0		1	Circadian rhythm - mammal	50.158	50.158	1	Circadian rhythm - mammal	221.782	5.72884	1		0	0	1		0	0	1		0	0	1		0	0	1		0	0	1		0	0	1		0	0	1		0	0	1		0	0	1
	Long-term potentiation	51.9602	-51.9602	1	Long-term potentiation	178.342	-178.342	1		0	0	1		0	0	1		0	0	1		0	0	1		0	0	1		0	0	1		0	0	1		0	0	1		0	0	1		0	0	1
		0		1	Neurotrophin signaling pathway	57.0278	-40.2536	1	Neurotrophin signaling pathway	4.40807	-4.40807	1		0	0	1		0	0	1		0	0	1		0	0	1		0	0	1		0	0	1		0	0	1		0	0	1		0	0	1
	Glutamatergic synapse	25.7694	-25.7694	1	Glutamatergic synapse	133.118	-27.5911	1		0	0	1		0	0	1		0	0	1		0	0	1		0	0	1		0	0	1		0	0	1		0	0	1		0	0	1		0	0	1
		0		1	Long-term depression	52.6463	-35.7505	1		0	0	1		0	0	1		0	0	1		0	0	1		0	0	1		0	0	1		0	0	1		0	0	1		0	0	1		0	0	1
		0		1	Olfactory transduction	27.0719	27.0719	1		0	0	1		0	0	1		0	0	1		0	0	1		0	0	1		0	0	1		0	0	1		0	0	1		0	0	1		0	0	1
	Taste transduction	31.188	31.188	1	Taste transduction	264.733	-18.9457	1		0	0	1		0	0	1		0	0	1		0	0	1		0	0	1		0	0	1		0	0	1		0	0	1		0	0	1		0	0	1
		0		1		0	0	1		0	0	1		0	0	1		0	0	1		0	0	1		0	0	1		0	0	1		0	0	1		0	0	1		0	0	1		0	0	1
	Regulation of actin cytoskeleton	17.0451	-17.0451	1	Regulation of actin cytoskeleton	64.6329	-55.9466	1	Regulation of actin cytoskeleton	21.9015	-21.9015	1		0	0	1		0	0	1		0	0	1		0	0	1		0	0	1		0	0	1		0	0	1		0	0	1		0	0	1
	Insulin signaling pathway	27.9313	-27.9313	1	Insulin signaling pathway	108.052	39.2783	1	Insulin signaling pathway	3.01066	3.01066	1		0	0	1		0	0	1		0	0	1		0	0	1		0	0	1		0	0	1		0	0	1		0	0	1		0	0	1
		0		1	GnRH signaling pathway	191.658	-156.819	1	GnRH signaling pathway	6.11944	-6.11944	1		0	0	1		0	0	1		0	0	1		0	0	1		0	0	1		0	0	1		0	0	1		0	0	1		0	0	1
		0		1	Progesterone-mediated oocyte maturation	124.707	36.1127	1	Progesterone-mediated oocyte maturation	24.6718	24.6718	1		0	0	1		0	0	1		0	0	1		0	0	1		0	0	1		0	0	1		0	0	1		0	0	1		0	0	1
		0		1	Melanogenesis	250.636	-155.658	1	Melanogenesis	42.2204	-3.34845	1		0	0	1		0	0	1		0	0	1		0	0	1		0	0	1		0	0	1		0	0	1		0	0	1		0	0	1
	Adipocytokine signaling pathway	34.8591	5.42746	1	Adipocytokine signaling pathway	61.0496	0.642367	1	Adipocytokine signaling pathway	5.77022	5.77022	1		0	0	1		0	0	1		0	0	1		0	0	1		0	0	1		0	0	1		0	0	1		0	0	1		0	0	1
	Type II diabetes mellitus	37.5943	-37.5943	1	Type II diabetes mellitus	90.0201	60.3696	1	Type II diabetes mellitus	9.03197	9.03197	1		0	0	1		0	0	1		0	0	1		0	0	1		0	0	1		0	0	1		0	0	1		0	0	1		0	0	1
	Type I diabetes mellitus	19.0344	19.0344	1	Type I diabetes mellitus	112.551	-112.551	1		0	0	1		0	0	1		0	0	1		0	0	1		0	0	1		0	0	1		0	0	1		0	0	1		0	0	1		0	0	1
	Maturity onset diabetes of the young	73.3983	-73.3983	1	Maturity onset diabetes of the young	146.809	146.809	1	Maturity onset diabetes of the young	17.6339	17.6339	1		0	0	1		0	0	1		0	0	1		0	0	1		0	0	1		0	0	1		0	0	1		0	0	1		0	0	1
	Aldosterone-regulated sodium reabsorption	22.8205	22.8205	1	Aldosterone-regulated sodium reabsorption	98.2753	-98.2753	1		0	0	1		0	0	1		0	0	1		0	0	1		0	0	1		0	0	1		0	0	1		0	0	1		0	0	1		0	0	1
	Endocrine and other factor-regulated calcium reabsorption	16.715	-16.715	1	Endocrine and other factor-regulated calcium reabsorption	176.306	-125.013	1	Endocrine and other factor-regulated calcium reabsorption	121.472	-121.472	1		0	0	1		0	0	1		0	0	1		0	0	1		0	0	1		0	0	1		0	0	1		0	0	1		0	0	1
	Vasopressin-regulated water reabsorption	23.6066	-23.6066	1	Vasopressin-regulated water reabsorption	288.637	106.025	1	Vasopressin-regulated water reabsorption	68.5023	68.5023	1		0	0	1		0	0	1		0	0	1		0	0	1		0	0	1		0	0	1		0	0	1		0	0	1		0	0	1
	Proximal tubule bicarbonate reclamation	116.923	-116.923	1	Proximal tubule bicarbonate reclamation	417.817	-86.4938	1		0	0	1		0	0	1		0	0	1		0	0	1		0	0	1		0	0	1		0	0	1		0	0	1		0	0	1		0	0	1
		0		1		0	0	1		0	0	1		0	0	1		0	0	1		0	0	1		0	0	1		0	0	1		0	0	1		0	0	1		0	0	1		0	0	1
	Salivary secretion	50.5689	-50.5689	1	Salivary secretion	330.363	-41.6659	1	Salivary secretion	12.9835	-12.9835	1		0	0	1		0	0	1		0	0	1		0	0	1		0	0	1		0	0	1		0	0	1		0	0	1		0	0	1
	Gastric acid secretion	11.7276	-11.7276	1	Gastric acid secretion	228.553	-213.371	1		0	0	1		0	0	1		0	0	1		0	0	1		0	0	1		0	0	1		0	0	1		0	0	1		0	0	1		0	0	1
	Pancreatic secretion	9.26601	-9.26601	1	Pancreatic secretion	149.03	-110.719	1		0	0	1		0	0	1		0	0	1		0	0	1		0	0	1		0	0	1		0	0	1		0	0	1		0	0	1		0	0	1
		0		1	Carbohydrate digestion and absorption	101.6	20.6604	1		0	0	1		0	0	1		0	0	1		0	0	1		0	0	1		0	0	1		0	0	1		0	0	1		0	0	1		0	0	1
	Protein digestion and absorption	46.908	-46.908	1	Protein digestion and absorption	169.528	60.2681	1	Protein digestion and absorption	62.7553	-62.7553	1		0	0	1		0	0	1		0	0	1		0	0	1		0	0	1		0	0	1		0	0	1		0	0	1		0	0	1
	Fat digestion and absorption	58.9115	-58.9115	1	Fat digestion and absorption	95.6087	55.8013	1		0	0	1		0	0	1		0	0	1		0	0	1		0	0	1		0	0	1		0	0	1		0	0	1		0	0	1		0	0	1
	Bile secretion	9.04333	-9.04333	1	Bile secretion	268.666	-99.2989	1	Bile secretion	5.68279	5.68279	1		0	0	1		0	0	1		0	0	1		0	0	1		0	0	1		0	0	1		0	0	1		0	0	1		0	0	1
	Vitamin digestion and absorption	179.356	-179.356	1		0	0	1		0	0	1		0	0	1		0	0	1		0	0	1		0	0	1		0	0	1		0	0	1		0	0	1		0	0	1		0	0	1
	Mineral absorption	17.1227	-17.1227	1	Mineral absorption	210.787	-93.5504	1	Mineral absorption	38.5523	-38.5523	1		0	0	1		0	0	1		0	0	1		0	0	1		0	0	1		0	0	1		0	0	1		0	0	1		0	0	1
	Alzheimer's disease	13.0935	-13.0935	1	Alzheimer's disease	46.43	22.3102	1	Alzheimer's disease	4.28773	4.28773	1		0	0	1		0	0	1		0	0	1		0	0	1		0	0	1		0	0	1		0	0	1		0	0	1		0	0	1
		0		1	Parkinson's disease	22.0682	-5.33874	1		0	0	1		0	0	1		0	0	1		0	0	1		0	0	1		0	0	1		0	0	1		0	0	1		0	0	1		0	0	1
		0		1	Amyotrophic lateral sclerosis (ALS)	19.7936	19.7936	1		0	0	1		0	0	1		0	0	1		0	0	1		0	0	1		0	0	1		0	0	1		0	0	1		0	0	1		0	0	1
		0		1	Huntington's disease	34.1412	5.98111	1	Huntington's disease	10.2295	10.2295	1		0	0	1		0	0	1		0	0	1		0	0	1		0	0	1		0	0	1		0	0	1		0	0	1		0	0	1
	Prion diseases	120.651	-120.651	1	Prion diseases	819.947	416.821	1	Prion diseases	107.061	47.3741	1		0	0	1		0	0	1		0	0	1		0	0	1		0	0	1		0	0	1		0	0	1		0	0	1		0	0	1
		0		1	Bacterial invasion of epithelial cells	52.4045	7.31347	1	Bacterial invasion of epithelial cells	133.276	-57.5076	1		0	0	1		0	0	1		0	0	1		0	0	1		0	0	1		0	0	1		0	0	1		0	0	1		0	0	1
		0		1	Leishmaniasis	231.432	-167.865	1	Leishmaniasis	7.6493	-7.6493	1		0	0	1		0	0	1		0	0	1		0	0	1		0	0	1		0	0	1		0	0	1		0	0	1		0	0	1
		0		1	Chagas disease	91.957	21.5004	1	Chagas disease	14.2787	4.27575	1		0	0	1		0	0	1		0	0	1		0	0	1		0	0	1		0	0	1		0	0	1		0	0	1		0	0	1
		0		1	African trypanosomiasis	490.572	-490.572	1	African trypanosomiasis	77.5507	-77.5507	1		0	0	1		0	0	1		0	0	1		0	0	1		0	0	1		0	0	1		0	0	1		0	0	1		0	0	1
	Malaria	23.8417	-23.8417	1	Malaria	559.64	-349.836	1	Malaria	74.0159	-47.9196	1		0	0	1		0	0	1		0	0	1		0	0	1		0	0	1		0	0	1		0	0	1		0	0	1		0	0	1
		0		1	Toxoplasmosis	93.8903	-70.9723	1	Toxoplasmosis	8.66558	2.33857	1		0	0	1		0	0	1		0	0	1		0	0	1		0	0	1		0	0	1		0	0	1		0	0	1		0	0	1
	Amoebiasis	113.698	21.3289	1	Amoebiasis	202.509	57.9913	1	Amoebiasis	49.3344	-30.1407	1		0	0	1		0	0	1		0	0	1		0	0	1		0	0	1		0	0	1		0	0	1		0	0	1		0	0	1
		0		1	Staphylococcus aureus infection	717.603	-487.961	1	Staphylococcus aureus infection	231.923	-183.867	1		0	0	1		0	0	1		0	0	1		0	0	1		0	0	1		0	0	1		0	0	1		0	0	1		0	0	1
	Tuberculosis	4.38769	-4.38769	1	Tuberculosis	138.511	-65.1699	1	Tuberculosis	29.769	-29.769	1		0	0	1		0	0	1		0	0	1		0	0	1		0	0	1		0	0	1		0	0	1		0	0	1		0	0	1
		0		1	Hepatitis C	106.083	-3.73099	1	Hepatitis C	8.04025	8.04025	1		0	0	1		0	0	1		0	0	1		0	0	1		0	0	1		0	0	1		0	0	1		0	0	1		0	0	1
		0		1	Measles	131.928	-120.251	1		0	0	1		0	0	1		0	0	1		0	0	1		0	0	1		0	0	1		0	0	1		0	0	1		0	0	1		0	0	1
	Pathways in cancer (overview)	1.17417	-1.17417	1	Pathways in cancer (overview)	67.4338	-37.845	1	Pathways in cancer (overview)	22.3621	-19.8364	1		0	0	1		0	0	1		0	0	1		0	0	1		0	0	1		0	0	1		0	0	1		0	0	1		0	0	1
		0		1	Colorectal cancer	45.122	-45.122	1	Colorectal cancer	8.25639	-8.25639	1		0	0	1		0	0	1		0	0	1		0	0	1		0	0	1		0	0	1		0	0	1		0	0	1		0	0	1
		0		1	Renal cell carcinoma	19.4864	0.190037	1	Renal cell carcinoma	14.2098	-2.30299	1		0	0	1		0	0	1		0	0	1		0	0	1		0	0	1		0	0	1		0	0	1		0	0	1		0	0	1
		0		1	Pancreatic cancer	30.3801	-30.3801	1		0	0	1		0	0	1		0	0	1		0	0	1		0	0	1		0	0	1		0	0	1		0	0	1		0	0	1		0	0	1
		0		1	Endometrial cancer	58.014	-58.014	1		0	0	1		0	0	1		0	0	1		0	0	1		0	0	1		0	0	1		0	0	1		0	0	1		0	0	1		0	0	1
		0		1	Glioma	149.631	-149.631	1	Glioma	31.8175	-31.8175	1		0	0	1		0	0	1		0	0	1		0	0	1		0	0	1		0	0	1		0	0	1		0	0	1		0	0	1
		0		1	Prostate cancer	69.2453	-14.383	1	Prostate cancer	48.8778	-5.68673	1		0	0	1		0	0	1		0	0	1		0	0	1		0	0	1		0	0	1		0	0	1		0	0	1		0	0	1
		0		1	Thyroid cancer	27.6644	-27.6644	1		0	0	1		0	0	1		0	0	1		0	0	1		0	0	1		0	0	1		0	0	1		0	0	1		0	0	1		0	0	1
		0		1	Basal cell carcinoma	119.881	-49.3564	1	Basal cell carcinoma	41.8489	-41.8489	1		0	0	1		0	0	1		0	0	1		0	0	1		0	0	1		0	0	1		0	0	1		0	0	1		0	0	1
		0		1	Melanoma	62.6469	-62.6469	1	Melanoma	32.498	-32.498	1		0	0	1		0	0	1		0	0	1		0	0	1		0	0	1		0	0	1		0	0	1		0	0	1		0	0	1
		0		1	Bladder cancer	108.175	-108.175	1		0	0	1		0	0	1		0	0	1		0	0	1		0	0	1		0	0	1		0	0	1		0	0	1		0	0	1		0	0	1
		0		1	Chronic myeloid leukemia	48.1649	8.09115	1		0	0	1		0	0	1		0	0	1		0	0	1		0	0	1		0	0	1		0	0	1		0	0	1		0	0	1		0	0	1
		0		1	Acute myeloid leukemia	44.1612	-44.1612	1		0	0	1		0	0	1		0	0	1		0	0	1		0	0	1		0	0	1		0	0	1		0	0	1		0	0	1		0	0	1
	Small cell lung cancer	4.30528	-4.30528	1	Small cell lung cancer	27.6509	-27.6509	1	Small cell lung cancer	18.5192	-18.5192	1		0	0	1		0	0	1		0	0	1		0	0	1		0	0	1		0	0	1		0	0	1		0	0	1		0	0	1
		0		1	Non-small cell lung cancer	46.2511	-46.2511	1		0	0	1		0	0	1		0	0	1		0	0	1		0	0	1		0	0	1		0	0	1		0	0	1		0	0	1		0	0	1
		0		1	Asthma	204.002	-204.002	1		0	0	1		0	0	1		0	0	1		0	0	1		0	0	1		0	0	1		0	0	1		0	0	1		0	0	1		0	0	1
	Autoimmune thyroid disease	19.0344	19.0344	1	Autoimmune thyroid disease	177.08	-177.08	1		0	0	1		0	0	1		0	0	1		0	0	1		0	0	1		0	0	1		0	0	1		0	0	1		0	0	1		0	0	1
	Systemic lupus erythematosus	42.193	-28.0038	1	Systemic lupus erythematosus	480.78	-166.63	1	Systemic lupus erythematosus	118.851	-73.9246	1		0	0	1		0	0	1		0	0	1		0	0	1		0	0	1		0	0	1		0	0	1		0	0	1		0	0	1
	Rheumatoid arthritis	8.76865	8.76865	1	Rheumatoid arthritis	80.5119	-26.2558	1	Rheumatoid arthritis	17.5847	-3.45417	1		0	0	1		0	0	1		0	0	1		0	0	1		0	0	1		0	0	1		0	0	1		0	0	1		0	0	1
	Allograft rejection	21.6781	21.6781	1	Allograft rejection	201.674	-201.674	1		0	0	1		0	0	1		0	0	1		0	0	1		0	0	1		0	0	1		0	0	1		0	0	1		0	0	1		0	0	1
	Graft-versus-host disease	24.3878	24.3878	1	Graft-versus-host disease	144.206	-144.206	1		0	0	1		0	0	1		0	0	1		0	0	1		0	0	1		0	0	1		0	0	1		0	0	1		0	0	1		0	0	1
	Primary immunodeficiency	21.4811	21.4811	1	Primary immunodeficiency	204.394	-204.394	1		0	0	1		0	0	1		0	0	1		0	0	1		0	0	1		0	0	1		0	0	1		0	0	1		0	0	1		0	0	1
	Hypertrophic cardiomyopathy (HCM)	18.7045	18.7045	1	Hypertrophic cardiomyopathy (HCM)	87.5149	6.31141	1	Hypertrophic cardiomyopathy (HCM)	16.3834	-5.46333	1		0	0	1		0	0	1		0	0	1		0	0	1		0	0	1		0	0	1		0	0	1		0	0	1		0	0	1
		0		1	Arrhythmogenic right ventricular cardiomyopathy (ARVC)	85.4029	-4.82327	1	Arrhythmogenic right ventricular cardiomyopathy (ARVC)	12.1371	-12.1371	1		0	0	1		0	0	1		0	0	1		0	0	1		0	0	1		0	0	1		0	0	1		0	0	1		0	0	1
		0		1	Dilated cardiomyopathy (DCM)	173.647	-77.4179	1	Dilated cardiomyopathy (DCM)	15.09	-5.03202	1		0	0	1		0	0	1		0	0	1		0	0	1		0	0	1		0	0	1		0	0	1		0	0	1		0	0	1
	Viral myocarditis	12.5873	12.5873	1	Viral myocarditis	253.173	-49.169	1	Viral myocarditis	23.7932	23.7932	1		0	0	1		0	0	1		0	0	1		0	0	1		0	0	1		0	0	1		0	0	1		0	0	1		0	0	1
	#N/A	#N/A	#N/A	#N/A	#N/A	#N/A	#N/A	#N/A	#N/A	#N/A	#N/A	#N/A	#N/A	#N/A	#N/A	#N/A	#N/A	#N/A	#N/A	#N/A	#N/A	#N/A	#N/A	#N/A	#N/A	#N/A	#N/A	#N/A	#N/A	#N/A	#N/A	#N/A	#N/A	#N/A	#N/A	#N/A	#N/A	#N/A	#N/A	#N/A	#N/A	#N/A	#N/A	#N/A	#N/A	#N/A	#N/A	#N/A	#N/A
	#N/A	#N/A	#N/A	#N/A	#N/A	#N/A	#N/A	#N/A	#N/A	#N/A	#N/A	#N/A	#N/A	#N/A	#N/A	#N/A	#N/A	#N/A	#N/A	#N/A	#N/A	#N/A	#N/A	#N/A	#N/A	#N/A	#N/A	#N/A	#N/A	#N/A	#N/A	#N/A	#N/A	#N/A	#N/A	#N/A	#N/A	#N/A	#N/A	#N/A	#N/A	#N/A	#N/A	#N/A	#N/A	#N/A	#N/A	#N/A	#N/A
	#N/A	#N/A	#N/A	#N/A	#N/A	#N/A	#N/A	#N/A	#N/A	#N/A	#N/A	#N/A	#N/A	#N/A	#N/A	#N/A	#N/A	#N/A	#N/A	#N/A	#N/A	#N/A	#N/A	#N/A	#N/A	#N/A	#N/A	#N/A	#N/A	#N/A	#N/A	#N/A	#N/A	#N/A	#N/A	#N/A	#N/A	#N/A	#N/A	#N/A	#N/A	#N/A	#N/A	#N/A	#N/A	#N/A	#N/A	#N/A	#N/A
	#N/A	#N/A	#N/A	#N/A	#N/A	#N/A	#N/A	#N/A	#N/A	#N/A	#N/A	#N/A	#N/A	#N/A	#N/A	#N/A	#N/A	#N/A	#N/A	#N/A	#N/A	#N/A	#N/A	#N/A	#N/A	#N/A	#N/A	#N/A	#N/A	#N/A	#N/A	#N/A	#N/A	#N/A	#N/A	#N/A	#N/A	#N/A	#N/A	#N/A	#N/A	#N/A	#N/A	#N/A	#N/A	#N/A	#N/A	#N/A	#N/A
	#N/A	#N/A	#N/A	#N/A	#N/A	#N/A	#N/A	#N/A	#N/A	#N/A	#N/A	#N/A	#N/A	#N/A	#N/A	#N/A	#N/A	#N/A	#N/A	#N/A	#N/A	#N/A	#N/A	#N/A	#N/A	#N/A	#N/A	#N/A	#N/A	#N/A	#N/A	#N/A	#N/A	#N/A	#N/A	#N/A	#N/A	#N/A	#N/A	#N/A	#N/A	#N/A	#N/A	#N/A	#N/A	#N/A	#N/A	#N/A	#N/A
	#N/A	#N/A	#N/A	#N/A	#N/A	#N/A	#N/A	#N/A	#N/A	#N/A	#N/A	#N/A	#N/A	#N/A	#N/A	#N/A	#N/A	#N/A	#N/A	#N/A	#N/A	#N/A	#N/A	#N/A	#N/A	#N/A	#N/A	#N/A	#N/A	#N/A	#N/A	#N/A	#N/A	#N/A	#N/A	#N/A	#N/A	#N/A	#N/A	#N/A	#N/A	#N/A	#N/A	#N/A	#N/A	#N/A	#N/A	#N/A	#N/A
	#N/A	#N/A	#N/A	#N/A	#N/A	#N/A	#N/A	#N/A	#N/A	#N/A	#N/A	#N/A	#N/A	#N/A	#N/A	#N/A	#N/A	#N/A	#N/A	#N/A	#N/A	#N/A	#N/A	#N/A	#N/A	#N/A	#N/A	#N/A	#N/A	#N/A	#N/A	#N/A	#N/A	#N/A	#N/A	#N/A	#N/A	#N/A	#N/A	#N/A	#N/A	#N/A	#N/A	#N/A	#N/A	#N/A	#N/A	#N/A	#N/A
	#N/A	#N/A	#N/A	#N/A	#N/A	#N/A	#N/A	#N/A	#N/A	#N/A	#N/A	#N/A	#N/A	#N/A	#N/A	#N/A	#N/A	#N/A	#N/A	#N/A	#N/A	#N/A	#N/A	#N/A	#N/A	#N/A	#N/A	#N/A	#N/A	#N/A	#N/A	#N/A	#N/A	#N/A	#N/A	#N/A	#N/A	#N/A	#N/A	#N/A	#N/A	#N/A	#N/A	#N/A	#N/A	#N/A	#N/A	#N/A	#N/A
	#N/A	#N/A	#N/A	#N/A	#N/A	#N/A	#N/A	#N/A	#N/A	#N/A	#N/A	#N/A	#N/A	#N/A	#N/A	#N/A	#N/A	#N/A	#N/A	#N/A	#N/A	#N/A	#N/A	#N/A	#N/A	#N/A	#N/A	#N/A	#N/A	#N/A	#N/A	#N/A	#N/A	#N/A	#N/A	#N/A	#N/A	#N/A	#N/A	#N/A	#N/A	#N/A	#N/A	#N/A	#N/A	#N/A	#N/A	#N/A	#N/A
	#N/A	#N/A	#N/A	#N/A	#N/A	#N/A	#N/A	#N/A	#N/A	#N/A	#N/A	#N/A	#N/A	#N/A	#N/A	#N/A	#N/A	#N/A	#N/A	#N/A	#N/A	#N/A	#N/A	#N/A	#N/A	#N/A	#N/A	#N/A	#N/A	#N/A	#N/A	#N/A	#N/A	#N/A	#N/A	#N/A	#N/A	#N/A	#N/A	#N/A	#N/A	#N/A	#N/A	#N/A	#N/A	#N/A	#N/A	#N/A	#N/A
	#N/A	#N/A	#N/A	#N/A	#N/A	#N/A	#N/A	#N/A	#N/A	#N/A	#N/A	#N/A	#N/A	#N/A	#N/A	#N/A	#N/A	#N/A	#N/A	#N/A	#N/A	#N/A	#N/A	#N/A	#N/A	#N/A	#N/A	#N/A	#N/A	#N/A	#N/A	#N/A	#N/A	#N/A	#N/A	#N/A	#N/A	#N/A	#N/A	#N/A	#N/A	#N/A	#N/A	#N/A	#N/A	#N/A	#N/A	#N/A	#N/A
	#N/A	#N/A	#N/A	#N/A	#N/A	#N/A	#N/A	#N/A	#N/A	#N/A	#N/A	#N/A	#N/A	#N/A	#N/A	#N/A	#N/A	#N/A	#N/A	#N/A	#N/A	#N/A	#N/A	#N/A	#N/A	#N/A	#N/A	#N/A	#N/A	#N/A	#N/A	#N/A	#N/A	#N/A	#N/A	#N/A	#N/A	#N/A	#N/A	#N/A	#N/A	#N/A	#N/A	#N/A	#N/A	#N/A	#N/A	#N/A	#N/A
	#N/A	#N/A	#N/A	#N/A	#N/A	#N/A	#N/A	#N/A	#N/A	#N/A	#N/A	#N/A	#N/A	#N/A	#N/A	#N/A	#N/A	#N/A	#N/A	#N/A	#N/A	#N/A	#N/A	#N/A	#N/A	#N/A	#N/A	#N/A	#N/A	#N/A	#N/A	#N/A	#N/A	#N/A	#N/A	#N/A	#N/A	#N/A	#N/A	#N/A	#N/A	#N/A	#N/A	#N/A	#N/A	#N/A	#N/A	#N/A	#N/A
	#N/A	#N/A	#N/A	#N/A	#N/A	#N/A	#N/A	#N/A	#N/A	#N/A	#N/A	#N/A	#N/A	#N/A	#N/A	#N/A	#N/A	#N/A	#N/A	#N/A	#N/A	#N/A	#N/A	#N/A	#N/A	#N/A	#N/A	#N/A	#N/A	#N/A	#N/A	#N/A	#N/A	#N/A	#N/A	#N/A	#N/A	#N/A	#N/A	#N/A	#N/A	#N/A	#N/A	#N/A	#N/A	#N/A	#N/A	#N/A	#N/A
	#N/A	#N/A	#N/A	#N/A	#N/A	#N/A	#N/A	#N/A	#N/A	#N/A	#N/A	#N/A	#N/A	#N/A	#N/A	#N/A	#N/A	#N/A	#N/A	#N/A	#N/A	#N/A	#N/A	#N/A	#N/A	#N/A	#N/A	#N/A	#N/A	#N/A	#N/A	#N/A	#N/A	#N/A	#N/A	#N/A	#N/A	#N/A	#N/A	#N/A	#N/A	#N/A	#N/A	#N/A	#N/A	#N/A	#N/A	#N/A	#N/A
	#N/A	#N/A	#N/A	#N/A	#N/A	#N/A	#N/A	#N/A	#N/A	#N/A	#N/A	#N/A	#N/A	#N/A	#N/A	#N/A	#N/A	#N/A	#N/A	#N/A	#N/A	#N/A	#N/A	#N/A	#N/A	#N/A	#N/A	#N/A	#N/A	#N/A	#N/A	#N/A	#N/A	#N/A	#N/A	#N/A	#N/A	#N/A	#N/A	#N/A	#N/A	#N/A	#N/A	#N/A	#N/A	#N/A	#N/A	#N/A	#N/A
	#N/A	#N/A	#N/A	#N/A	#N/A	#N/A	#N/A	#N/A	#N/A	#N/A	#N/A	#N/A	#N/A	#N/A	#N/A	#N/A	#N/A	#N/A	#N/A	#N/A	#N/A	#N/A	#N/A	#N/A	#N/A	#N/A	#N/A	#N/A	#N/A	#N/A	#N/A	#N/A	#N/A	#N/A	#N/A	#N/A	#N/A	#N/A	#N/A	#N/A	#N/A	#N/A	#N/A	#N/A	#N/A	#N/A	#N/A	#N/A	#N/A
	#N/A	#N/A	#N/A	#N/A	#N/A	#N/A	#N/A	#N/A	#N/A	#N/A	#N/A	#N/A	#N/A	#N/A	#N/A	#N/A	#N/A	#N/A	#N/A	#N/A	#N/A	#N/A	#N/A	#N/A	#N/A	#N/A	#N/A	#N/A	#N/A	#N/A	#N/A	#N/A	#N/A	#N/A	#N/A	#N/A	#N/A	#N/A	#N/A	#N/A	#N/A	#N/A	#N/A	#N/A	#N/A	#N/A	#N/A	#N/A	#N/A
	#N/A	#N/A	#N/A	#N/A	#N/A	#N/A	#N/A	#N/A	#N/A	#N/A	#N/A	#N/A	#N/A	#N/A	#N/A	#N/A	#N/A	#N/A	#N/A	#N/A	#N/A	#N/A	#N/A	#N/A	#N/A	#N/A	#N/A	#N/A	#N/A	#N/A	#N/A	#N/A	#N/A	#N/A	#N/A	#N/A	#N/A	#N/A	#N/A	#N/A	#N/A	#N/A	#N/A	#N/A	#N/A	#N/A	#N/A	#N/A	#N/A
	#N/A	#N/A	#N/A	#N/A	#N/A	#N/A	#N/A	#N/A	#N/A	#N/A	#N/A	#N/A	#N/A	#N/A	#N/A	#N/A	#N/A	#N/A	#N/A	#N/A	#N/A	#N/A	#N/A	#N/A	#N/A	#N/A	#N/A	#N/A	#N/A	#N/A	#N/A	#N/A	#N/A	#N/A	#N/A	#N/A	#N/A	#N/A	#N/A	#N/A	#N/A	#N/A	#N/A	#N/A	#N/A	#N/A	#N/A	#N/A	#N/A
	#N/A	#N/A	#N/A	#N/A	#N/A	#N/A	#N/A	#N/A	#N/A	#N/A	#N/A	#N/A	#N/A	#N/A	#N/A	#N/A	#N/A	#N/A	#N/A	#N/A	#N/A	#N/A	#N/A	#N/A	#N/A	#N/A	#N/A	#N/A	#N/A	#N/A	#N/A	#N/A	#N/A	#N/A	#N/A	#N/A	#N/A	#N/A	#N/A	#N/A	#N/A	#N/A	#N/A	#N/A	#N/A	#N/A	#N/A	#N/A	#N/A
	#N/A	#N/A	#N/A	#N/A	#N/A	#N/A	#N/A	#N/A	#N/A	#N/A	#N/A	#N/A	#N/A	#N/A	#N/A	#N/A	#N/A	#N/A	#N/A	#N/A	#N/A	#N/A	#N/A	#N/A	#N/A	#N/A	#N/A	#N/A	#N/A	#N/A	#N/A	#N/A	#N/A	#N/A	#N/A	#N/A	#N/A	#N/A	#N/A	#N/A	#N/A	#N/A	#N/A	#N/A	#N/A	#N/A	#N/A	#N/A	#N/A
	#N/A	#N/A	#N/A	#N/A	#N/A	#N/A	#N/A	#N/A	#N/A	#N/A	#N/A	#N/A	#N/A	#N/A	#N/A	#N/A	#N/A	#N/A	#N/A	#N/A	#N/A	#N/A	#N/A	#N/A	#N/A	#N/A	#N/A	#N/A	#N/A	#N/A	#N/A	#N/A	#N/A	#N/A	#N/A	#N/A	#N/A	#N/A	#N/A	#N/A	#N/A	#N/A	#N/A	#N/A	#N/A	#N/A	#N/A	#N/A	#N/A
	#N/A	#N/A	#N/A	#N/A	#N/A	#N/A	#N/A	#N/A	#N/A	#N/A	#N/A	#N/A	#N/A	#N/A	#N/A	#N/A	#N/A	#N/A	#N/A	#N/A	#N/A	#N/A	#N/A	#N/A	#N/A	#N/A	#N/A	#N/A	#N/A	#N/A	#N/A	#N/A	#N/A	#N/A	#N/A	#N/A	#N/A	#N/A	#N/A	#N/A	#N/A	#N/A	#N/A	#N/A	#N/A	#N/A	#N/A	#N/A	#N/A
	#N/A	#N/A	#N/A	#N/A	#N/A	#N/A	#N/A	#N/A	#N/A	#N/A	#N/A	#N/A	#N/A	#N/A	#N/A	#N/A	#N/A	#N/A	#N/A	#N/A	#N/A	#N/A	#N/A	#N/A	#N/A	#N/A	#N/A	#N/A	#N/A	#N/A	#N/A	#N/A	#N/A	#N/A	#N/A	#N/A	#N/A	#N/A	#N/A	#N/A	#N/A	#N/A	#N/A	#N/A	#N/A	#N/A	#N/A	#N/A	#N/A
	#N/A	#N/A	#N/A	#N/A	#N/A	#N/A	#N/A	#N/A	#N/A	#N/A	#N/A	#N/A	#N/A	#N/A	#N/A	#N/A	#N/A	#N/A	#N/A	#N/A	#N/A	#N/A	#N/A	#N/A	#N/A	#N/A	#N/A	#N/A	#N/A	#N/A	#N/A	#N/A	#N/A	#N/A	#N/A	#N/A	#N/A	#N/A	#N/A	#N/A	#N/A	#N/A	#N/A	#N/A	#N/A	#N/A	#N/A	#N/A	#N/A
	#N/A	#N/A	#N/A	#N/A	#N/A	#N/A	#N/A	#N/A	#N/A	#N/A	#N/A	#N/A	#N/A	#N/A	#N/A	#N/A	#N/A	#N/A	#N/A	#N/A	#N/A	#N/A	#N/A	#N/A	#N/A	#N/A	#N/A	#N/A	#N/A	#N/A	#N/A	#N/A	#N/A	#N/A	#N/A	#N/A	#N/A	#N/A	#N/A	#N/A	#N/A	#N/A	#N/A	#N/A	#N/A	#N/A	#N/A	#N/A	#N/A
	#N/A	#N/A	#N/A	#N/A	#N/A	#N/A	#N/A	#N/A	#N/A	#N/A	#N/A	#N/A	#N/A	#N/A	#N/A	#N/A	#N/A	#N/A	#N/A	#N/A	#N/A	#N/A	#N/A	#N/A	#N/A	#N/A	#N/A	#N/A	#N/A	#N/A	#N/A	#N/A	#N/A	#N/A	#N/A	#N/A	#N/A	#N/A	#N/A	#N/A	#N/A	#N/A	#N/A	#N/A	#N/A	#N/A	#N/A	#N/A	#N/A
	#N/A	#N/A	#N/A	#N/A	#N/A	#N/A	#N/A	#N/A	#N/A	#N/A	#N/A	#N/A	#N/A	#N/A	#N/A	#N/A	#N/A	#N/A	#N/A	#N/A	#N/A	#N/A	#N/A	#N/A	#N/A	#N/A	#N/A	#N/A	#N/A	#N/A	#N/A	#N/A	#N/A	#N/A	#N/A	#N/A	#N/A	#N/A	#N/A	#N/A	#N/A	#N/A	#N/A	#N/A	#N/A	#N/A	#N/A	#N/A	#N/A
	#N/A	#N/A	#N/A	#N/A	#N/A	#N/A	#N/A	#N/A	#N/A	#N/A	#N/A	#N/A	#N/A	#N/A	#N/A	#N/A	#N/A	#N/A	#N/A	#N/A	#N/A	#N/A	#N/A	#N/A	#N/A	#N/A	#N/A	#N/A	#N/A	#N/A	#N/A	#N/A	#N/A	#N/A	#N/A	#N/A	#N/A	#N/A	#N/A	#N/A	#N/A	#N/A	#N/A	#N/A	#N/A	#N/A	#N/A	#N/A	#N/A
	#N/A	#N/A	#N/A	#N/A	#N/A	#N/A	#N/A	#N/A	#N/A	#N/A	#N/A	#N/A	#N/A	#N/A	#N/A	#N/A	#N/A	#N/A	#N/A	#N/A	#N/A	#N/A	#N/A	#N/A	#N/A	#N/A	#N/A	#N/A	#N/A	#N/A	#N/A	#N/A	#N/A	#N/A	#N/A	#N/A	#N/A	#N/A	#N/A	#N/A	#N/A	#N/A	#N/A	#N/A	#N/A	#N/A	#N/A	#N/A	#N/A
	#N/A	#N/A	#N/A	#N/A	#N/A	#N/A	#N/A	#N/A	#N/A	#N/A	#N/A	#N/A	#N/A	#N/A	#N/A	#N/A	#N/A	#N/A	#N/A	#N/A	#N/A	#N/A	#N/A	#N/A	#N/A	#N/A	#N/A	#N/A	#N/A	#N/A	#N/A	#N/A	#N/A	#N/A	#N/A	#N/A	#N/A	#N/A	#N/A	#N/A	#N/A	#N/A	#N/A	#N/A	#N/A	#N/A	#N/A	#N/A	#N/A
	#N/A	#N/A	#N/A	#N/A	#N/A	#N/A	#N/A	#N/A	#N/A	#N/A	#N/A	#N/A	#N/A	#N/A	#N/A	#N/A	#N/A	#N/A	#N/A	#N/A	#N/A	#N/A	#N/A	#N/A	#N/A	#N/A	#N/A	#N/A	#N/A	#N/A	#N/A	#N/A	#N/A	#N/A	#N/A	#N/A	#N/A	#N/A	#N/A	#N/A	#N/A	#N/A	#N/A	#N/A	#N/A	#N/A	#N/A	#N/A	#N/A
	#N/A	#N/A	#N/A	#N/A	#N/A	#N/A	#N/A	#N/A	#N/A	#N/A	#N/A	#N/A	#N/A	#N/A	#N/A	#N/A	#N/A	#N/A	#N/A	#N/A	#N/A	#N/A	#N/A	#N/A	#N/A	#N/A	#N/A	#N/A	#N/A	#N/A	#N/A	#N/A	#N/A	#N/A	#N/A	#N/A	#N/A	#N/A	#N/A	#N/A	#N/A	#N/A	#N/A	#N/A	#N/A	#N/A	#N/A	#N/A	#N/A
	#N/A	#N/A	#N/A	#N/A	#N/A	#N/A	#N/A	#N/A	#N/A	#N/A	#N/A	#N/A	#N/A	#N/A	#N/A	#N/A	#N/A	#N/A	#N/A	#N/A	#N/A	#N/A	#N/A	#N/A	#N/A	#N/A	#N/A	#N/A	#N/A	#N/A	#N/A	#N/A	#N/A	#N/A	#N/A	#N/A	#N/A	#N/A	#N/A	#N/A	#N/A	#N/A	#N/A	#N/A	#N/A	#N/A	#N/A	#N/A	#N/A
	#N/A	#N/A	#N/A	#N/A	#N/A	#N/A	#N/A	#N/A	#N/A	#N/A	#N/A	#N/A	#N/A	#N/A	#N/A	#N/A	#N/A	#N/A	#N/A	#N/A	#N/A	#N/A	#N/A	#N/A	#N/A	#N/A	#N/A	#N/A	#N/A	#N/A	#N/A	#N/A	#N/A	#N/A	#N/A	#N/A	#N/A	#N/A	#N/A	#N/A	#N/A	#N/A	#N/A	#N/A	#N/A	#N/A	#N/A	#N/A	#N/A
	#N/A	#N/A	#N/A	#N/A	#N/A	#N/A	#N/A	#N/A	#N/A	#N/A	#N/A	#N/A	#N/A	#N/A	#N/A	#N/A	#N/A	#N/A	#N/A	#N/A	#N/A	#N/A	#N/A	#N/A	#N/A	#N/A	#N/A	#N/A	#N/A	#N/A	#N/A	#N/A	#N/A	#N/A	#N/A	#N/A	#N/A	#N/A	#N/A	#N/A	#N/A	#N/A	#N/A	#N/A	#N/A	#N/A	#N/A	#N/A	#N/A
	#N/A	#N/A	#N/A	#N/A	#N/A	#N/A	#N/A	#N/A	#N/A	#N/A	#N/A	#N/A	#N/A	#N/A	#N/A	#N/A	#N/A	#N/A	#N/A	#N/A	#N/A	#N/A	#N/A	#N/A	#N/A	#N/A	#N/A	#N/A	#N/A	#N/A	#N/A	#N/A	#N/A	#N/A	#N/A	#N/A	#N/A	#N/A	#N/A	#N/A	#N/A	#N/A	#N/A	#N/A	#N/A	#N/A	#N/A	#N/A	#N/A
	#N/A	#N/A	#N/A	#N/A	#N/A	#N/A	#N/A	#N/A	#N/A	#N/A	#N/A	#N/A	#N/A	#N/A	#N/A	#N/A	#N/A	#N/A	#N/A	#N/A	#N/A	#N/A	#N/A	#N/A	#N/A	#N/A	#N/A	#N/A	#N/A	#N/A	#N/A	#N/A	#N/A	#N/A	#N/A	#N/A	#N/A	#N/A	#N/A	#N/A	#N/A	#N/A	#N/A	#N/A	#N/A	#N/A	#N/A	#N/A	#N/A
	#N/A	#N/A	#N/A	#N/A	#N/A	#N/A	#N/A	#N/A	#N/A	#N/A	#N/A	#N/A	#N/A	#N/A	#N/A	#N/A	#N/A	#N/A	#N/A	#N/A	#N/A	#N/A	#N/A	#N/A	#N/A	#N/A	#N/A	#N/A	#N/A	#N/A	#N/A	#N/A	#N/A	#N/A	#N/A	#N/A	#N/A	#N/A	#N/A	#N/A	#N/A	#N/A	#N/A	#N/A	#N/A	#N/A	#N/A	#N/A	#N/A
	#N/A	#N/A	#N/A	#N/A	#N/A	#N/A	#N/A	#N/A	#N/A	#N/A	#N/A	#N/A	#N/A	#N/A	#N/A	#N/A	#N/A	#N/A	#N/A	#N/A	#N/A	#N/A	#N/A	#N/A	#N/A	#N/A	#N/A	#N/A	#N/A	#N/A	#N/A	#N/A	#N/A	#N/A	#N/A	#N/A	#N/A	#N/A	#N/A	#N/A	#N/A	#N/A	#N/A	#N/A	#N/A	#N/A	#N/A	#N/A	#N/A
	#N/A	#N/A	#N/A	#N/A	#N/A	#N/A	#N/A	#N/A	#N/A	#N/A	#N/A	#N/A	#N/A	#N/A	#N/A	#N/A	#N/A	#N/A	#N/A	#N/A	#N/A	#N/A	#N/A	#N/A	#N/A	#N/A	#N/A	#N/A	#N/A	#N/A	#N/A	#N/A	#N/A	#N/A	#N/A	#N/A	#N/A	#N/A	#N/A	#N/A	#N/A	#N/A	#N/A	#N/A	#N/A	#N/A	#N/A	#N/A	#N/A
	#N/A	#N/A	#N/A	#N/A	#N/A	#N/A	#N/A	#N/A	#N/A	#N/A	#N/A	#N/A	#N/A	#N/A	#N/A	#N/A	#N/A	#N/A	#N/A	#N/A	#N/A	#N/A	#N/A	#N/A	#N/A	#N/A	#N/A	#N/A	#N/A	#N/A	#N/A	#N/A	#N/A	#N/A	#N/A	#N/A	#N/A	#N/A	#N/A	#N/A	#N/A	#N/A	#N/A	#N/A	#N/A	#N/A	#N/A	#N/A	#N/A
	#N/A	#N/A	#N/A	#N/A	#N/A	#N/A	#N/A	#N/A	#N/A	#N/A	#N/A	#N/A	#N/A	#N/A	#N/A	#N/A	#N/A	#N/A	#N/A	#N/A	#N/A	#N/A	#N/A	#N/A	#N/A	#N/A	#N/A	#N/A	#N/A	#N/A	#N/A	#N/A	#N/A	#N/A	#N/A	#N/A	#N/A	#N/A	#N/A	#N/A	#N/A	#N/A	#N/A	#N/A	#N/A	#N/A	#N/A	#N/A	#N/A
	#N/A	#N/A	#N/A	#N/A	#N/A	#N/A	#N/A	#N/A	#N/A	#N/A	#N/A	#N/A	#N/A	#N/A	#N/A	#N/A	#N/A	#N/A	#N/A	#N/A	#N/A	#N/A	#N/A	#N/A	#N/A	#N/A	#N/A	#N/A	#N/A	#N/A	#N/A	#N/A	#N/A	#N/A	#N/A	#N/A	#N/A	#N/A	#N/A	#N/A	#N/A	#N/A	#N/A	#N/A	#N/A	#N/A	#N/A	#N/A	#N/A
	#N/A	#N/A	#N/A	#N/A	#N/A	#N/A	#N/A	#N/A	#N/A	#N/A	#N/A	#N/A	#N/A	#N/A	#N/A	#N/A	#N/A	#N/A	#N/A	#N/A	#N/A	#N/A	#N/A	#N/A	#N/A	#N/A	#N/A	#N/A	#N/A	#N/A	#N/A	#N/A	#N/A	#N/A	#N/A	#N/A	#N/A	#N/A	#N/A	#N/A	#N/A	#N/A	#N/A	#N/A	#N/A	#N/A	#N/A	#N/A	#N/A
	#N/A	#N/A	#N/A	#N/A	#N/A	#N/A	#N/A	#N/A	#N/A	#N/A	#N/A	#N/A	#N/A	#N/A	#N/A	#N/A	#N/A	#N/A	#N/A	#N/A	#N/A	#N/A	#N/A	#N/A	#N/A	#N/A	#N/A	#N/A	#N/A	#N/A	#N/A	#N/A	#N/A	#N/A	#N/A	#N/A	#N/A	#N/A	#N/A	#N/A	#N/A	#N/A	#N/A	#N/A	#N/A	#N/A	#N/A	#N/A	#N/A
	#N/A	#N/A	#N/A	#N/A	#N/A	#N/A	#N/A	#N/A	#N/A	#N/A	#N/A	#N/A	#N/A	#N/A	#N/A	#N/A	#N/A	#N/A	#N/A	#N/A	#N/A	#N/A	#N/A	#N/A	#N/A	#N/A	#N/A	#N/A	#N/A	#N/A	#N/A	#N/A	#N/A	#N/A	#N/A	#N/A	#N/A	#N/A	#N/A	#N/A	#N/A	#N/A	#N/A	#N/A	#N/A	#N/A	#N/A	#N/A	#N/A
	#N/A	#N/A	#N/A	#N/A	#N/A	#N/A	#N/A	#N/A	#N/A	#N/A	#N/A	#N/A	#N/A	#N/A	#N/A	#N/A	#N/A	#N/A	#N/A	#N/A	#N/A	#N/A	#N/A	#N/A	#N/A	#N/A	#N/A	#N/A	#N/A	#N/A	#N/A	#N/A	#N/A	#N/A	#N/A	#N/A	#N/A	#N/A	#N/A	#N/A	#N/A	#N/A	#N/A	#N/A	#N/A	#N/A	#N/A	#N/A	#N/A
	#N/A	#N/A	#N/A	#N/A	#N/A	#N/A	#N/A	#N/A	#N/A	#N/A	#N/A	#N/A	#N/A	#N/A	#N/A	#N/A	#N/A	#N/A	#N/A	#N/A	#N/A	#N/A	#N/A	#N/A	#N/A	#N/A	#N/A	#N/A	#N/A	#N/A	#N/A	#N/A	#N/A	#N/A	#N/A	#N/A	#N/A	#N/A	#N/A	#N/A	#N/A	#N/A	#N/A	#N/A	#N/A	#N/A	#N/A	#N/A	#N/A
	#N/A	#N/A	#N/A	#N/A	#N/A	#N/A	#N/A	#N/A	#N/A	#N/A	#N/A	#N/A	#N/A	#N/A	#N/A	#N/A	#N/A	#N/A	#N/A	#N/A	#N/A	#N/A	#N/A	#N/A	#N/A	#N/A	#N/A	#N/A	#N/A	#N/A	#N/A	#N/A	#N/A	#N/A	#N/A	#N/A	#N/A	#N/A	#N/A	#N/A	#N/A	#N/A	#N/A	#N/A	#N/A	#N/A	#N/A	#N/A	#N/A
	#N/A	#N/A	#N/A	#N/A	#N/A	#N/A	#N/A	#N/A	#N/A	#N/A	#N/A	#N/A	#N/A	#N/A	#N/A	#N/A	#N/A	#N/A	#N/A	#N/A	#N/A	#N/A	#N/A	#N/A	#N/A	#N/A	#N/A	#N/A	#N/A	#N/A	#N/A	#N/A	#N/A	#N/A	#N/A	#N/A	#N/A	#N/A	#N/A	#N/A	#N/A	#N/A	#N/A	#N/A	#N/A	#N/A	#N/A	#N/A	#N/A
	#N/A	#N/A	#N/A	#N/A	#N/A	#N/A	#N/A	#N/A	#N/A	#N/A	#N/A	#N/A	#N/A	#N/A	#N/A	#N/A	#N/A	#N/A	#N/A	#N/A	#N/A	#N/A	#N/A	#N/A	#N/A	#N/A	#N/A	#N/A	#N/A	#N/A	#N/A	#N/A	#N/A	#N/A	#N/A	#N/A	#N/A	#N/A	#N/A	#N/A	#N/A	#N/A	#N/A	#N/A	#N/A	#N/A	#N/A	#N/A	#N/A
	#N/A	#N/A	#N/A	#N/A	#N/A	#N/A	#N/A	#N/A	#N/A	#N/A	#N/A	#N/A	#N/A	#N/A	#N/A	#N/A	#N/A	#N/A	#N/A	#N/A	#N/A	#N/A	#N/A	#N/A	#N/A	#N/A	#N/A	#N/A	#N/A	#N/A	#N/A	#N/A	#N/A	#N/A	#N/A	#N/A	#N/A	#N/A	#N/A	#N/A	#N/A	#N/A	#N/A	#N/A	#N/A	#N/A	#N/A	#N/A	#N/A
	#N/A	#N/A	#N/A	#N/A	#N/A	#N/A	#N/A	#N/A	#N/A	#N/A	#N/A	#N/A	#N/A	#N/A	#N/A	#N/A	#N/A	#N/A	#N/A	#N/A	#N/A	#N/A	#N/A	#N/A	#N/A	#N/A	#N/A	#N/A	#N/A	#N/A	#N/A	#N/A	#N/A	#N/A	#N/A	#N/A	#N/A	#N/A	#N/A	#N/A	#N/A	#N/A	#N/A	#N/A	#N/A	#N/A	#N/A	#N/A	#N/A
	#N/A	#N/A	#N/A	#N/A	#N/A	#N/A	#N/A	#N/A	#N/A	#N/A	#N/A	#N/A	#N/A	#N/A	#N/A	#N/A	#N/A	#N/A	#N/A	#N/A	#N/A	#N/A	#N/A	#N/A	#N/A	#N/A	#N/A	#N/A	#N/A	#N/A	#N/A	#N/A	#N/A	#N/A	#N/A	#N/A	#N/A	#N/A	#N/A	#N/A	#N/A	#N/A	#N/A	#N/A	#N/A	#N/A	#N/A	#N/A	#N/A
	#N/A	#N/A	#N/A	#N/A	#N/A	#N/A	#N/A	#N/A	#N/A	#N/A	#N/A	#N/A	#N/A	#N/A	#N/A	#N/A	#N/A	#N/A	#N/A	#N/A	#N/A	#N/A	#N/A	#N/A	#N/A	#N/A	#N/A	#N/A	#N/A	#N/A	#N/A	#N/A	#N/A	#N/A	#N/A	#N/A	#N/A	#N/A	#N/A	#N/A	#N/A	#N/A	#N/A	#N/A	#N/A	#N/A	#N/A	#N/A	#N/A
	#N/A	#N/A	#N/A	#N/A	#N/A	#N/A	#N/A	#N/A	#N/A	#N/A	#N/A	#N/A	#N/A	#N/A	#N/A	#N/A	#N/A	#N/A	#N/A	#N/A	#N/A	#N/A	#N/A	#N/A	#N/A	#N/A	#N/A	#N/A	#N/A	#N/A	#N/A	#N/A	#N/A	#N/A	#N/A	#N/A	#N/A	#N/A	#N/A	#N/A	#N/A	#N/A	#N/A	#N/A	#N/A	#N/A	#N/A	#N/A	#N/A
	#N/A	#N/A	#N/A	#N/A	#N/A	#N/A	#N/A	#N/A	#N/A	#N/A	#N/A	#N/A	#N/A	#N/A	#N/A	#N/A	#N/A	#N/A	#N/A	#N/A	#N/A	#N/A	#N/A	#N/A	#N/A	#N/A	#N/A	#N/A	#N/A	#N/A	#N/A	#N/A	#N/A	#N/A	#N/A	#N/A	#N/A	#N/A	#N/A	#N/A	#N/A	#N/A	#N/A	#N/A	#N/A	#N/A	#N/A	#N/A	#N/A
	#N/A	#N/A	#N/A	#N/A	#N/A	#N/A	#N/A	#N/A	#N/A	#N/A	#N/A	#N/A	#N/A	#N/A	#N/A	#N/A	#N/A	#N/A	#N/A	#N/A	#N/A	#N/A	#N/A	#N/A	#N/A	#N/A	#N/A	#N/A	#N/A	#N/A	#N/A	#N/A	#N/A	#N/A	#N/A	#N/A	#N/A	#N/A	#N/A	#N/A	#N/A	#N/A	#N/A	#N/A	#N/A	#N/A	#N/A	#N/A	#N/A
	#N/A	#N/A	#N/A	#N/A	#N/A	#N/A	#N/A	#N/A	#N/A	#N/A	#N/A	#N/A	#N/A	#N/A	#N/A	#N/A	#N/A	#N/A	#N/A	#N/A	#N/A	#N/A	#N/A	#N/A	#N/A	#N/A	#N/A	#N/A	#N/A	#N/A	#N/A	#N/A	#N/A	#N/A	#N/A	#N/A	#N/A	#N/A	#N/A	#N/A	#N/A	#N/A	#N/A	#N/A	#N/A	#N/A	#N/A	#N/A	#N/A
	#N/A	#N/A	#N/A	#N/A	#N/A	#N/A	#N/A	#N/A	#N/A	#N/A	#N/A	#N/A	#N/A	#N/A	#N/A	#N/A	#N/A	#N/A	#N/A	#N/A	#N/A	#N/A	#N/A	#N/A	#N/A	#N/A	#N/A	#N/A	#N/A	#N/A	#N/A	#N/A	#N/A	#N/A	#N/A	#N/A	#N/A	#N/A	#N/A	#N/A	#N/A	#N/A	#N/A	#N/A	#N/A	#N/A	#N/A	#N/A	#N/A
	#N/A	#N/A	#N/A	#N/A	#N/A	#N/A	#N/A	#N/A	#N/A	#N/A	#N/A	#N/A	#N/A	#N/A	#N/A	#N/A	#N/A	#N/A	#N/A	#N/A	#N/A	#N/A	#N/A	#N/A	#N/A	#N/A	#N/A	#N/A	#N/A	#N/A	#N/A	#N/A	#N/A	#N/A	#N/A	#N/A	#N/A	#N/A	#N/A	#N/A	#N/A	#N/A	#N/A	#N/A	#N/A	#N/A	#N/A	#N/A	#N/A
	#N/A	#N/A	#N/A	#N/A	#N/A	#N/A	#N/A	#N/A	#N/A	#N/A	#N/A	#N/A	#N/A	#N/A	#N/A	#N/A	#N/A	#N/A	#N/A	#N/A	#N/A	#N/A	#N/A	#N/A	#N/A	#N/A	#N/A	#N/A	#N/A	#N/A	#N/A	#N/A	#N/A	#N/A	#N/A	#N/A	#N/A	#N/A	#N/A	#N/A	#N/A	#N/A	#N/A	#N/A	#N/A	#N/A	#N/A	#N/A	#N/A
	#N/A	#N/A	#N/A	#N/A	#N/A	#N/A	#N/A	#N/A	#N/A	#N/A	#N/A	#N/A	#N/A	#N/A	#N/A	#N/A	#N/A	#N/A	#N/A	#N/A	#N/A	#N/A	#N/A	#N/A	#N/A	#N/A	#N/A	#N/A	#N/A	#N/A	#N/A	#N/A	#N/A	#N/A	#N/A	#N/A	#N/A	#N/A	#N/A	#N/A	#N/A	#N/A	#N/A	#N/A	#N/A	#N/A	#N/A	#N/A	#N/A
	#N/A	#N/A	#N/A	#N/A	#N/A	#N/A	#N/A	#N/A	#N/A	#N/A	#N/A	#N/A	#N/A	#N/A	#N/A	#N/A	#N/A	#N/A	#N/A	#N/A	#N/A	#N/A	#N/A	#N/A	#N/A	#N/A	#N/A	#N/A	#N/A	#N/A	#N/A	#N/A	#N/A	#N/A	#N/A	#N/A	#N/A	#N/A	#N/A	#N/A	#N/A	#N/A	#N/A	#N/A	#N/A	#N/A	#N/A	#N/A	#N/A
	#N/A	#N/A	#N/A	#N/A	#N/A	#N/A	#N/A	#N/A	#N/A	#N/A	#N/A	#N/A	#N/A	#N/A	#N/A	#N/A	#N/A	#N/A	#N/A	#N/A	#N/A	#N/A	#N/A	#N/A	#N/A	#N/A	#N/A	#N/A	#N/A	#N/A	#N/A	#N/A	#N/A	#N/A	#N/A	#N/A	#N/A	#N/A	#N/A	#N/A	#N/A	#N/A	#N/A	#N/A	#N/A	#N/A	#N/A	#N/A	#N/A
		0		1		0	0	1		0	0	1		0	0	1		0	0	1		0	0	1		0	0	1		0	0	1		0	0	1		0	0	1		0	0	1		0	0	1
[truncated: 111 more columns]
